# Supplementary material for: Preparation of Extremely Active Ethylene Tetramerization Catalyst [iPrN(PAr2)2−CrCl2]+[B(C6F5)4]– (Ar = −C6H4-p-SiR3)
Source: MDPI journal article supplement (doi:10.3390/catal11091122), 2021-09-18

# Supporting Information

## Preparation of Extremely Active Ethylene

## Tetramerization Catalyst

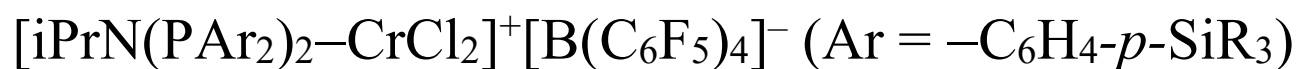

Jung Hyun Lee <sup>1</sup>, Jun Won Baek <sup>1</sup>, Dong Geun Lee <sup>1</sup>, Ji Hyeong Ko <sup>1</sup>, Dong Geun Lee <sup>2</sup>, Kye Sung Cho <sup>2</sup>, Jin Woo Lee <sup>2</sup> and Bun Yeoul Lee <sup>1,\*</sup>

<sup>1</sup>Department of Molecular Science and Technology, Ajou University, 206 Worldcup-ro, Yeongtong-gu, Suwon 16499, Korea

<sup>2</sup>Department of Base Chemical, Hanwha Total, 103 Dokgot 2-ro, Daesan-eup, Seosan-si 31900, Korea

**(2-Ethylhexyl)<sub>3</sub>SiH.** 2-Ethylhexyl bromide (12.3 g, 58.3 mmol, purchased from Aldrich) dissolved in diethyl ether (28 mL) was added dropwise at room temperature for 30 min to a flask containing Mg powder (1.56 g, 64.2 mmol, purchased from Aldrich) in diethyl ether (30 mL). After the resulting solution was refluxed for 3 h, Mg metal added in excess was removed by Celite-aided filtration. The thus-prepared 2-ethylhexyl-MgBr was added dropwise to a solution of HSiCl<sub>3</sub> (1.44 g, 10.6 mmol, purchased from Aldrich) in THF (58 mL). Upon addition, heat was gently generated. The solution was stirred at room temperature for 24 h. After the solvent was removed using a vacuum line. The residue was dissolved in hexane (40 mL) and insoluble fractions were removed by Celite-aided filtration. Silica gel (4 g) was added to the filtrate. After stirring for 2 h, filtration was performed. Removal of solvent afforded a colorless oil. <sup>1</sup>H NMR analysis indicated that the product was contaminated with CH<sub>3</sub>(CH<sub>2</sub>)<sub>3</sub>C(H)(Et)CH<sub>2</sub>–CH<sub>2</sub>C(H)(Et)(CH<sub>2</sub>)<sub>3</sub>CH<sub>3</sub>. Pure (2-ethylhexyl)<sub>3</sub>SiH was isolated via vacuum distillation at 60 °C (2.44 g, 58%). <sup>1</sup>H NMR (600 MHz, C<sub>6</sub>D<sub>6</sub>): δ 4.26 (septet, *J* = 3.6 Hz, 1H, SiH), 1.59 (septet, *J* = 6.6 Hz, 3H, SiCH<sub>2</sub>CH), 1.49-1.38 (12H, CH<sub>2</sub>), 1.38-1.30 (12H, CH<sub>2</sub>), 0.95 (t, *J* = 7.2 Hz, 18H, CH<sub>3</sub>), 0.76 (ddd, *J* = 15, 6.6, 3.6 Hz, 3H, SiCH<sub>2</sub>), 0.73 (ddd, *J* = 15, 6.6, 3.6 Hz, 3H, SiCH<sub>2</sub>) ppm. <sup>13</sup>C{<sup>1</sup>H} NMR (150 MHz, C<sub>6</sub>D<sub>6</sub>): δ 36.5, 36.1, 29.4, 23.5, 18.0, 14.5, 11.2 ppm.

**(3,7-Dimethyloctyl)<sub>3</sub>SiH.** It was prepared by the same procedure and experimental conditions as those employed for (2-ethylhexyl)<sub>3</sub>SiH, using 3,7-dimethyloctyl-MgBr (65 mL, 1.05 M in diethyl ether, 68.2 mmol, purchased from Aldrich). Light yellow oil was obtained (7.27 g, 94 %). <sup>1</sup>H NMR (600 MHz, C<sub>6</sub>D<sub>6</sub>): δ 4.13 (septet, *J* = 3.6 Hz, 1H, SiH), 1.54 (m, 6H), 1.49-1.26 (15H, CH<sub>2</sub>), 1.26-1.11 (9H), 0.97 (d, *J* = 6.6 Hz, 9H), 0.92 (dd, *J* = 7.2, 1.8 Hz, 18H), 0.83-0.74 (m, 3H), 0.74-0.66 (m, 3H) ppm. <sup>13</sup>C{<sup>1</sup>H} NMR (150 MHz, C<sub>6</sub>D<sub>6</sub>): δ 39.8, 37.2, 36.0, 32.2, 28.4, 25.4, 23.0, 22.9, 19.6, 8.6 ppm.

**(2-Ethylhexyl)<sub>3</sub>SiCl.** It was prepared by the same procedure and experimental conditions as those employed for (1-octyl)<sub>3</sub>SiCl, using (2-ethylhexyl)<sub>3</sub>SiH (1.40 g, 3.80 mmol). A yellow oil was obtained (1.40 g, 92 %). <sup>1</sup>H NMR (600 MHz, C<sub>6</sub>D<sub>6</sub>): δ 1.75 (septet, *J* = 6.6 Hz, 3H, SiCH<sub>2</sub>CH), 1.44 (quintet, *J* = 6.6 Hz, 6H, CH<sub>2</sub>), 1.40 (q, *J* = 6.6 Hz, 6H, CH<sub>2</sub>), 1.36-1.26 (12H, CH<sub>2</sub>), 0.96 (dd, *J* = 15, 6.6 Hz,

3H, SiCH<sub>2</sub>), 0.95 (dd,  $J = 15, 6.6$  Hz, 3H, SiCH<sub>2</sub>), 0.94 (t,  $J = 6.6$  Hz, 9H, CH<sub>3</sub>), 0.91 (t,  $J = 7.8$  Hz, 9H, CH<sub>3</sub>) ppm. <sup>13</sup>C{<sup>1</sup>H} NMR (150 MHz, C<sub>6</sub>D<sub>6</sub>):  $\delta$  36.0, 35.3, 29.2, 29.0, 23.5, 23.1, 14.4, 10.9 ppm.

**(3,7-Dimethyloctyl)<sub>3</sub>SiCl**. It was prepared by the same procedure and experimental conditions as those employed for (1-octyl)<sub>3</sub>SiCl, using (3,7-dimethyloctyl)<sub>3</sub>SiH (3.00 g, 6.63 mmol). A yellow oil is obtained. (3.00 g, 93 %). <sup>1</sup>H NMR (600 MHz, C<sub>6</sub>D<sub>6</sub>):  $\delta$  1.59-1.48 (m, 6H), 1.43-1.23 (15H, CH<sub>2</sub>), 1.22-1.08 (9H), 0.917 (d,  $J = 6$  Hz, 30H), 0.87-0.78 (br, 3H) ppm. <sup>13</sup>C{<sup>1</sup>H} NMR (150 MHz, C<sub>6</sub>D<sub>6</sub>):  $\delta$  39.9, 39.8, 37.5, 37.0, 36.3, 35.7, 31.0, 30.4, 28.5, 25.5, 25.3, 23.0, 23.0, 22.9, 22.9, 19.7, 19.5, 13.4, 13.1 ppm.

**BrC<sub>6</sub>H<sub>4</sub>-*p*-Si(1-hexyl)<sub>3</sub>**. It was prepared by the same procedure and experimental conditions as those employed for BrC<sub>6</sub>H<sub>4</sub>-*p*-Si(1-octyl)<sub>3</sub>, using (1-hexyl)<sub>3</sub>SiCl (0.218 g, 0.682 mmol, purchased from TCI). A colorless oil was obtained (0.280 g, 94%). <sup>1</sup>H NMR (600 MHz, C<sub>6</sub>D<sub>6</sub>):  $\delta$  7.41 (d,  $J = 7.8$  Hz, 2H, C<sub>6</sub>H<sub>4</sub>), 7.21 (d,  $J = 8.4$  Hz, 2H, C<sub>6</sub>H<sub>4</sub>), 1.40-1.32 (12H, CH<sub>2</sub>), 1.32-1.23 (12H, CH<sub>2</sub>), 0.91 (t,  $J = 7.2$  Hz, 9H, CH<sub>3</sub>), 0.81-0.76 (br, 6H, SiCH<sub>2</sub>) ppm. <sup>13</sup>C{<sup>1</sup>H} NMR (150 MHz, C<sub>6</sub>D<sub>6</sub>):  $\delta$  137.0, 136.1, 131.3, 124.1, 33.9, 31.9, 24.2, 23.1, 14.6, 12.7 ppm.

**BrC<sub>6</sub>H<sub>4</sub>-*p*-Si(2-ethylhexyl)<sub>3</sub>**. It was prepared by the same procedure and experimental conditions as those employed for BrC<sub>6</sub>H<sub>4</sub>-*p*-Si(1-octyl)<sub>3</sub>, using (2-ethylhexyl)<sub>3</sub>SiCl (0.700 g, 1.74 mmol). The product was purified via column chromatography on silica gel eluting with hexane. A colorless oil was obtained (0.543 g, 60 %). <sup>1</sup>H NMR (600 MHz, C<sub>6</sub>D<sub>6</sub>):  $\delta$  7.40 (d,  $J = 8.4$  Hz, 2H, C<sub>6</sub>H<sub>4</sub>), 7.30 (d,  $J = 8.4$  Hz, 2H, C<sub>6</sub>H<sub>4</sub>), 1.63-1.58 (br, 3H, SiCH<sub>2</sub>CH), 1.34 (m, CH<sub>2</sub>, 6H), 1.31-1.17 (18H, CH<sub>2</sub>), 0.95-0.84 (24H, SiCH<sub>2</sub>, CH<sub>3</sub>) ppm. <sup>13</sup>C{<sup>1</sup>H} NMR (150 MHz, C<sub>6</sub>D<sub>6</sub>):  $\delta$  138.8, 136.2, 131.1, 123.9, 36.0 (m), 36.0, 36.7, 29.2, 23.5, 19.1, 14.4, 10.9 ppm.

**BrC<sub>6</sub>H<sub>4</sub>-*p*-Si(3,7-dimethyloctyl)<sub>3</sub>**. It was prepared by the same procedure and experimental conditions as those employed for BrC<sub>6</sub>H<sub>4</sub>-*p*-Si(1-octyl)<sub>3</sub>, using (3,7-dimethyloctyl)<sub>3</sub>SiCl (1.50 g, 3.08 mmol). A colorless oil was obtained (1.10 g, 61 %). <sup>1</sup>H NMR (600 MHz, C<sub>6</sub>D<sub>6</sub>):  $\delta$  7.43 (d,  $J = 8.4$  Hz, 2H, C<sub>6</sub>H<sub>4</sub>), 7.26 (d,  $J = 8.4$  Hz, 2H, C<sub>6</sub>H<sub>4</sub>), 1.53 (septet,  $J = 6.6$  Hz, 3H), 1.49-1.21 (18H), 1.21-1.10

(m, 9H), 0.96 (d,  $J = 6$  Hz, 9H), 0.92 (d,  $J = 6.6$  Hz, 18H), 0.90 (td,  $J = 13.2, 4.2$  Hz, 3H), 0.82 (td,  $J = 13.2, 4.2$  Hz, 3H) ppm.  $^{13}\text{C}\{^1\text{H}\}$  NMR (150 MHz,  $\text{C}_6\text{D}_6$ ):  $\delta$  136.9, 136.1, 131.5, 124.2, 39.8, 37.0, 36.1, 31.1, 28.4, 25.4, 23.0, 22.9, 19.6, 9.3 ppm.

**$\text{Et}_2\text{NP}[\text{C}_6\text{H}_4\text{-}p\text{-Si(1-hexyl)}_3]_2$ .** It was prepared by the same procedure and experimental conditions as those employed for  $\text{Et}_2\text{NP}[\text{C}_6\text{H}_4\text{-}p\text{-Si(1-octyl)}_3]_2$ , using  $\text{BrC}_6\text{H}_4\text{-}p\text{-Si(1-hexyl)}_3$  (0.197 g, 0.447 mmol). A light yellow oil was obtained (0.146 g, 79 %).  $^1\text{H}$  NMR (600 MHz,  $\text{C}_6\text{D}_6$ ):  $\delta$  7.64 (t,  $^3J_{\text{P-H}} = 7.8$  Hz, 4H,  $\text{C}_6\text{H}_4$ ), 7.57 (d,  $J = 6.6$  Hz, 4H,  $\text{C}_6\text{H}_4$ ), 3.09 (q,  $J = 6.6$  Hz, 2H,  $\text{NCH}_2\text{CH}_3$ ), 3.07 (q,  $J = 6.6$  Hz, 2H,  $\text{NCH}_2\text{CH}_3$ ), 1.45 (m, 12H,  $\text{CH}_2$ ), 1.37 (quintet,  $J = 7.8$  Hz, 12H,  $\text{CH}_2$ ), 1.28 (m, 24H,  $\text{CH}_2$ ), 0.91-0.88 (br, 12H,  $\text{SiCH}_2$ ), 0.90 (t,  $J = 7.2$  Hz, 18H,  $\text{CH}_3$ ), 0.89 (t,  $J = 7.8$  Hz, 6H,  $\text{NCH}_2\text{CH}_3$ ) ppm.  $^{13}\text{C}\{^1\text{H}\}$  NMR (150 MHz,  $\text{C}_6\text{D}_6$ ):  $\delta$  141.9 (d,  $^1J_{\text{P-C}} = 15.8$  Hz), 138.4, 134.3 (d,  $^3J_{\text{P-C}} = 5.7$  Hz), 131.8 (d,  $^2J_{\text{P-C}} = 18.6$  Hz), 44.9 (d,  $^2J_{\text{P-C}} = 15.9$  Hz), 34.0, 31.9, 24.4, 23.1, 14.7 (d,  $^3J_{\text{P-C}} = 2.85$  Hz), 14.4, 13.0 ppm.  $^{31}\text{P}$  (243 MHz,  $\text{C}_6\text{D}_6$ ):  $\delta$  62.0 ppm.

**$\text{Et}_2\text{NP}[\text{C}_6\text{H}_4\text{-}p\text{-Si(2-ethylhexyl)}_3]_2$ .** It was prepared by the same procedure and experimental conditions as those employed for  $\text{Et}_2\text{NP}[\text{C}_6\text{H}_4\text{-}p\text{-Si(1-octyl)}_3]_2$ , using  $\text{BrC}_6\text{H}_4\text{-}p\text{-Si(2-ethylhexyl)}_3$  (0.457 g, 0.872 mmol). Light yellow oil was obtained (0.327 g, 72 %).  $^1\text{H}$  NMR (600 MHz,  $\text{C}_6\text{D}_6$ ):  $\delta$  7.67 (d,  $J = 7.2$  Hz, 4H,  $\text{C}_6\text{H}_4$ ), 7.63 (t,  $^3J_{\text{P-H}} = 7.2$  Hz, 4H,  $\text{C}_6\text{H}_4$ ), 3.13 (q,  $J = 6.6$  Hz, 2H,  $\text{NCH}_2\text{CH}_3$ ), 3.12 (q,  $J = 6.6$  Hz, 2H,  $\text{NCH}_2\text{CH}_3$ ), 1.75-1.62 (br, 6H,  $\text{SiCH}_2\text{CH}$ ), 1.52-1.19 (br, 48H,  $\text{CH}_2$ ), 1.04 (m, 12H,  $\text{SiCH}_2$ ), 0.92 (m, 42H,  $\text{CH}_3$ ,  $\text{NCH}_2\text{CH}_3$ ) ppm.  $^{13}\text{C}\{^1\text{H}\}$  NMR (150 MHz,  $\text{C}_6\text{D}_6$ ):  $\delta$  141.7 (d,  $^1J_{\text{P-C}} = 15.8$  Hz), 140.0, 134.4 (d,  $^3J_{\text{P-C}} = 5.9$  Hz), 131.6 (d,  $^2J_{\text{P-C}} = 18.8$  Hz), 44.9 (d,  $^2J_{\text{P-C}} = 14.4$  Hz), 36.1 (br), 35.8, 29.2, 23.5, 19.2 (t,  $J = 12.9$  Hz), 14.7 (d,  $^3J_{\text{P-C}} = 2.9$  Hz), 14.8, 11.0 ppm.  $^{31}\text{P}$  NMR (243 MHz,  $\text{C}_6\text{D}_6$ ):  $\delta$  61.5 ppm.

**$\text{Et}_2\text{NP}[\text{C}_6\text{H}_4\text{-}p\text{-Si(3,7-dimethyloctyl)}_3]_2$ .** It was prepared by the same procedure and experimental conditions as those employed for  $\text{Et}_2\text{NP}[\text{C}_6\text{H}_4\text{-}p\text{-Si(1-octyl)}_3]_2$ , using  $\text{BrC}_6\text{H}_4\text{-}p\text{-Si(3,7-dimethyloctyl)}_3$  (0.960 g, 1.58 mmol). Light yellow oil was obtained (0.705 g, 77 %).  $^1\text{H}$  NMR (600 MHz,  $\text{C}_6\text{D}_6$ ):  $\delta$  7.63 (t,  $^3J_{\text{P-H}} = 7.2$  Hz, 4H,  $\text{C}_6\text{H}_4$ ), 7.61 (d,  $J = 6$  Hz, 4H,  $\text{C}_6\text{H}_4$ ), 3.09 (q,  $J = 7.2$  Hz,

2H, NCH<sub>2</sub>CH<sub>3</sub>), 3.07 (q,  $J$  = 7.2 Hz, 2H, NCH<sub>2</sub>CH<sub>3</sub>), 1.55 (m, 12H), 1.49-1.24 (30H), 1.23-1.12 (18H), 1.07-0.95 (br, 6H), 0.97 (d,  $J$  = 6.0 Hz, 18H), 0.94-0.90 (6H), 0.92 (d,  $J$  = 6.6 Hz, 36H), 0.88 (t,  $J$  = 6.6 Hz, 6H, NCH<sub>2</sub>CH<sub>3</sub>) ppm. <sup>13</sup>C{<sup>1</sup>H} NMR (150 MHz, C<sub>6</sub>D<sub>6</sub>): δ 141.9 (d, <sup>1</sup> $J_{P-C}$  = 15.9 Hz), 138.2, 134.3 (d, <sup>3</sup> $J_{P-C}$  = 5.7 Hz), 131.9 (d, <sup>2</sup> $J_{P-C}$  = 18.8 Hz), 44.9 (d, <sup>2</sup> $J_{P-C}$  = 15.8 Hz), 39.8, 37.0, 36.2, 31.2, 28.4, 25.4, 23.0, 22.9, 19.6, 14.8 (d, <sup>3</sup> $J_{P-C}$  = 2.9 Hz), 9.5 ppm. <sup>31</sup>P (243 MHz, C<sub>6</sub>D<sub>6</sub>): δ 62.0 ppm.

**CIP[C<sub>6</sub>H<sub>4</sub>-*p*-Si(1-hexyl)<sub>3</sub>]<sub>2</sub>.** It was prepared by the same procedure and experimental conditions as those employed for CIP[C<sub>6</sub>H<sub>4</sub>-*p*-Si(1-octyl)<sub>3</sub>]<sub>2</sub>, using Et<sub>2</sub>NP[C<sub>6</sub>H<sub>4</sub>-*p*-Si(1-hexyl)<sub>3</sub>]<sub>2</sub> (0.146 g, 0.177 mmol). Light yellow oil was obtained quantitatively. <sup>1</sup>H NMR (600 MHz, C<sub>6</sub>D<sub>6</sub>): δ 7.67 (t, <sup>3</sup> $J_{P-H}$  = 7.2 Hz, 4H, C<sub>6</sub>H<sub>4</sub>), 7.47 (d,  $J$  = 7.8 Hz, 4H, C<sub>6</sub>H<sub>4</sub>), 1.43-1.31 (24H, CH<sub>2</sub>), 1.31-1.20 (24H, CH<sub>2</sub>), 0.91 (t,  $J$  = 7.2 Hz, 18H), 0.85-0.79 (br, 12H, SiCH<sub>2</sub>) ppm. <sup>13</sup>C{<sup>1</sup>H} NMR (150 MHz, C<sub>6</sub>D<sub>6</sub>): δ 141.5, 139.9 (d, <sup>1</sup> $J_{P-C}$  = 33.0 Hz), 134.7 (d, <sup>3</sup> $J_{P-C}$  = 7.1 Hz), 131.5 (d, <sup>2</sup> $J_{P-C}$  = 24.5 Hz), 33.9, 31.9, 24.2, 23.1, 14.4, 12.8 ppm. <sup>31</sup>P (243 MHz, C<sub>6</sub>D<sub>6</sub>): δ 82.6 ppm.

**CIP[C<sub>6</sub>H<sub>4</sub>-*p*-Si(2-ethylhexyl)<sub>3</sub>]<sub>2</sub>.** It was prepared by the same procedure and experimental conditions as those employed for CIP[C<sub>6</sub>H<sub>4</sub>-*p*-Si(1-octyl)<sub>3</sub>]<sub>2</sub>, using Et<sub>2</sub>NP[C<sub>6</sub>H<sub>4</sub>-*p*-Si(2-ethylhexyl)<sub>3</sub>]<sub>2</sub> (0.327 g, 0.330 mmol). Light yellow oil was obtained quantitatively. <sup>1</sup>H NMR (600 MHz, C<sub>6</sub>D<sub>6</sub>): δ 7.64 (t, <sup>3</sup> $J_{P-H}$  = 7.8 Hz, 4H, C<sub>6</sub>H<sub>4</sub>), 7.59 (d,  $J$  = 7.2 Hz, 4H, C<sub>6</sub>H<sub>4</sub>), 1.68-1.60 (br, 6H, SiCH<sub>2</sub>CH), 1.36 (sextet,  $J$  = 7.2 Hz, 12H, CH<sub>2</sub>), 1.33-1.20 (36H, CH<sub>2</sub>), 0.99 (m, 12H, SiCH<sub>2</sub>), 0.95-0.85 (36H, CH<sub>3</sub>) ppm. <sup>13</sup>C{<sup>1</sup>H} NMR (150 MHz, C<sub>6</sub>D<sub>6</sub>): δ 143.2, 139.9 (d, <sup>1</sup> $J_{P-C}$  = 31.5 Hz), 134.7 (d, <sup>3</sup> $J_{P-C}$  = 5.7 Hz), 131.2 (d, <sup>2</sup> $J_{P-C}$  = 23.0 Hz), 36.1 (m), 35.7, 29.2, 23.5, 19.1 (m), 14.5, 11.0 ppm. <sup>31</sup>P(243 MHz, C<sub>6</sub>D<sub>6</sub>): δ 82.3 ppm.

**CIP[C<sub>6</sub>H<sub>4</sub>-*p*-Si(3,7-dimethyloctyl)<sub>3</sub>]<sub>2</sub>.** It was prepared by the same procedure and experimental conditions as those employed for CIP[C<sub>6</sub>H<sub>4</sub>-*p*-Si(1-octyl)<sub>3</sub>]<sub>2</sub>, using Et<sub>2</sub>NP[C<sub>6</sub>H<sub>4</sub>-*p*-Si(3,7-dimethyloctyl)<sub>3</sub>]<sub>2</sub> (0.705 g, 0.608 mmol). Light yellow oil was obtained quantitatively. <sup>1</sup>H NMR (600 MHz, C<sub>6</sub>D<sub>6</sub>): δ 7.68 (t, <sup>3</sup> $J_{P-H}$  = 7.8 Hz, 4H, C<sub>6</sub>H<sub>4</sub>), 7.52 (d,  $J$  = 6.6 Hz, 4H, C<sub>6</sub>H<sub>4</sub>), 1.54 (septet,  $J$  = 6.6 Hz, 6H), 1.50-1.22 (36H), 1.22- 1.10 (18H), 0.95 (d,  $J$  = 6 Hz, 18H), 0.93 (td,  $J$  = 13.2, 3 Hz, 6H),

0.92 (d,  $J = 6.6$  Hz, 36H), 0.85 (td,  $J = 13.2, 3.0$  Hz, 6H) ppm.  $^{13}\text{C}\{^1\text{H}\}$  NMR (150 MHz,  $\text{C}_6\text{D}_6$ ):  $\delta$  141.3, 139.9 (d,  $^1J_{\text{P-C}} = 33.2$  Hz), 134.7 (d,  $^3J_{\text{P-C}} = 5.7$  Hz), 131.5 (d,  $^2J_{\text{P-C}} = 23.0$  Hz), 39.8, 37.0, 36.1, 31.1, 28.4, 25.4, 23.0, 22.9, 19.6, 9.3 (m) ppm.  $^{31}\text{P}$  (243 MHz,  $\text{C}_6\text{D}_6$ ):  $\delta$  82.5 ppm.

**iPrN(PAr<sub>2</sub>)<sub>2</sub> (Ar =  $-\text{C}_6\text{H}_4$ -*p*-Si(1-hexyl)<sub>3</sub>).** It was prepared by the same procedure and experimental conditions as those employed for iPrN(PAr<sub>2</sub>)<sub>2</sub> (Ar =  $-\text{C}_6\text{H}_4$ -*p*-Si(1-octyl)<sub>3</sub>), using ClP[C<sub>6</sub>H<sub>4</sub>-*p*-Si(1-hexyl)<sub>3</sub>]<sub>2</sub> (0.139 g, 0.177 mmol). A light yellow viscous oil was obtained (0.132 g, 76 %).  $^1\text{H}$  NMR (600 MHz,  $\text{C}_6\text{D}_6$ ):  $\delta$  8.08-7.29 (br, 8H,  $\text{C}_6\text{H}_4$ ), 7.52 (d,  $J = 7.2$  Hz, 8H,  $\text{C}_6\text{H}_4$ ), 3.87 (m, 1H,  $\text{NCHCH}_3$ ), 1.45 (m, 24H,  $\text{CH}_2$ ), 1.38 (m, 24H,  $\text{CH}_2$ ), 1.30 (m, 48H,  $\text{CH}_2$ ), 1.24 (d,  $J = 6$  Hz, 6H,  $\text{NCHCH}_3$ ), 0.93 (t,  $J = 6.6$  Hz, 36H,  $\text{CH}_3$ ), 0.91-0.86 (br, 24H,  $\text{SiCH}_2$ ) ppm.  $^{13}\text{C}\{^1\text{H}\}$  NMR (150 MHz,  $\text{C}_6\text{D}_6$ ):  $\delta$  141.89-140.81 (br), 138.9, 134.2 (d,  $^3J_{\text{P-C}} = 4.2$  Hz), 133.2-132.3 (br), 52.5 (t,  $^2J_{\text{P-C}} = 10.2$  Hz), 34.0, 32.0, 24.5 (t,  $^3J_{\text{P-C}} = 7.1$  Hz), 24.3, 23.1, 14.4, 12.9 ppm.  $^{31}\text{P}$  (243 MHz,  $\text{C}_6\text{D}_6$ ):  $\delta$  55.1, 41.9 ppm.

**iPrN(PAr<sub>2</sub>)<sub>2</sub> (Ar =  $-\text{C}_6\text{H}_4$ -*p*-Si(2-ethylhexyl)<sub>3</sub>).** It was prepared by the same procedure and experimental conditions as those employed for iPrN(PAr<sub>2</sub>)<sub>2</sub> (Ar =  $-\text{C}_6\text{H}_4$ -*p*-Si(1-octyl)<sub>3</sub>), using ClP[C<sub>6</sub>H<sub>4</sub>-*p*-Si(2-ethylhexyl)<sub>3</sub>]<sub>2</sub> (0.266 g, 0.279 mmol). A colorless viscous oil was obtained (0.220 g, 92 %).  $^1\text{H}$  NMR (600 MHz,  $\text{C}_6\text{D}_6$ ):  $\delta$  8.01-7.34 (br, 8H,  $\text{C}_6\text{H}_4$ ), 7.68 (d,  $J = 4.8$  Hz, 8H,  $\text{C}_6\text{H}_4$ ), 3.97 (m, 1H,  $\text{NCHCH}_3$ ), 1.77-1.66 (br, 12H,  $\text{SiCH}_2\text{CH}$ ), 1.46-1.26 (96H,  $\text{CH}_2$ ), 1.27 (d,  $J = 7.8$  Hz, 6H,  $\text{NCHCH}_3$ ), 1.13-1.03 (br, 24H,  $\text{SiCH}_2$ ), 1.01-0.91 (72H,  $\text{CH}_3$ ) ppm.  $^{13}\text{C}\{^1\text{H}\}$  NMR (150 MHz,  $\text{C}_6\text{D}_6$ ):  $\delta$  141.9-140.8 (br), 140.7, 134.3 (d,  $^3J_{\text{P-C}} = 4.4$  Hz), 133.2-132.1 (br), 52.6 (t,  $^2J_{\text{P-C}} = 10.1$  Hz), 36.2 (d,  $J = 5.7$  Hz), 35.8, 29.3 (m), 24.8-24.5 (br), 23.6, 19.2, 14.5, 11.0 ppm.  $^{31}\text{P}$  (243 MHz,  $\text{C}_6\text{D}_6$ ):  $\delta$  55.0, 43.1 ppm.

**iPrN(PAr<sub>2</sub>)<sub>2</sub> (Ar =  $-\text{C}_6\text{H}_4$ -*p*-Si(3,7-dimethyloctyl)<sub>3</sub>).** It was prepared by the same procedure and experimental conditions as those employed for iPrN(PAr<sub>2</sub>)<sub>2</sub> (Ar =  $-\text{C}_6\text{H}_4$ -*p*-Si(1-octyl)<sub>3</sub>), using ClP[C<sub>6</sub>H<sub>4</sub>-*p*-Si(3,7-dimethyloctyl)<sub>3</sub>]<sub>2</sub> (0.400 g, 0.356 mmol). A light yellow viscous oil was obtained (0.355 g, 98 %).  $^1\text{H}$  NMR (600 MHz,  $\text{C}_6\text{D}_6$ ):  $\delta$  8.11- 7.30 (br, 8H,  $\text{C}_6\text{H}_4$ ), 7.58 (d,  $J = 7.2$  Hz, 8H,  $\text{C}_6\text{H}_4$ ), 3.87 (m, 1H,  $\text{NCHCH}_3$ ), 1.60-1.51 (m, 24H), 1.51-1.27 (54H), 1.27-1.11 (48H), 1.10-0.89 (br,

24H), 1.01 (d,  $J = 7.2$  Hz, 36H), 0.94 (d,  $J = 6.6$  Hz, 72H) ppm.  $^{13}\text{C}\{^1\text{H}\}$  NMR (150 MHz,  $\text{C}_6\text{D}_6$ ):  $\delta$  141.7-141.0 (br), 138.7, 134.2 ( $^3J_{\text{P-C}} = 4.2$  Hz), 133.4-132.4 (br), 52.5 (t,  $^2J_{\text{P-C}} = 10.5$  Hz), 39.8, 37.1, 36.2 (d,  $J = 3.0$  Hz), 31.3, 28.4, 25.5, 24.6 (t,  $^3J_{\text{P-C}} = 7.2$  Hz), 23.0, 22.9, 19.7, 9.46 (d,  $J = 4.2$  Hz) ppm.  $^{31}\text{P}$  (243 MHz,  $\text{C}_6\text{D}_6$ ):  $\delta$  56.5, 42.0 ppm.

**$\text{C}_6\text{H}_{11}\text{N}(\text{PAR}_2)_2$  ( $\text{Ar} = -\text{C}_6\text{H}_4\text{-}p\text{-Si(1-octyl)}_3$ ).** It was prepared by the same procedure and experimental conditions as those employed for  $\text{iPrN}(\text{PAR}_2)_2$  ( $\text{Ar} = -\text{C}_6\text{H}_4\text{-}p\text{-Si(1-octyl)}_3$ ), using cyclohexylamine (0.0141 g, 0.143 mmol, purchased from Aldrich) instead of  $\text{iPrNH}_2$  and  $\text{ClP}[\text{C}_6\text{H}_4\text{-}p\text{-Si(1-octyl)}_3]_2$  (0.300 g, 0.314 mmol). A light yellow viscous oil was obtained (0.258 g, 93 %).  $^1\text{H}$  NMR (600 MHz,  $\text{C}_6\text{D}_6$ ):  $\delta$  8.03-7.29 (br, 8H,  $\text{C}_6\text{H}_4$ ), 7.56 (s, 8H,  $\text{C}_6\text{H}_4$ ), 3.48 (m, 1H, NCH), 2.22-2.10 (br, 2H, NCH<sub>2</sub>), 1.61 (br, 3H, NCH<sub>2</sub>), 1.55-1.46 (br, 24H, CH<sub>2</sub>), 1.46-1.39 (quintet,  $J = 6.6$  Hz, 24H, CH<sub>2</sub>), 1.39-1.24 (96H, CH<sub>2</sub>), 1.12-1.03 (br, 3H, NCH<sub>2</sub>), 0.94 (t,  $J = 6.6$  Hz, 36H, CH<sub>3</sub>), 0.97-0.88 (br, 24H, SiCH<sub>2</sub>), 0.82 (m, 2H, NCH<sub>2</sub>) ppm.  $^{13}\text{C}\{^1\text{H}\}$  NMR (150 MHz,  $\text{C}_6\text{D}_6$ ):  $\delta$  142.3-140.7 (br), 138.9, 134.2, 133.4-132.1 (br), 61.2 (m), 35.5 (t,  $^3J_{\text{P-C}} = 7.2$  Hz), 34.4, 32.4, 29.8, 29.8, 26.6, 26.1, 24.4, 23.2, 14.4, 13.0 ppm.  $^{31}\text{P}$  (243 MHz,  $\text{C}_6\text{D}_6$ ):  $\delta$  54.7, 46.3 ppm.

**2-Et-6-Me- $\text{C}_6\text{H}_3\text{N}(\text{PAR}_2)_2$  ( $\text{Ar} = -\text{C}_6\text{H}_4\text{-}p\text{-Si(nBu)}_3$ ).** It was prepared by the same procedure and experimental conditions as those employed for  $\text{iPrN}(\text{P}[\text{C}_6\text{H}_4\text{-}p\text{-Si(1-octyl)}_3]_2)_2$ , using 2-methyl-6-ethylaniline (0.0520 g, 0.385 mmol, purchased from TCI) instead of  $\text{iPrNH}_2$  and  $\text{ClP}[\text{C}_6\text{H}_4\text{-}p\text{-Si(n-Bu)}_3]_2$  (0.524 g, 0.848 mmol). Light yellow oil was obtained (0.470 g, 94 %).  $^1\text{H}$  NMR (600 MHz,  $\text{C}_6\text{D}_6$ ):  $\delta$  7.82 (t,  $^3J_{\text{P-H}} = 7.2$  Hz, 4H,  $\text{C}_6\text{H}_4$ ), 7.79 (t,  $^3J_{\text{P-H}} = 7.8$  Hz, 4H,  $\text{C}_6\text{H}_4$ ), 7.49 (d,  $J = 7.2$  Hz, 4H,  $\text{C}_6\text{H}_4$ ), 7.46 (d,  $J = 6.6$  Hz, 4H,  $\text{C}_6\text{H}_4$ ), 7.10-7.07 (br, 2H), 6.97 (t,  $J = 5.4$  Hz, 1H), 2.20 (q,  $J = 7.8$  Hz, 2H,  $\text{CH}_2\text{CH}_3$ ), 1.89 (s, 3H, CH<sub>3</sub>), 1.41-1.31 (48H, CH<sub>2</sub>), 0.91 (t,  $J = 6.6$  Hz, 36H, CH<sub>3</sub>), 0.86 (t,  $J = 7.2$  Hz, 3H,  $\text{CH}_2\text{CH}_3$ ), 0.84-0.78 (br, 24H, SiH<sub>2</sub>) ppm.  $^{13}\text{C}\{^1\text{H}\}$  NMR (150 MHz,  $\text{C}_6\text{D}_6$ ):  $\delta$  145.9 (t,  $^3J_{\text{P-C}} = 5.85$  Hz), 144.8, 140.6 (d,  $^2J_{\text{P-C}} = 21.6$  Hz), 140.0, 139.7, 139.1, 136.1, 134.6, 134.3 (dd,  $J = 24.5, 4.4$  Hz), 134.1 (t,  $^3J_{\text{P-C}} = 7.2$  Hz), 131.3, 129.2, 127.1, 126.9, 27.2, 26.5, 25.6, 21.3, 15.3, 14.0, 12.5 ppm.  $^{31}\text{P}$  (243 MHz,  $\text{C}_6\text{D}_6$ ): 57.0 ppm.

**iPrN(PPh<sub>2</sub>)(PAr<sub>2</sub>)** (**Ar** = **–C<sub>6</sub>H<sub>4</sub>–*p*–Si(1-decyl)<sub>3</sub>**). A solution of iPrNH<sub>2</sub> (0.0620 g, 1.05 mmol) in CH<sub>2</sub>Cl<sub>2</sub> (0.25 mL) was added dropwise to a solution of ClP[C<sub>6</sub>H<sub>4</sub>–*p*–Si(1-decyl)<sub>3</sub>]<sub>2</sub> (0.118 g, 0.105 mmol) in CH<sub>2</sub>Cl<sub>2</sub> (0.50 mL) and the resulting solution was stirred overnight at room temperature. After the solvent was removed using a vacuum line, the residue was dissolved in hexane (2 mL). Insoluble fractions were removed by Celite-aided filtration. Volatiles in the filtrate were removed using a vacuum line to afford iPrN(H)P[C<sub>6</sub>H<sub>4</sub>–*p*–Si(1-decyl)<sub>3</sub>]<sub>2</sub> as a colorless oil (0.0972 g, 81%). <sup>1</sup>H NMR (600 MHz, C<sub>6</sub>D<sub>6</sub>): δ 7.60 (t, *J* = 7.2 Hz, 4H, C<sub>6</sub>H<sub>4</sub>), 7.57 (d, *J* = 6 Hz, 4H, C<sub>6</sub>H<sub>4</sub>), 3.26 (m, 1H, NCHCH<sub>3</sub>), 1.63 (t, *J* = 6.6 Hz, 1H, NH), 1.47 (quintet, *J* = 7.8 Hz, 24H, CH<sub>2</sub>), 1.39 (quintet, *J* = 7.2 Hz, 24H, CH<sub>2</sub>), 1.34-1.21 (br, 48H, CH<sub>2</sub>), 1.00 (d, *J* = 6 Hz, 6H, NCHCH<sub>3</sub>), 0.92 (t, *J* = 7.2 Hz, 18H, CH<sub>3</sub>), 0.95-0.89 (br, 12H, CH<sub>2</sub>) ppm. <sup>13</sup>C{<sup>1</sup>H} NMR (150 MHz, C<sub>6</sub>D<sub>6</sub>): 144.3 (d, <sup>1</sup>*J*<sub>P-C</sub> = 12.9 Hz), 138.3, 134.4 (d, <sup>3</sup>*J*<sub>P-C</sub> = 5.7 Hz), 131.0 (d, <sup>2</sup>*J*<sub>P-C</sub> = 20.1 Hz), 48.9 (d, <sup>2</sup>*J*<sub>P-C</sub> = 22.9 Hz), 34.3, 32.4, 29.8, 26.2 (d, <sup>3</sup>*J*<sub>P-C</sub> = 7.2 Hz), 24.4, 23.1, 14.4, 13.0 ppm. <sup>31</sup>P (243 MHz, C<sub>6</sub>D<sub>6</sub>): 35.3 ppm. The resulting compound iPrN(H)P[C<sub>6</sub>H<sub>4</sub>–*p*–Si(1-decyl)<sub>3</sub>]<sub>2</sub> (0.0891 g, 0.0778 mmol) was dissolved in CH<sub>2</sub>Cl<sub>2</sub> (0.30 mL) and then Et<sub>3</sub>N (0.0787 g, 0.778 mmol) and a solution of Ph<sub>2</sub>PCl (0.0189 g, 0.0856 mmol) in CH<sub>2</sub>Cl<sub>2</sub> (0.50 mL) were successively added. After stirring overnight at room temperature, all volatiles were removed using a vacuum line. Hexane (1.2 mL) was added to the residue and insoluble fractions were removed by Celite-aided filtration. Silica gel (~0.155 g) which had been treated beforehand with hexane/Et<sub>3</sub>N (v/v, 50:1) was added to the filtrate. After stirring for 30 min, filtration was performed. Removal of solvent afforded a light yellow oil (0.0750 g, 73 %), which was used for the next step without further purification. NMR (600 MHz, C<sub>6</sub>D<sub>6</sub>): δ 7.98-7.28 (br, 4H), 7.53 (d, *J* = 6.6 Hz, 4H), 7.19-7.08 (br, 10H), 3.75 (m, 1H, NCHCH<sub>3</sub>), 1.40 (m, 24H, CH<sub>2</sub>), 1.33 (quintet, *J* = 6.6 Hz, 24H, CH<sub>2</sub>), 1.28-1.18 (48H, CH<sub>2</sub>), 1.17 (d, *J* = 6.6 Hz, 6H, NCHCH<sub>3</sub>), 0.96 (t, *J* = 6.6 Hz, 18H, CH<sub>3</sub>), 0.95-0.91 (br, 12H, SiCH<sub>2</sub>) ppm. <sup>13</sup>C{<sup>1</sup>H} NMR (150 MHz, C<sub>6</sub>D<sub>6</sub>): δ 141.4 (d, <sup>1</sup>*J*<sub>P-C</sub> = 18.6 Hz), 140.8 (d, <sup>1</sup>*J*<sub>P-C</sub> = 13.1 Hz), 138.9, 134.3 (d, <sup>3</sup>*J*<sub>P-C</sub> = 5.9 Hz), 133.4 (d, <sup>2</sup>*J*<sub>P-C</sub> = 20.1 Hz), 132.8 (d, <sup>2</sup>*J*<sub>P-C</sub> = 20.1 Hz), 128.8,

128.4 (d,  $^3J_{\text{P-C}} = 7.2$  Hz), 52.5 (t,  $^2J_{\text{P-C}} = 14.4$  Hz), 34.3, 32.4, 29.8, 29.7, 24.6 (t,  $^3J_{\text{P-C}} = 5.7$  Hz), 24.4, 23.2, 14.4, 12.9 ppm.  $^{31}\text{P}$  (243 MHz,  $\text{C}_6\text{D}_6$ ): 55.0, 43.3 ppm.

***Ortho*-C<sub>6</sub>H<sub>4</sub>(PPh<sub>2</sub>)(PAr<sub>2</sub>) (Ar = -C<sub>6</sub>H<sub>4</sub>-*p*-Si(nBu)<sub>3</sub>).** BrC<sub>6</sub>H<sub>4</sub>P(C<sub>6</sub>H<sub>5</sub>)<sub>2</sub> (0.339 g, 0.992 mmol, purchased from TCI) was dissolved in THF (5.6 mL) and cooled to -78 °C. nBuLi (0.40 mL, 2.48 M in hexane, 0.992 mmol) was added dropwise and the resulting solution was stirred for 1 h at -78 °C. (nBu)<sub>3</sub>SiCl (0.612 g, 0.992 mmol) dissolved in THF (3.0 mL) was added dropwise and the solution was allowed to warm to room temperature. After stirring for 2 h, the solvent was removed using a vacuum line. The residue was dissolved in hexane (15 mL) and insoluble fractions were removed by Celite-aided filtration. The product was purified by column chromatography on silica gel eluting with hexane/toluene (v/v, 10:1) (colorless oil, 0.524 g, 63 %).  $^1\text{H}$  NMR (600 MHz,  $\text{C}_6\text{D}_6$ ): 7.43 (t,  $J = 6.6$  Hz, 4H), 7.37 (dd,  $J = 7.2, 1.2$  Hz, 4H), 7.35 (m, 5H), 7.25 (dtd,  $J = 7.8, 3.6, 1.2$  Hz, 1H), 7.04 (m, 6H), 6.93 (dtd,  $J = 17.4, 7.2, 1.2$  Hz, 2H), 1.35 (24H, CH<sub>2</sub>), 0.89 (t,  $J = 7.8$  Hz, 18H, CH<sub>3</sub>), 0.83-0.75 (br, 12H, SiCH<sub>2</sub>) ppm.  $^{13}\text{C}\{^1\text{H}\}$  NMR (150 MHz,  $\text{C}_6\text{D}_6$ ):  $\delta$  145.0 (d,  $J_{\text{P-C}} = 5.9$  Hz), 144.9 (d,  $J_{\text{P-C}} = 5.7$  Hz), 144.5 (d,  $J_{\text{P-C}} = 5.7$  Hz), 144.4 (d,  $J_{\text{P-C}} = 5.9$  Hz), 138.8 (d,  $J_{\text{P-C}} = 11.1$  Hz), 138.5, 138.3 (d,  $J_{\text{P-C}} = 11.1$  Hz), 135.0 (d,  $J_{\text{P-C}} = 5.7$  Hz), 134.5 (m), 133.7 (d,  $J_{\text{P-C}} = 2.9$  Hz), 133.6 (d,  $J_{\text{P-C}} = 4.4$  Hz), 129.5 (d,  $J_{\text{P-C}} = 14.3$  Hz), 128.7 (d,  $J_{\text{P-C}} = 5.7$  Hz), 128.6, 27.2, 26.5, 14.0, 12.6 ppm.  $^{31}\text{P}$  (243 MHz,  $\text{C}_6\text{D}_6$ ): -12.0 (d,  $J = 157$  Hz), -12.9 (d,  $J = 157$  Hz) ppm.

**Figure S1.**  $^{31}\text{P}$  NMR spectra of bis(phosphine) ligands in  $\text{C}_6\text{D}_6$ .

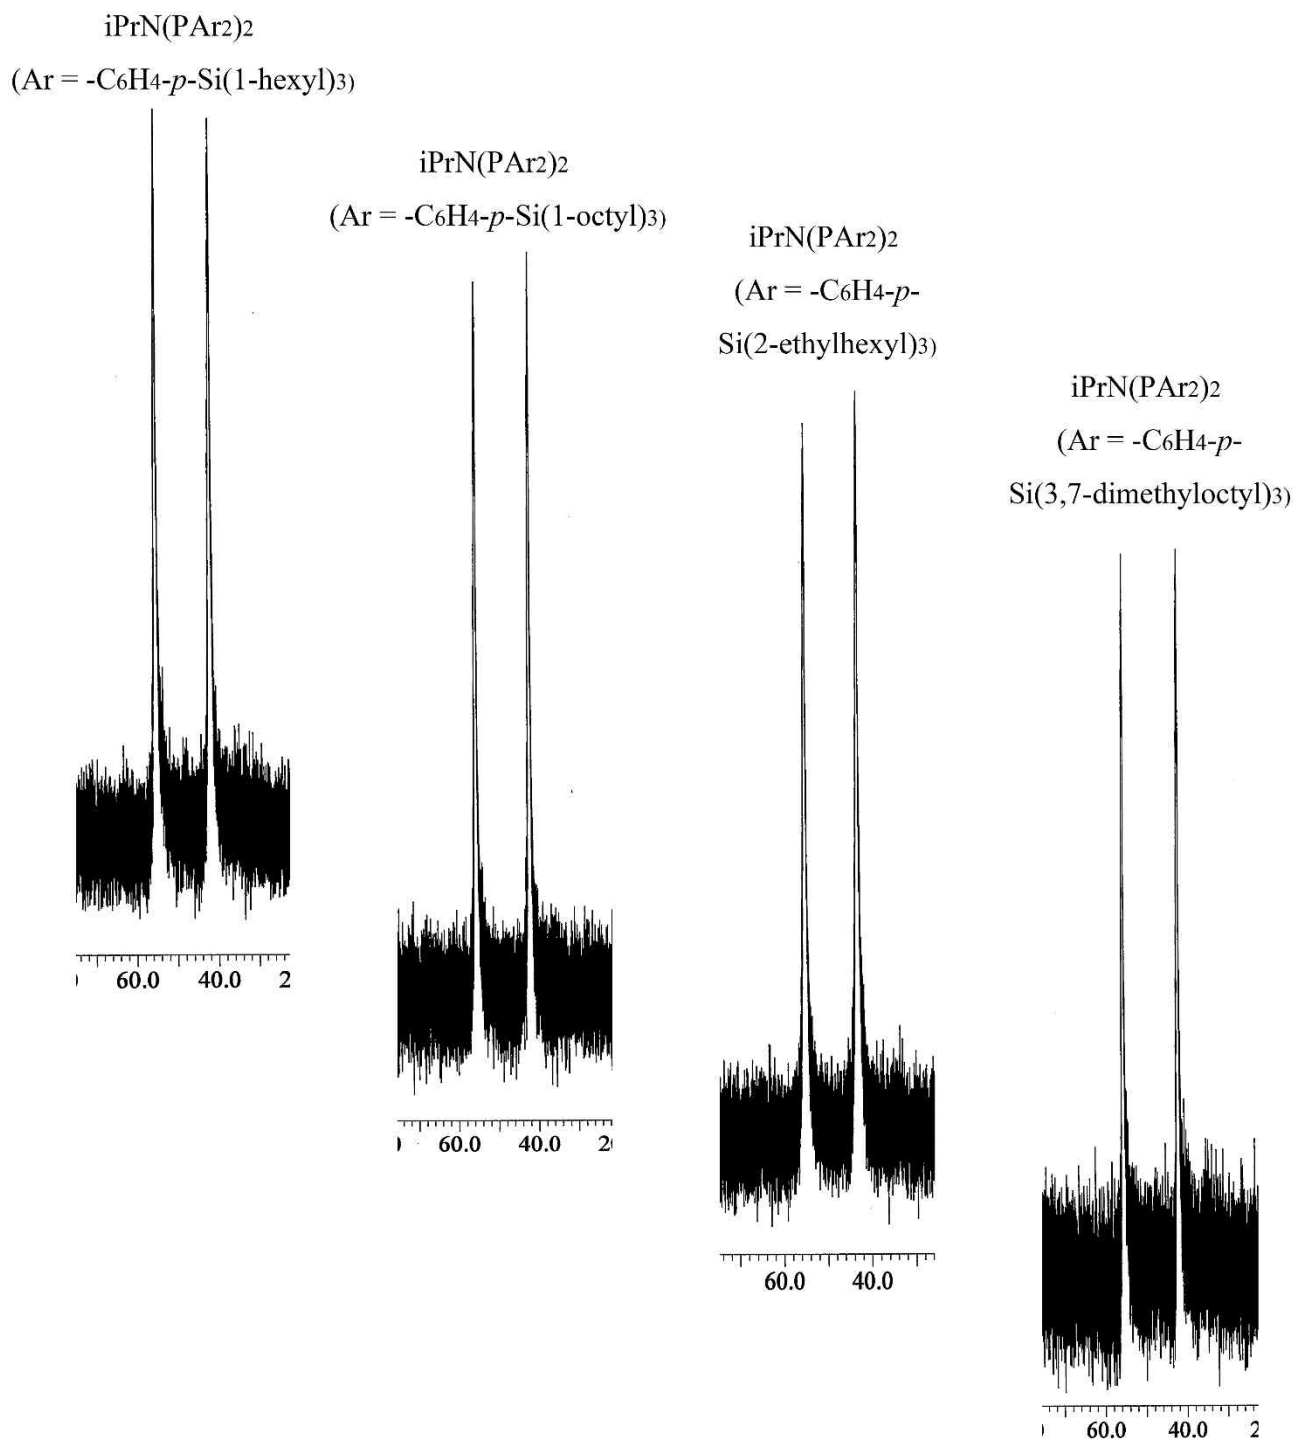

$C_6H_{11}(PAr_2)_2$   
 (Ar =  $-C_6H_4-p-Si(1-octyl)_3$ )

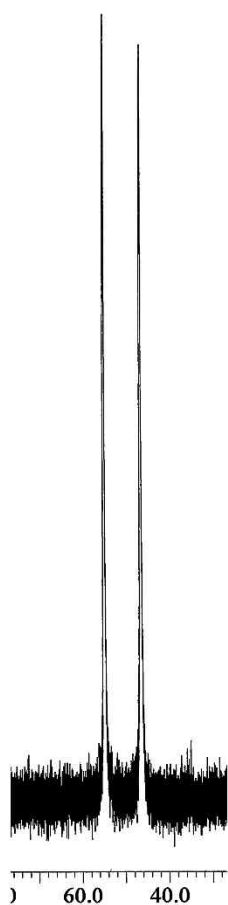

$iPrN(PPh_2)(PAr_2)$   
 (Ar =  $-C_6H_4-p-Si(1-decyl)_3$ ).

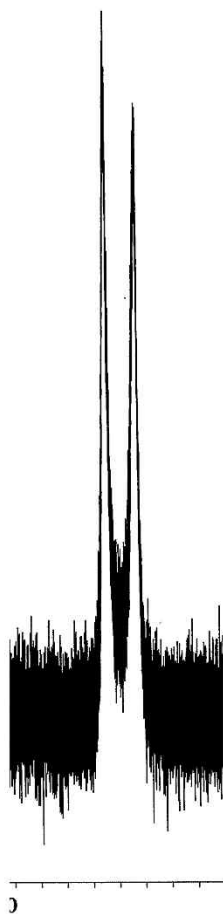

2-Et-6-Me- $C_6H_3N(PAr_2)_2$   
 (Ar =  $-C_6H_4-p-Si(nBu)_3$ )

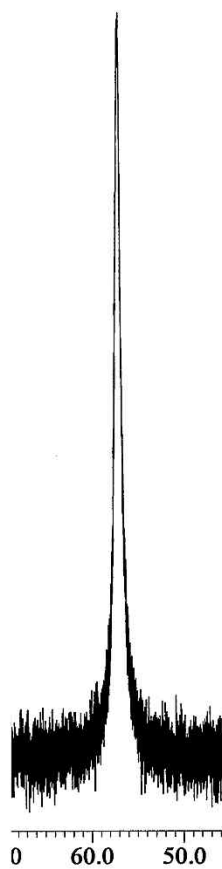

*Ortho*- $C_6H_4(PPh_2)(PAr_2)$   
 (Ar =  $-C_6H_4-p-Si(nBu)_3$ )

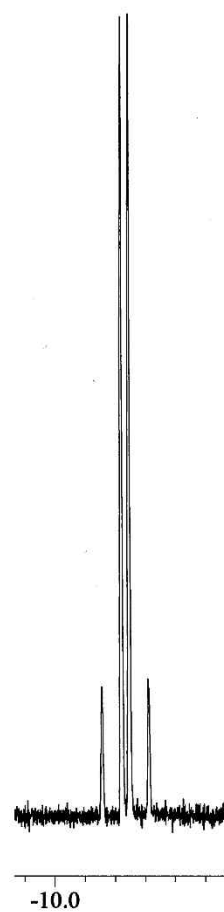

**Figure S2.**  $^{31}\text{P}$  NMR spectra of  $\text{Et}_2\text{NP}(\text{C}_6\text{H}_4\text{-}p\text{-SiR}_3)_2$  in  $\text{C}_6\text{D}_6$ .

$\text{Et}_2\text{NP}[\text{C}_6\text{H}_4\text{-}p\text{-Si(1-hexyl)}_3]_2$

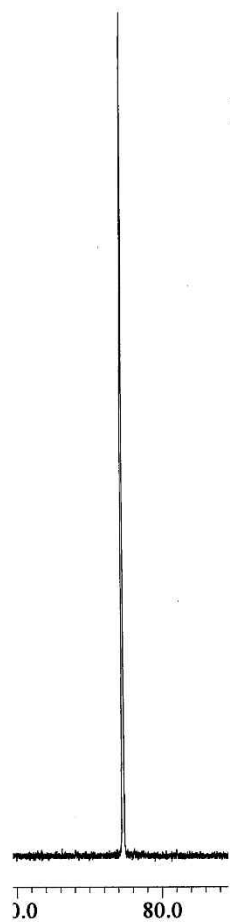

$\text{Et}_2\text{NP}[\text{C}_6\text{H}_4\text{-}p\text{-Si(1-octyl)}_3]_2$

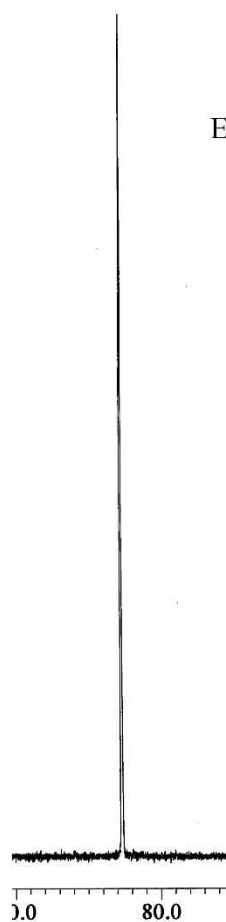

$\text{Et}_2\text{NP}[\text{C}_6\text{H}_4\text{-}p\text{-Si(2-ethylhexyl)}_3]_2$

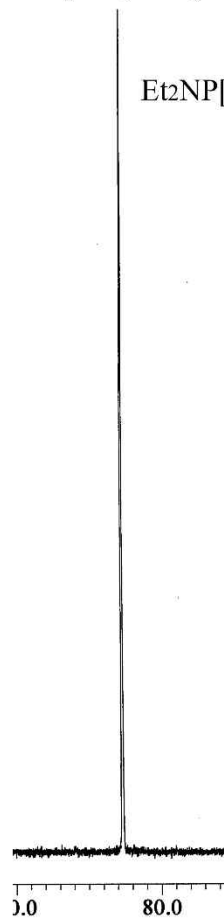

$\text{Et}_2\text{NP}[\text{C}_6\text{H}_4\text{-}p\text{-Si(3,7-dimethyloctyl)}_3]_2$

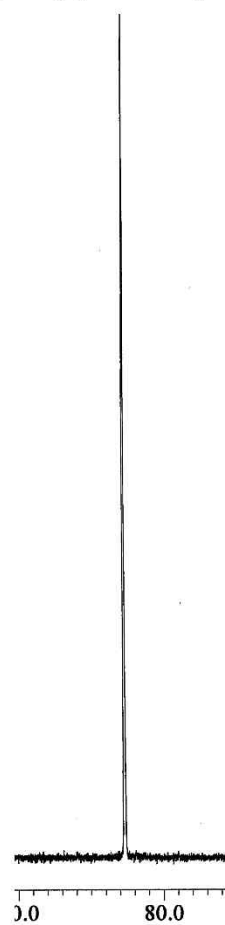

**Figure S3.**  $^{31}\text{P}$  NMR spectra of  $\text{CIP}(\text{C}_6\text{H}_4\text{-}p\text{-SiR}_3)_2$  in  $\text{C}_6\text{D}_6$ .

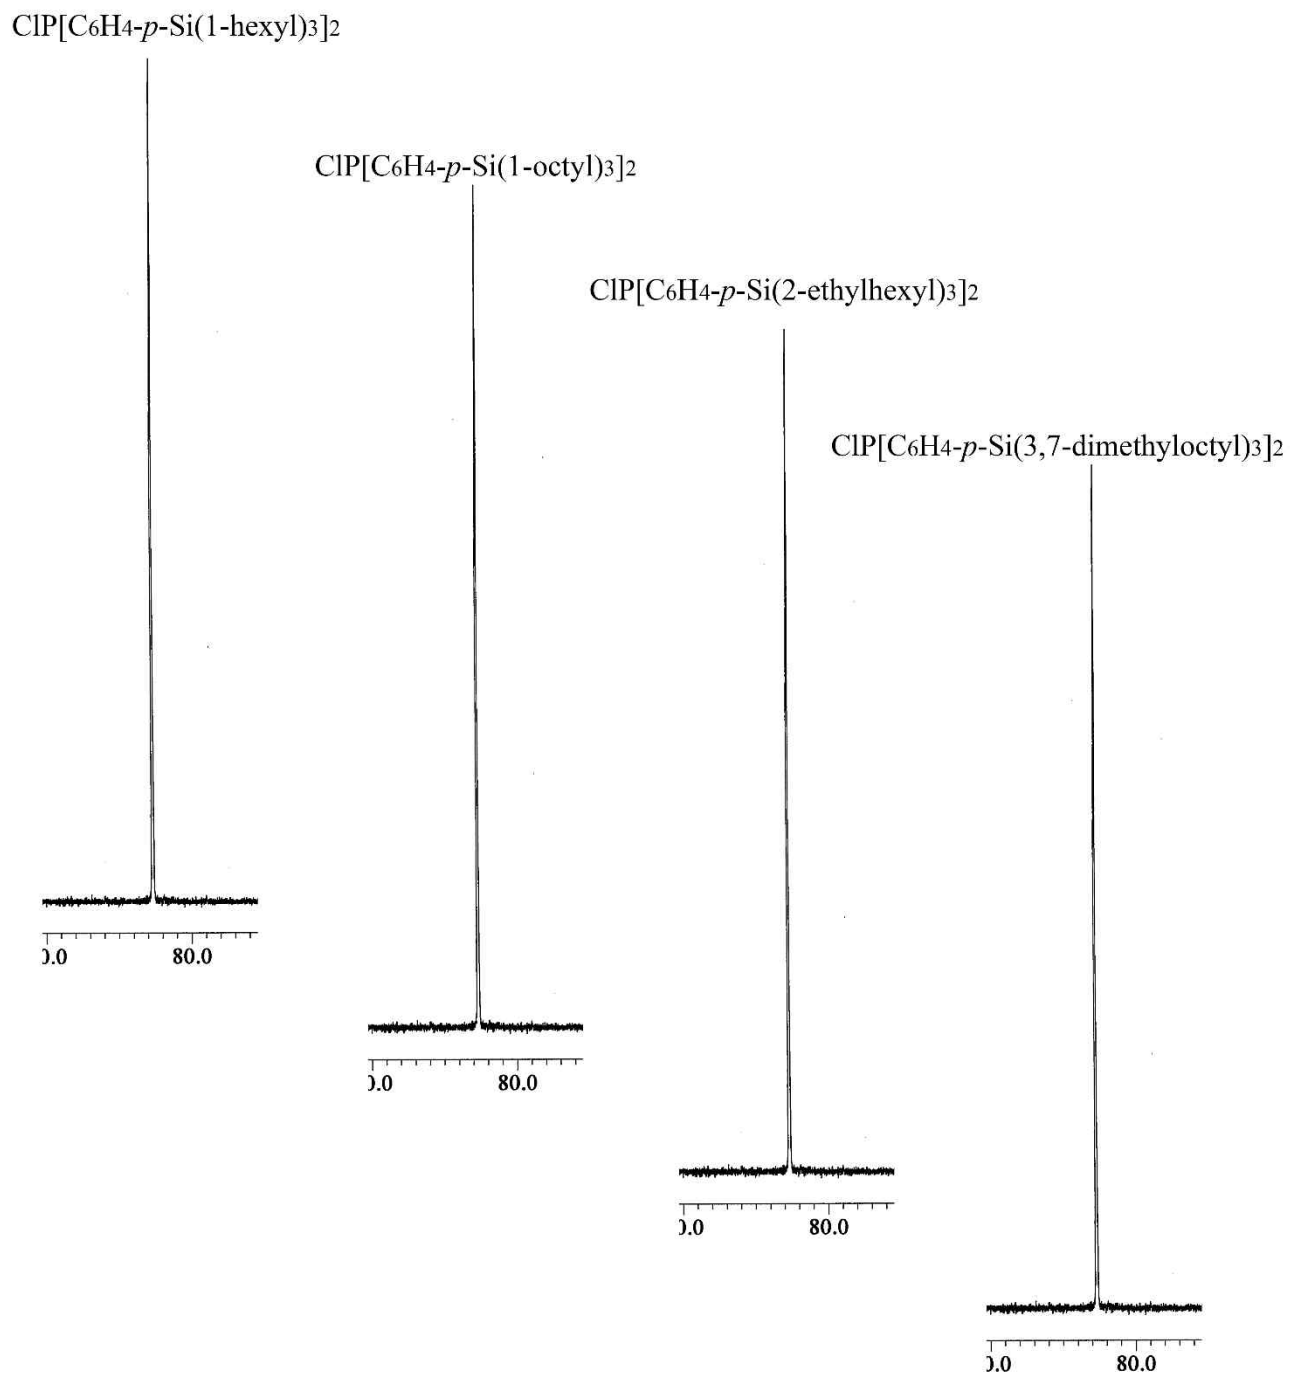

**Figure S4.**  $^1\text{H}$  and  $^{13}\text{C}$  NMR spectra of  $\text{HSi}(\text{2-ethylhexyl})_3$  in  $\text{C}_6\text{D}_6$ .

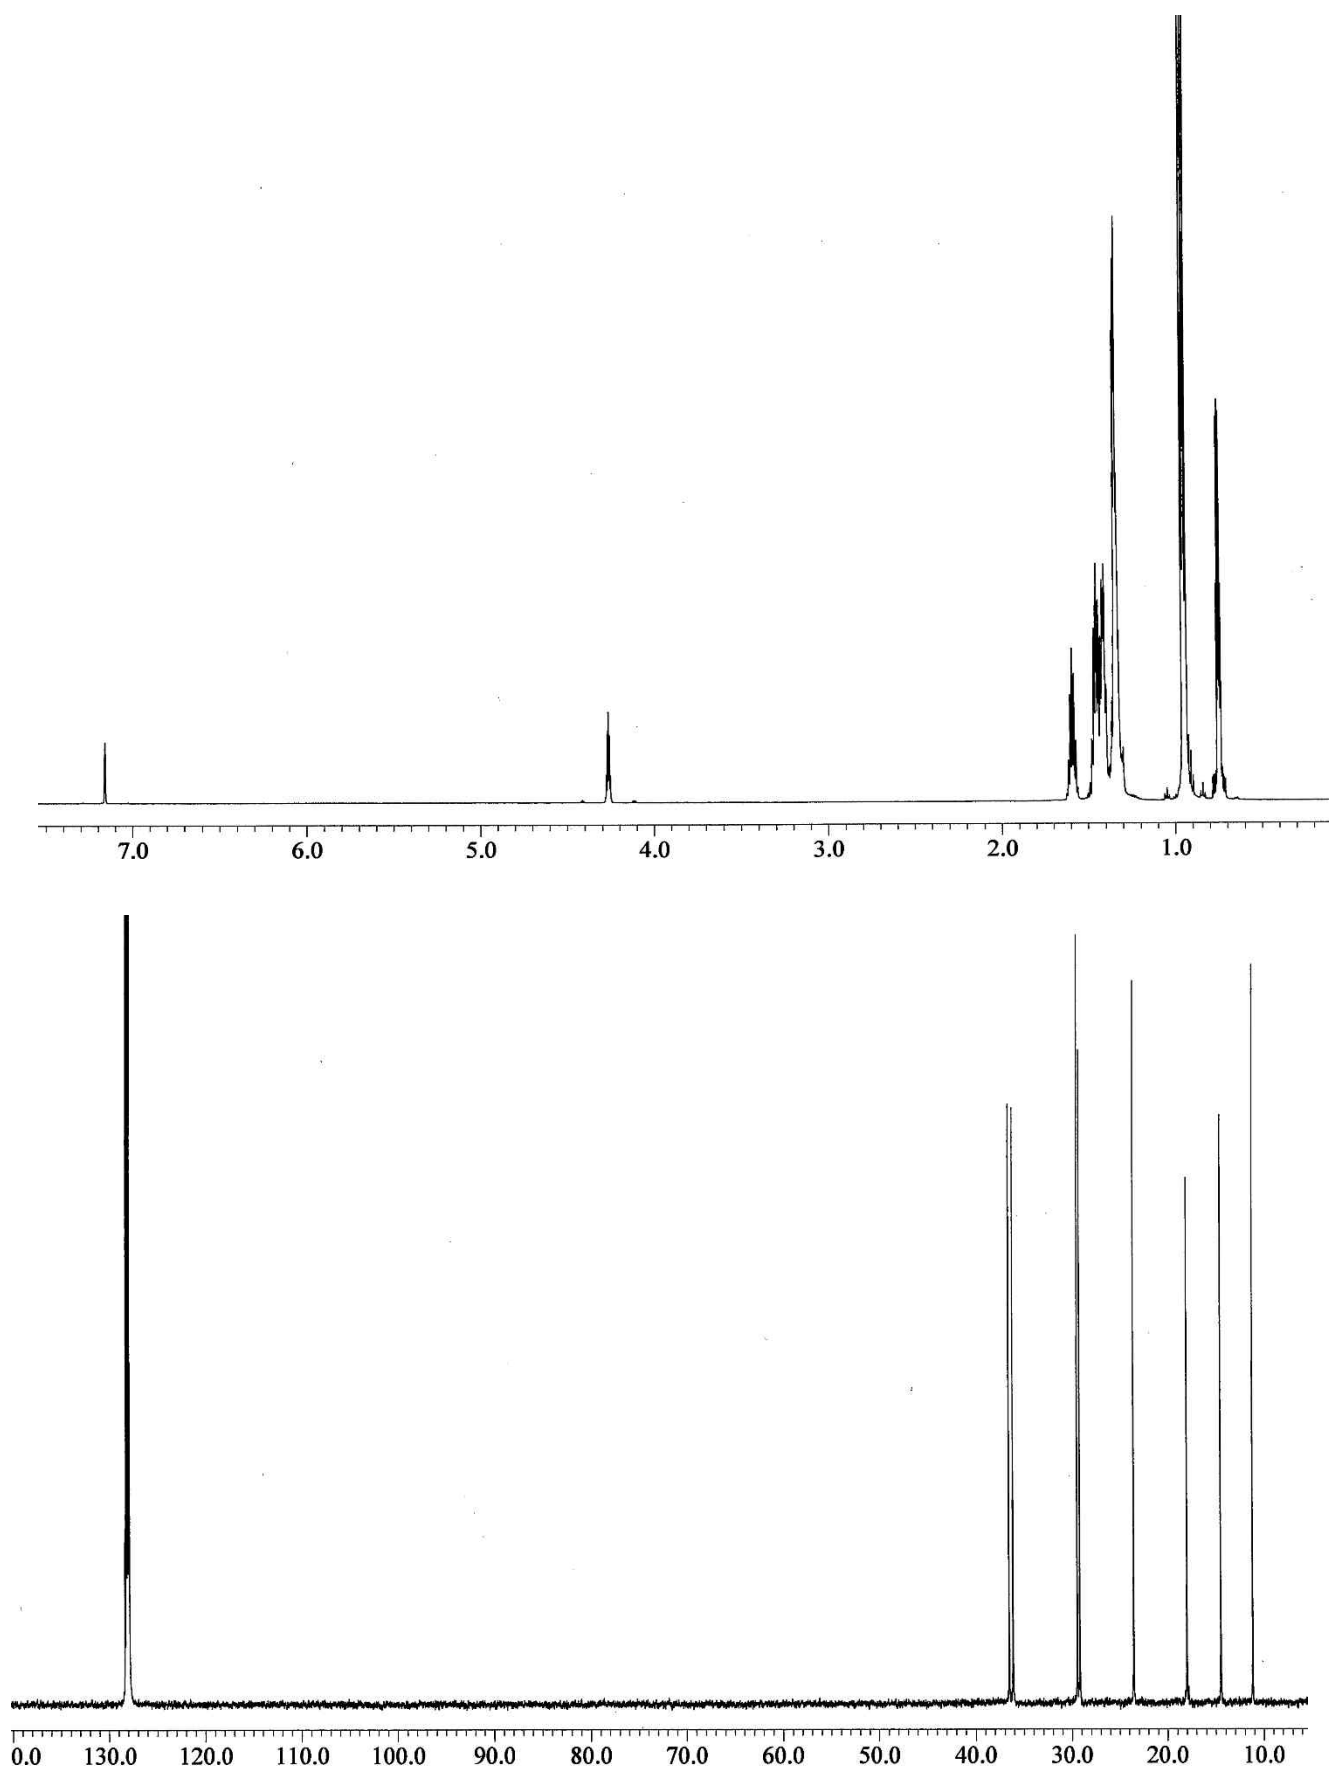

**Figure S5.**  $^1\text{H}$  and  $^{13}\text{C}$  NMR spectra of  $\text{HSi(3,7-dimethyloctyl)}_3$  in  $\text{C}_6\text{D}_6$ .



**Figure S6.**  $^1\text{H}$  and  $^{13}\text{C}$  NMR spectra of  $\text{ClSi}(\text{1-octyl})_3$  in  $\text{C}_6\text{D}_6$ .

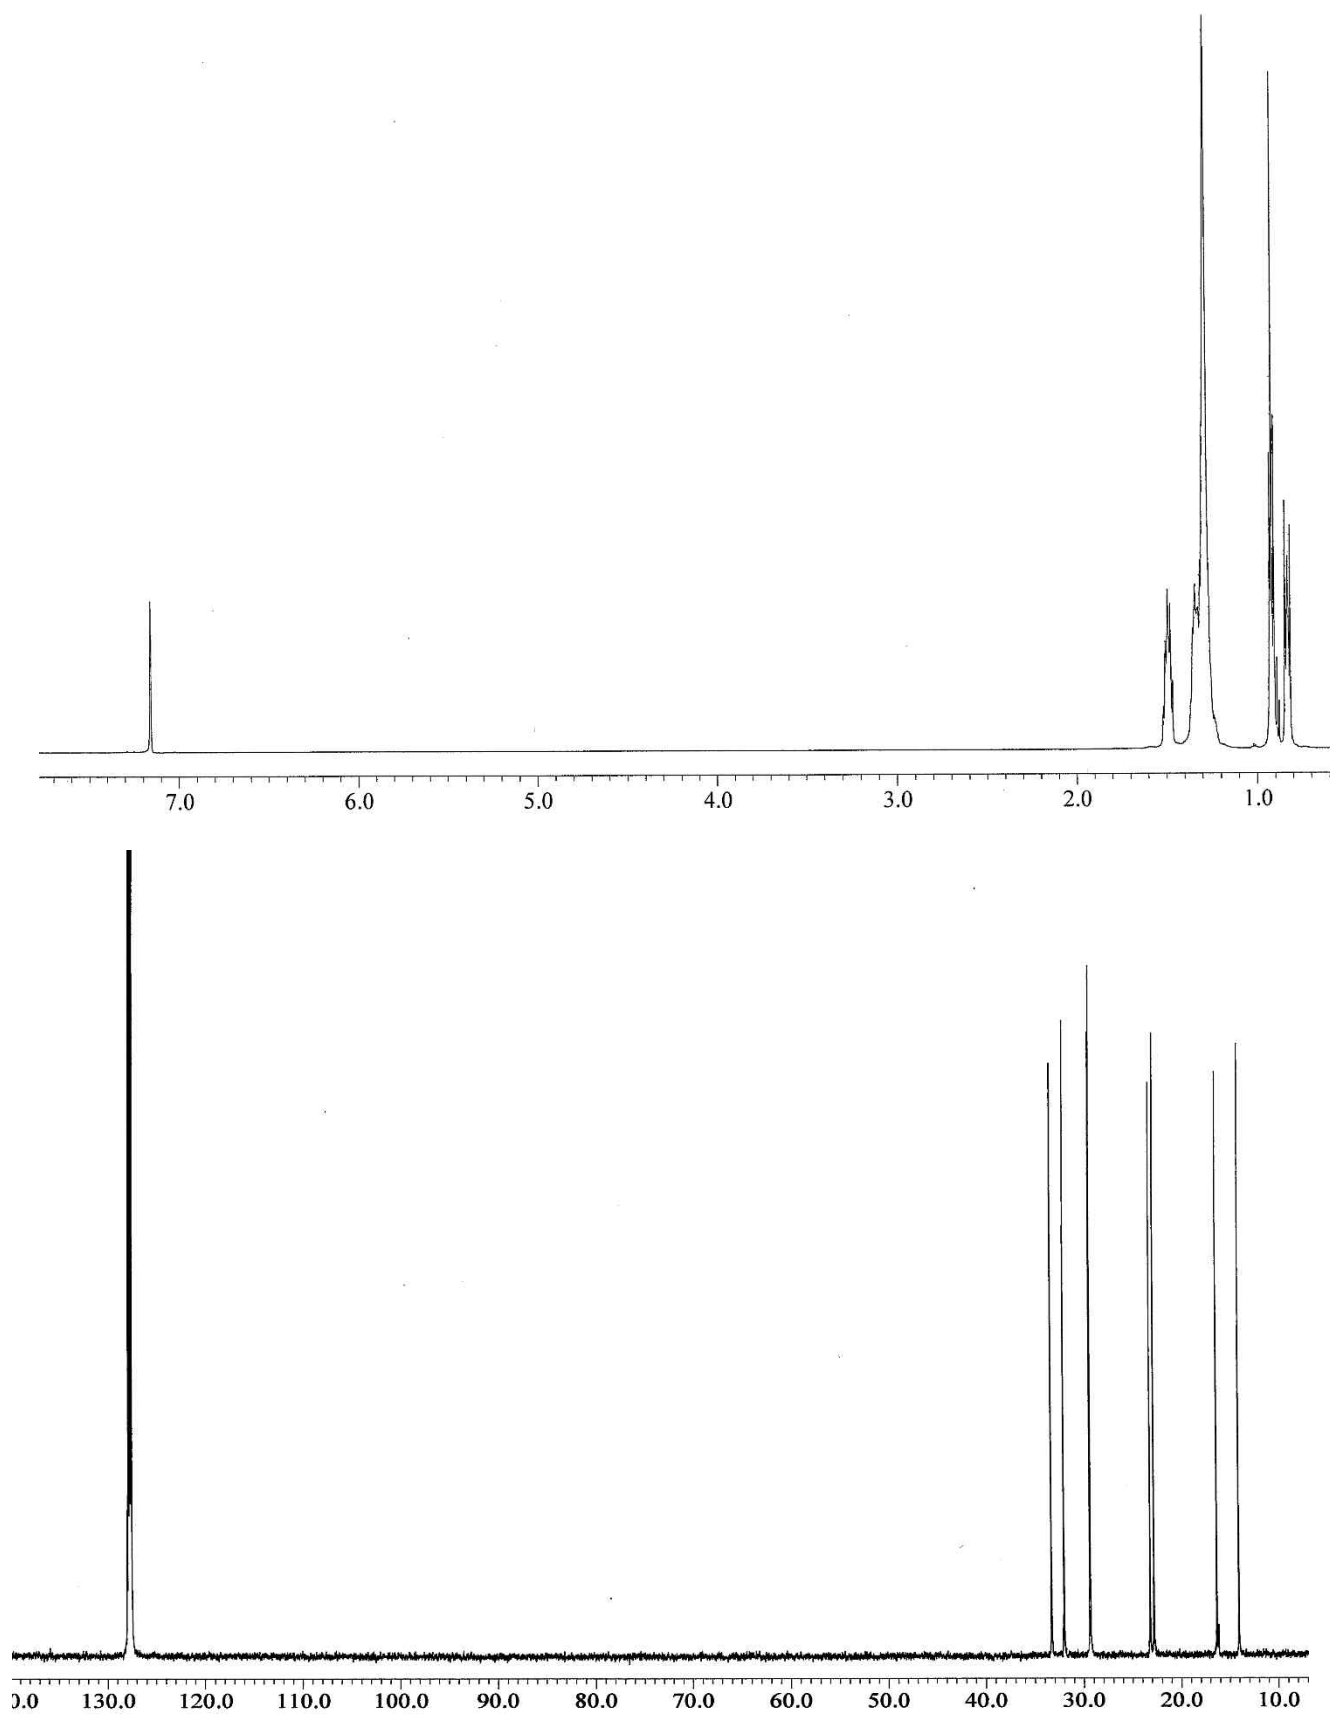

**Figure S7.**  $^1\text{H}$  and  $^{13}\text{C}$  NMR spectra of  $\text{ClSi}(\text{2-ethylhexyl})_3$  in  $\text{C}_6\text{D}_6$ .

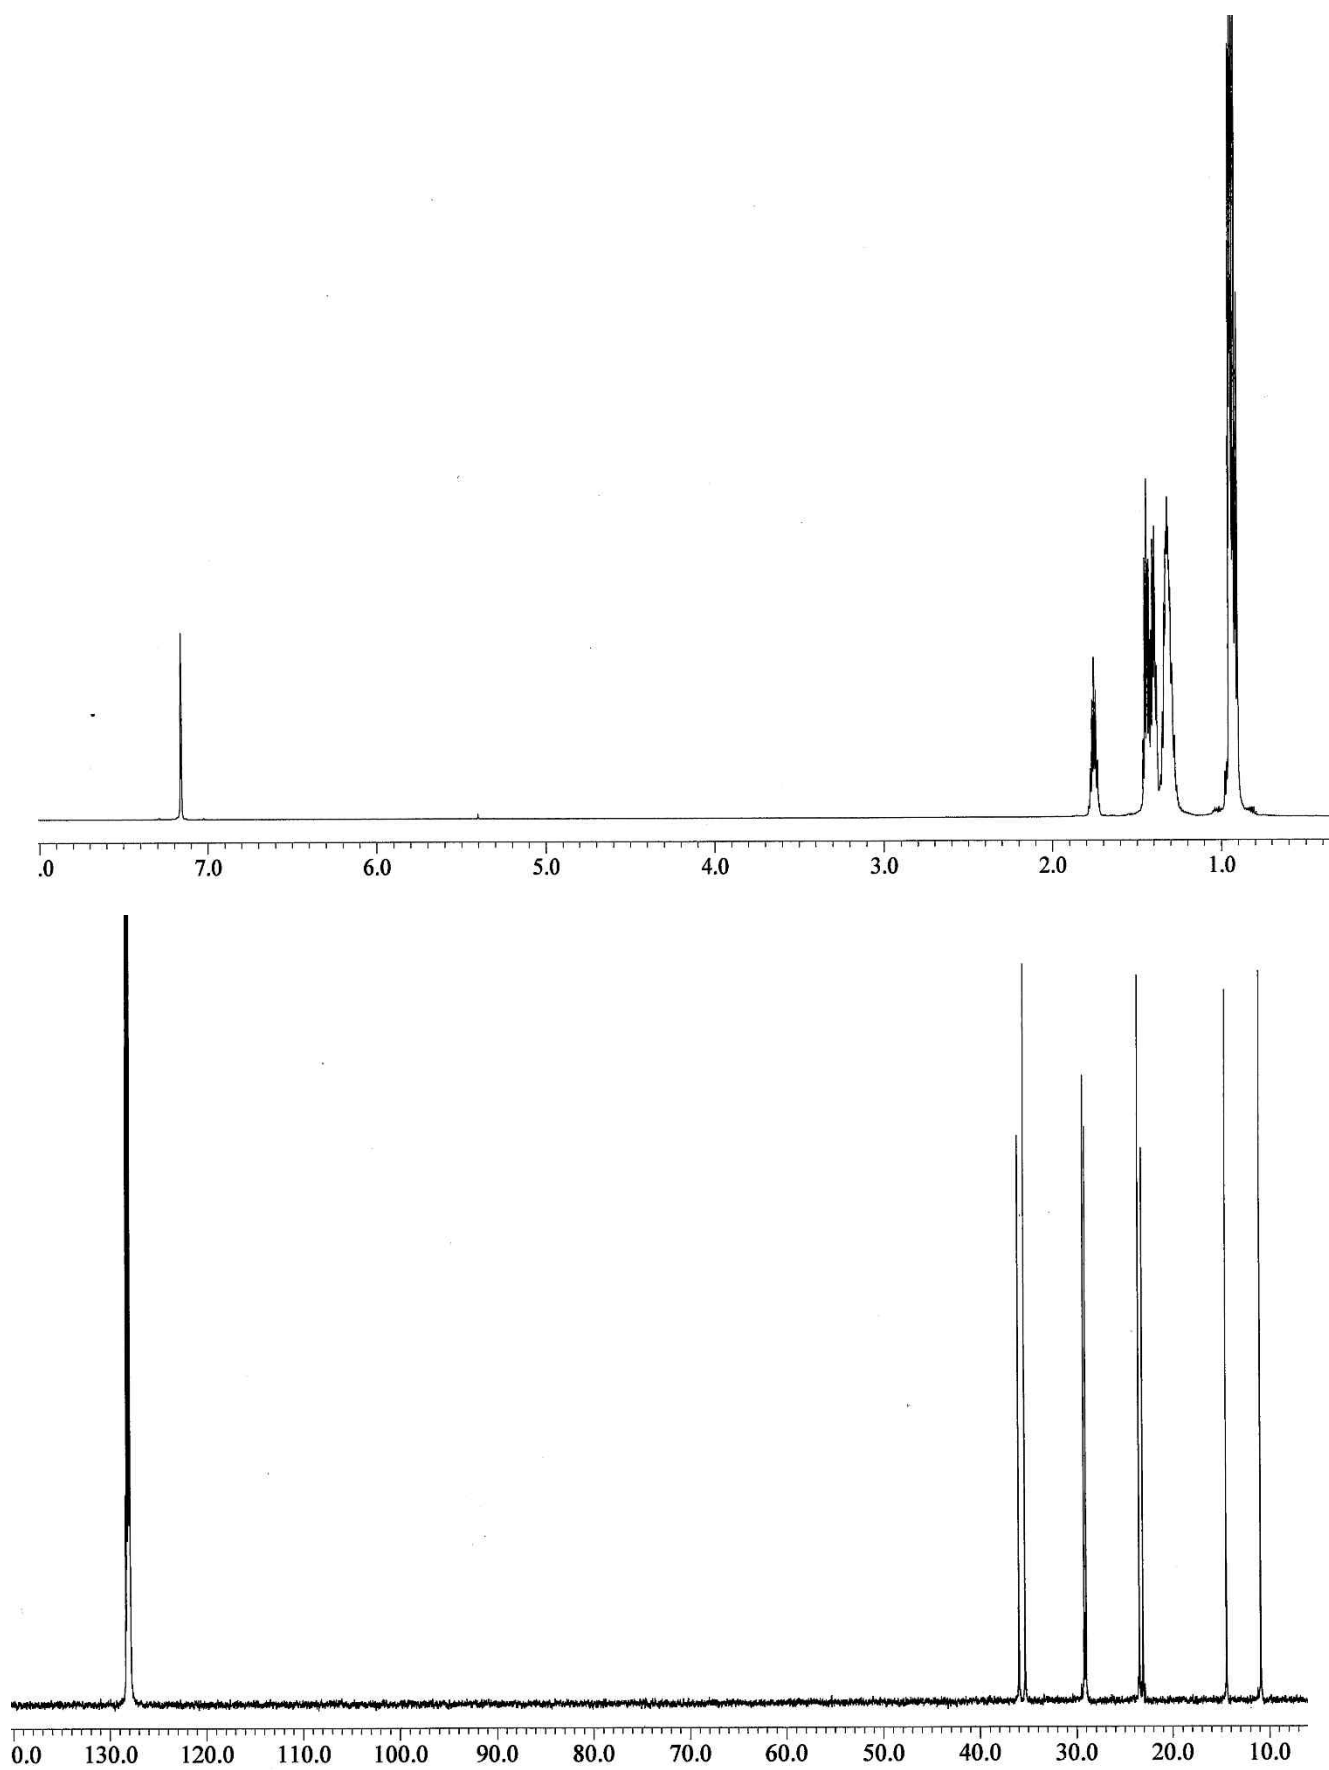

**Figure S8.**  $^1\text{H}$  and  $^{13}\text{C}$  NMR spectra of  $\text{ClSi(3,7-dimethyloctyl)}_3$  in  $\text{C}_6\text{D}_6$ .

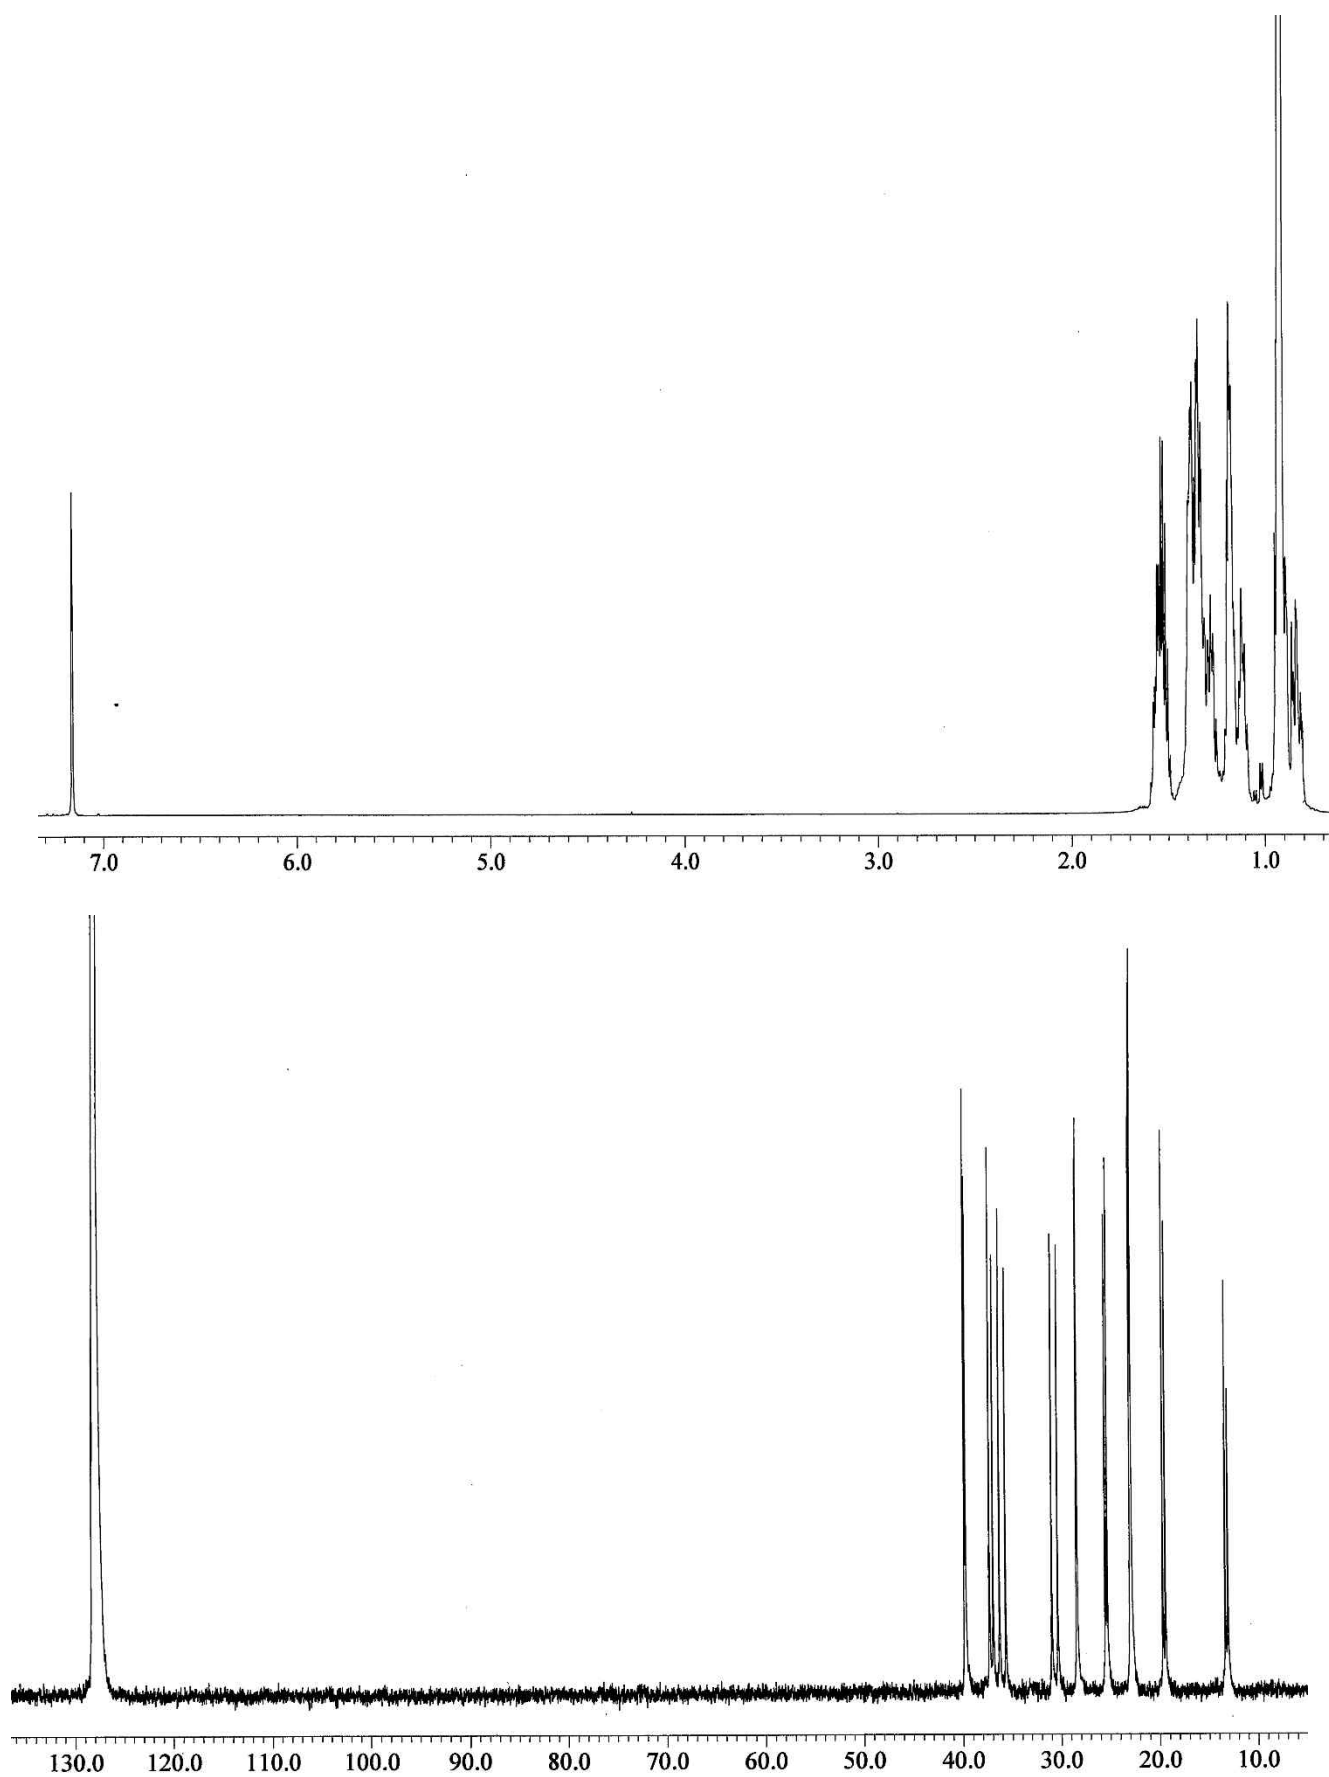

**Figure S9.**  $^1\text{H}$  and  $^{13}\text{C}$  NMR spectra of  $\text{BrC}_6\text{H}_4$ -*p*- $\text{Si}(\text{1-hexyl})_3$  in  $\text{C}_6\text{D}_6$ .

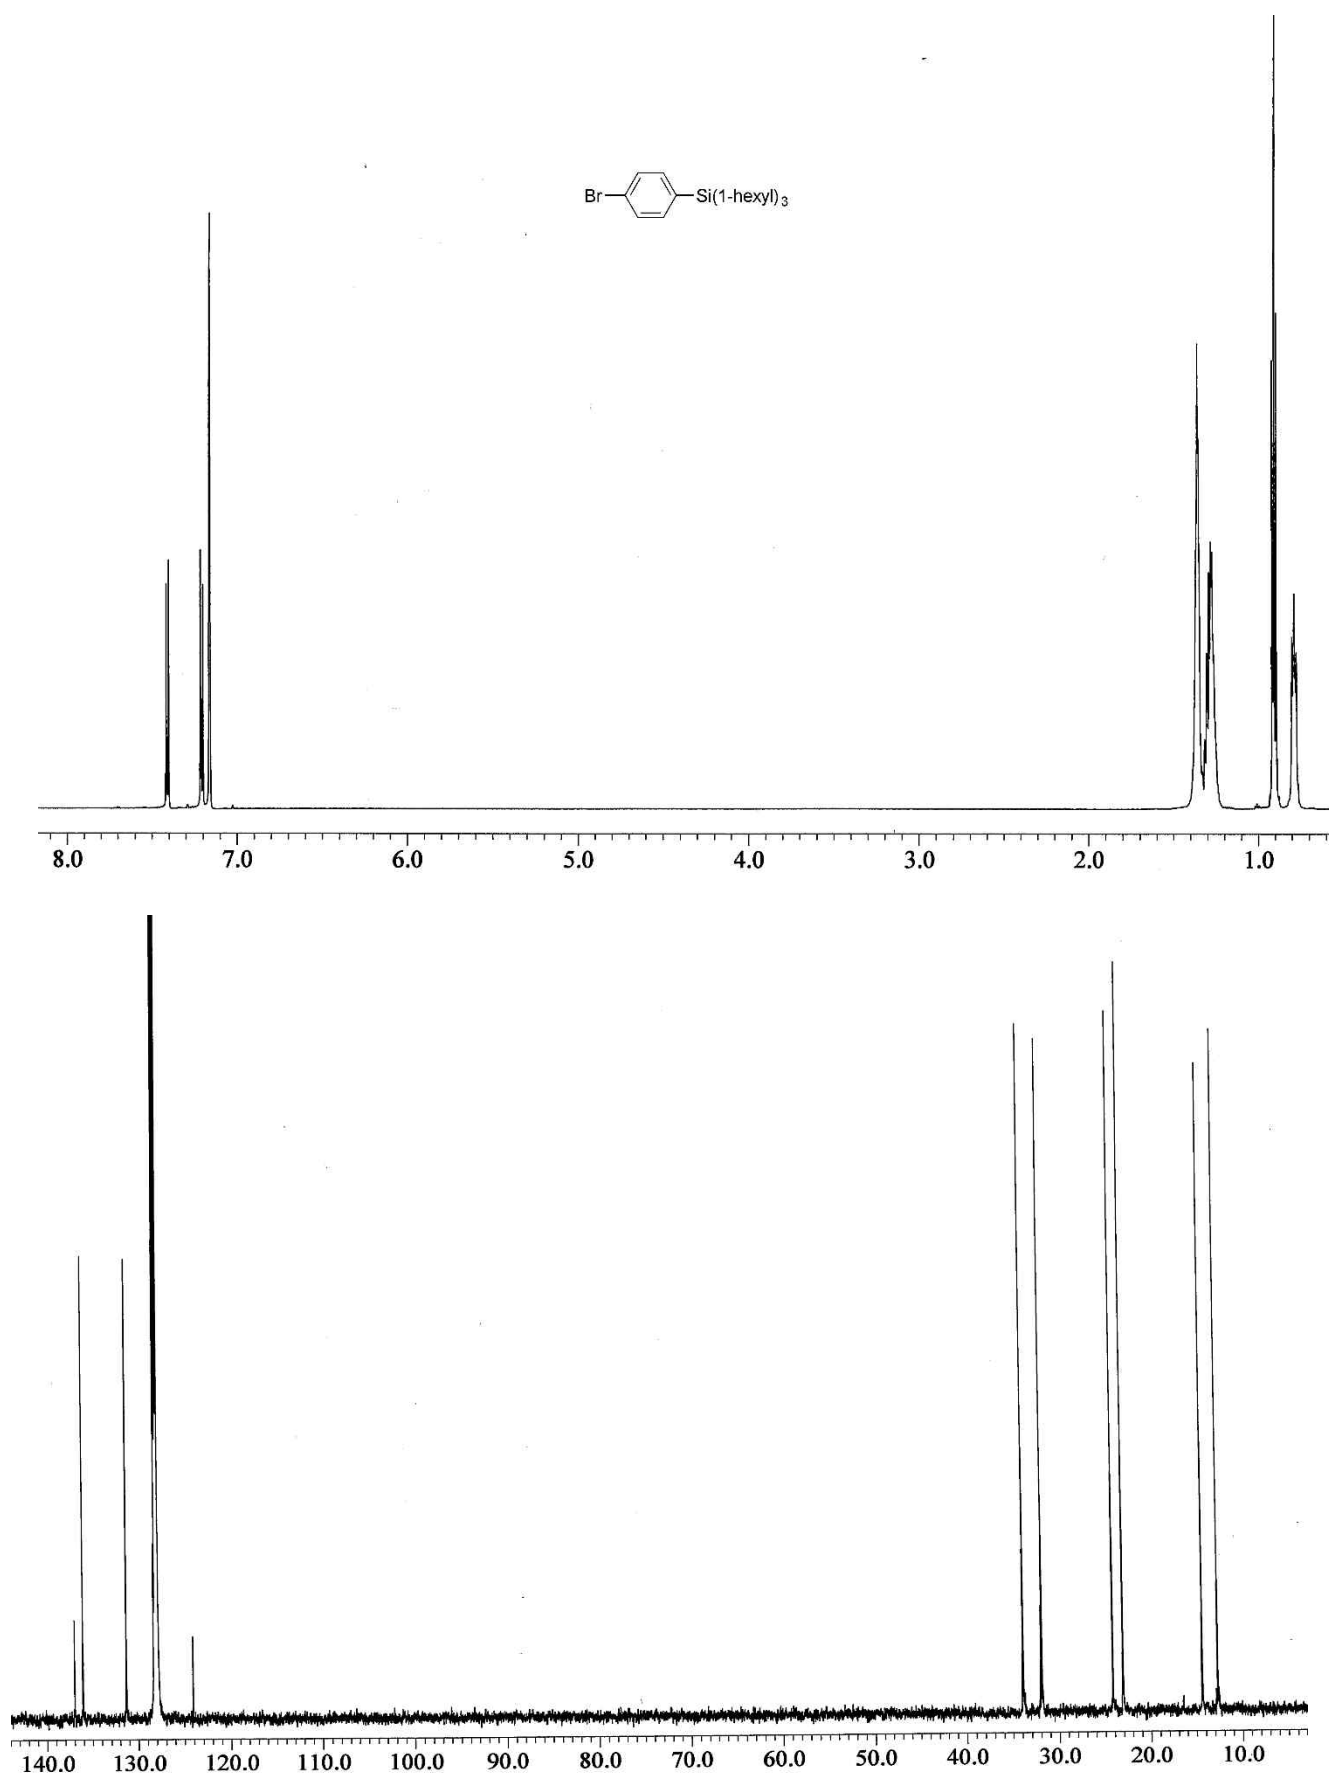

**Figure S10.**  $^1\text{H}$  and  $^{13}\text{C}$  NMR spectra of  $\text{BrC}_6\text{H}_4$ -*p*- $\text{Si}(\text{1-octyl})_3$  in  $\text{C}_6\text{D}_6$ .

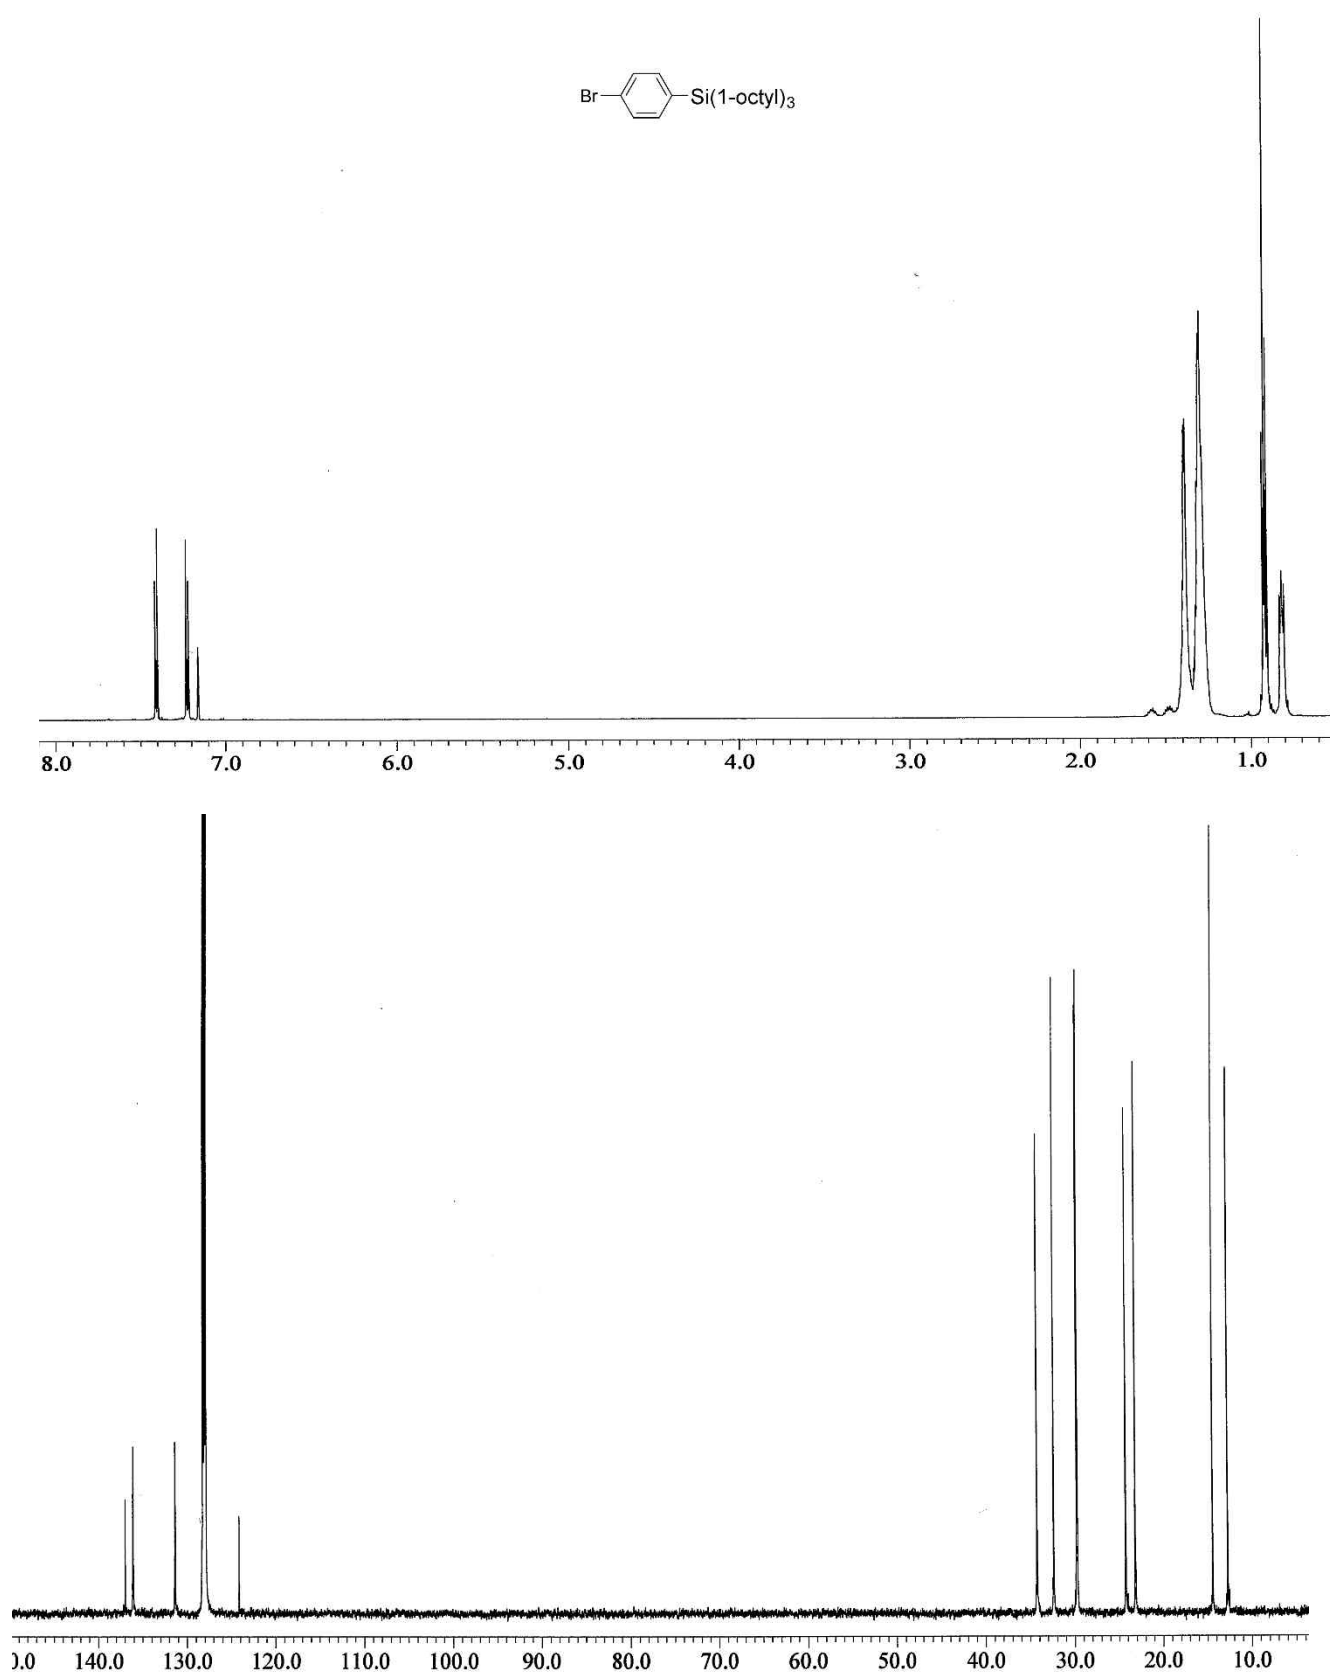

**Figure S11.**  $^1\text{H}$  and  $^{13}\text{C}$  NMR spectra of  $\text{BrC}_6\text{H}_4$ -*p*- $\text{Si}(\text{2-ethylhexyl})_3$  in  $\text{C}_6\text{D}_6$ .

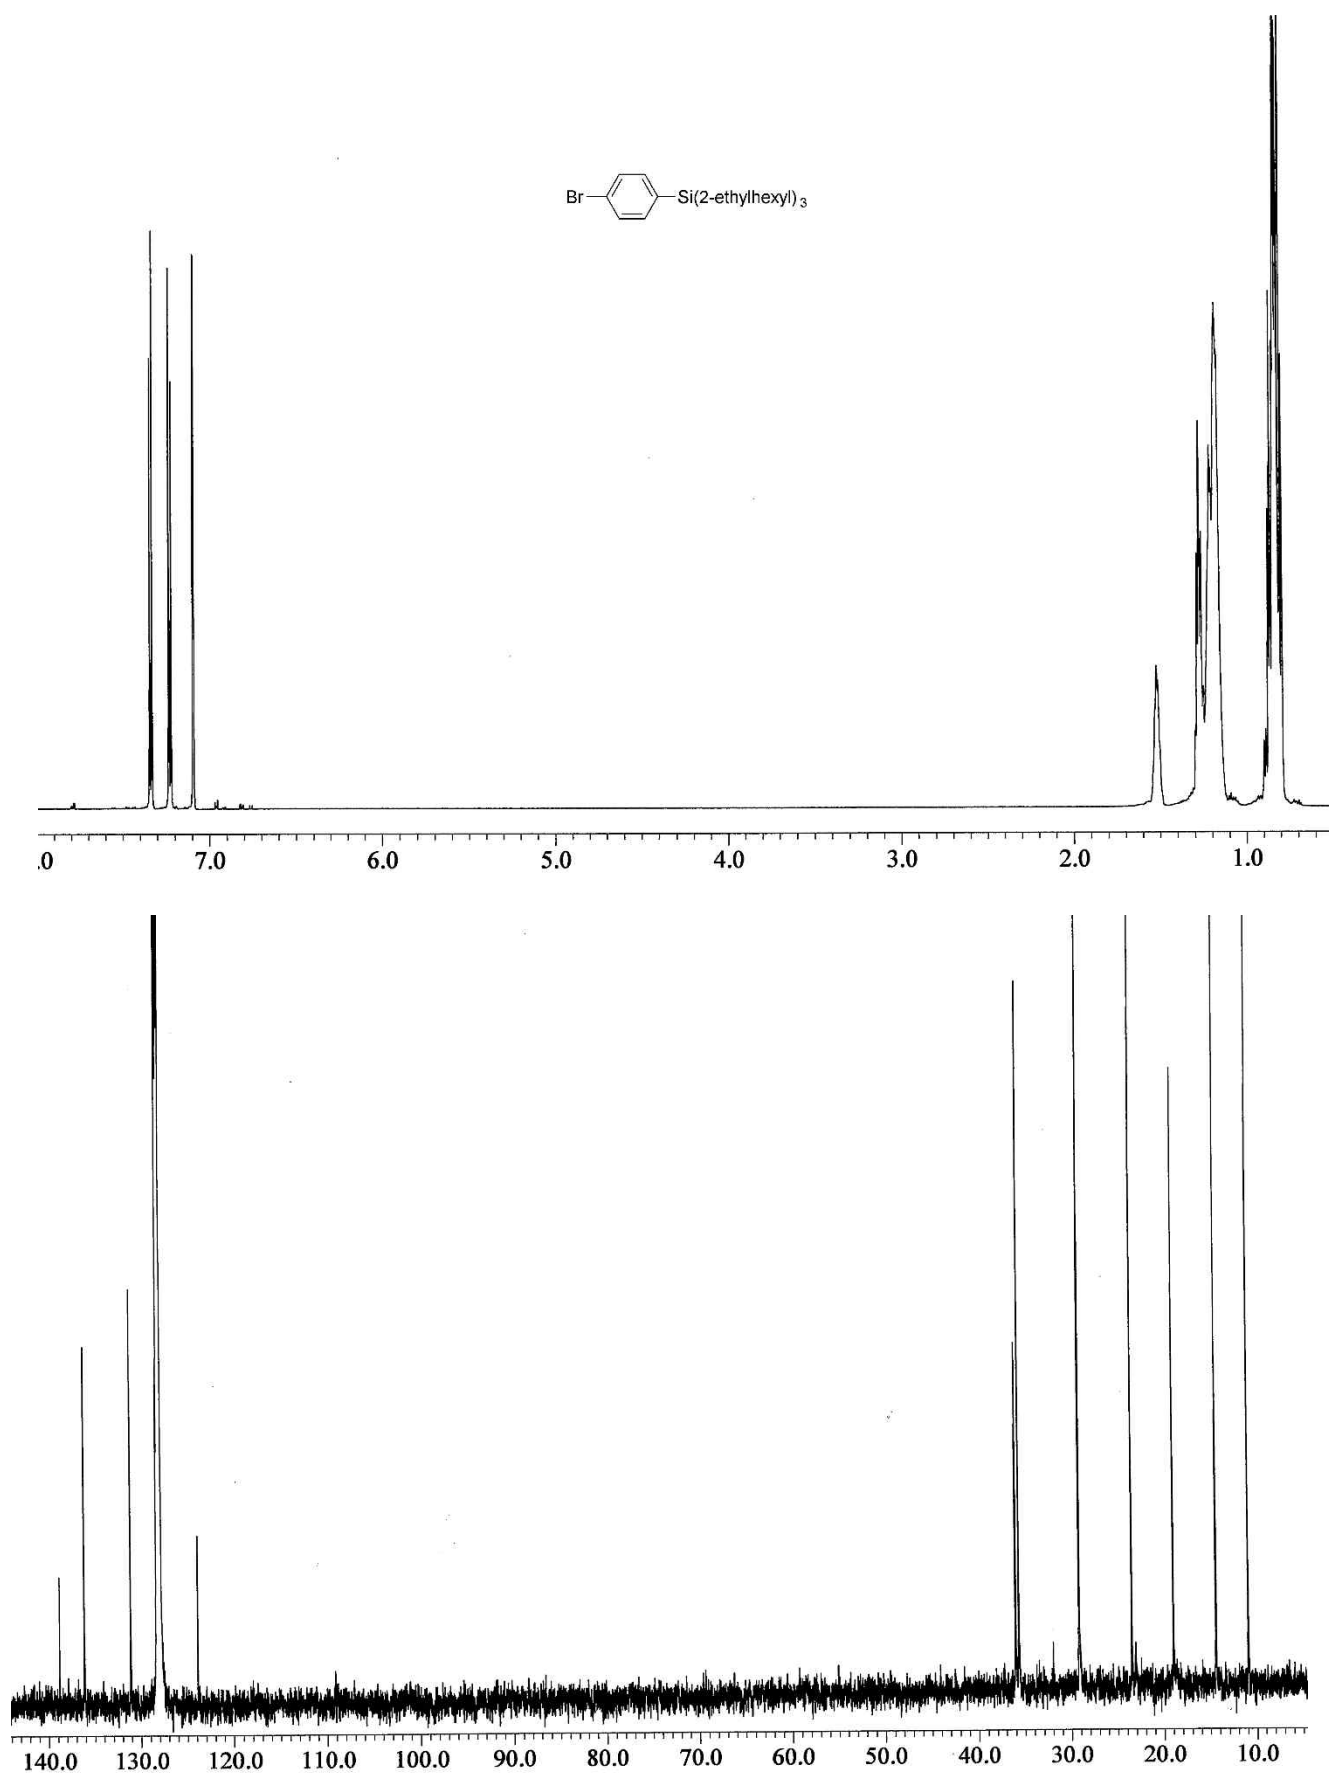

**Figure S12.**  $^1\text{H}$  and  $^{13}\text{C}$  NMR spectra of  $\text{BrC}_6\text{H}_4$ -*p*- $\text{Si}(3,7\text{-dimethyloctyl})_3$  in  $\text{C}_6\text{D}_6$ .

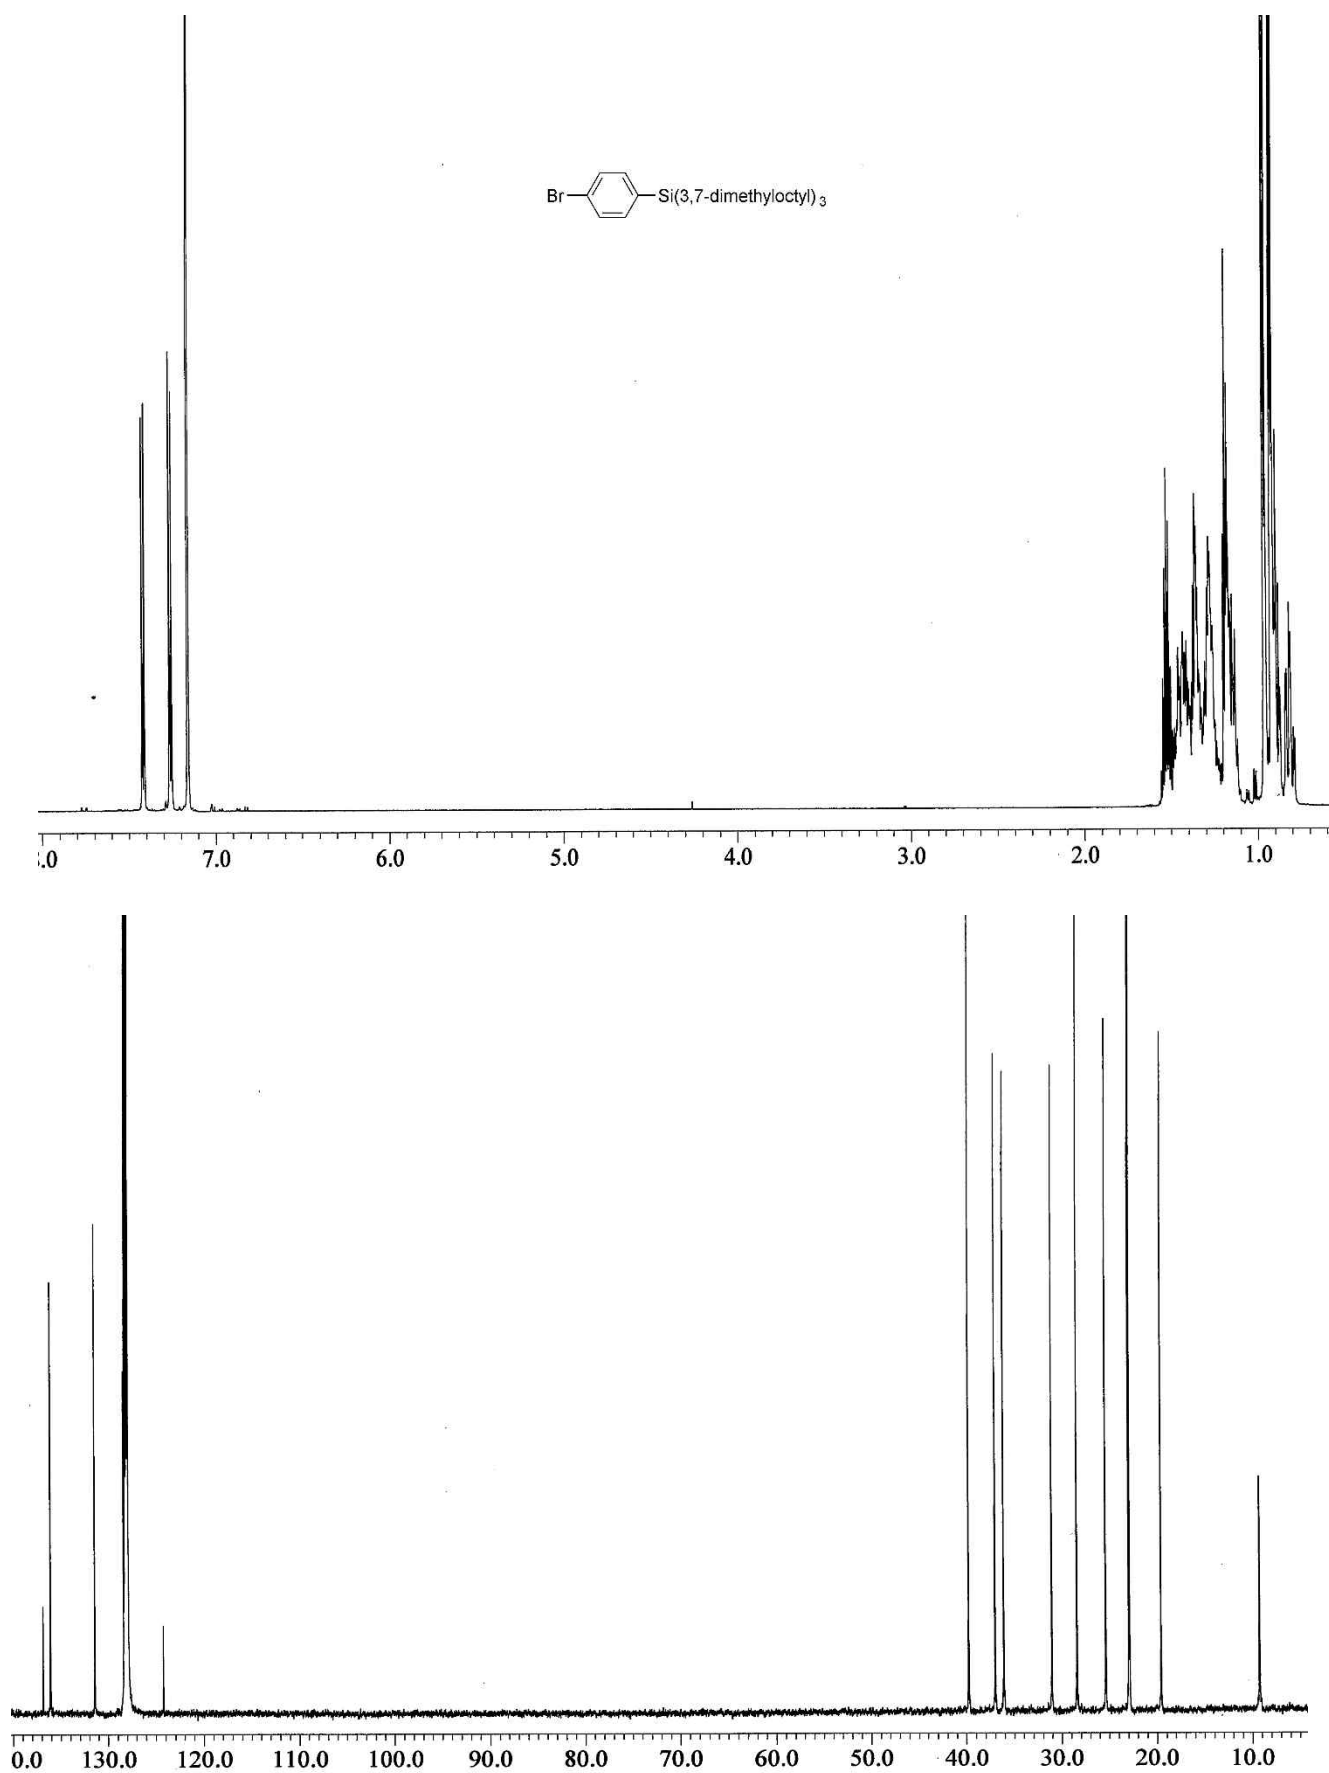

**Figure S13.**  $^1\text{H}$  and  $^{13}\text{C}$  NMR spectra of  $\text{Et}_2\text{NP}(\text{C}_6\text{H}_4\text{-}p\text{-Si(1-hexyl)}_3)_2$  in  $\text{C}_6\text{D}_6$ .

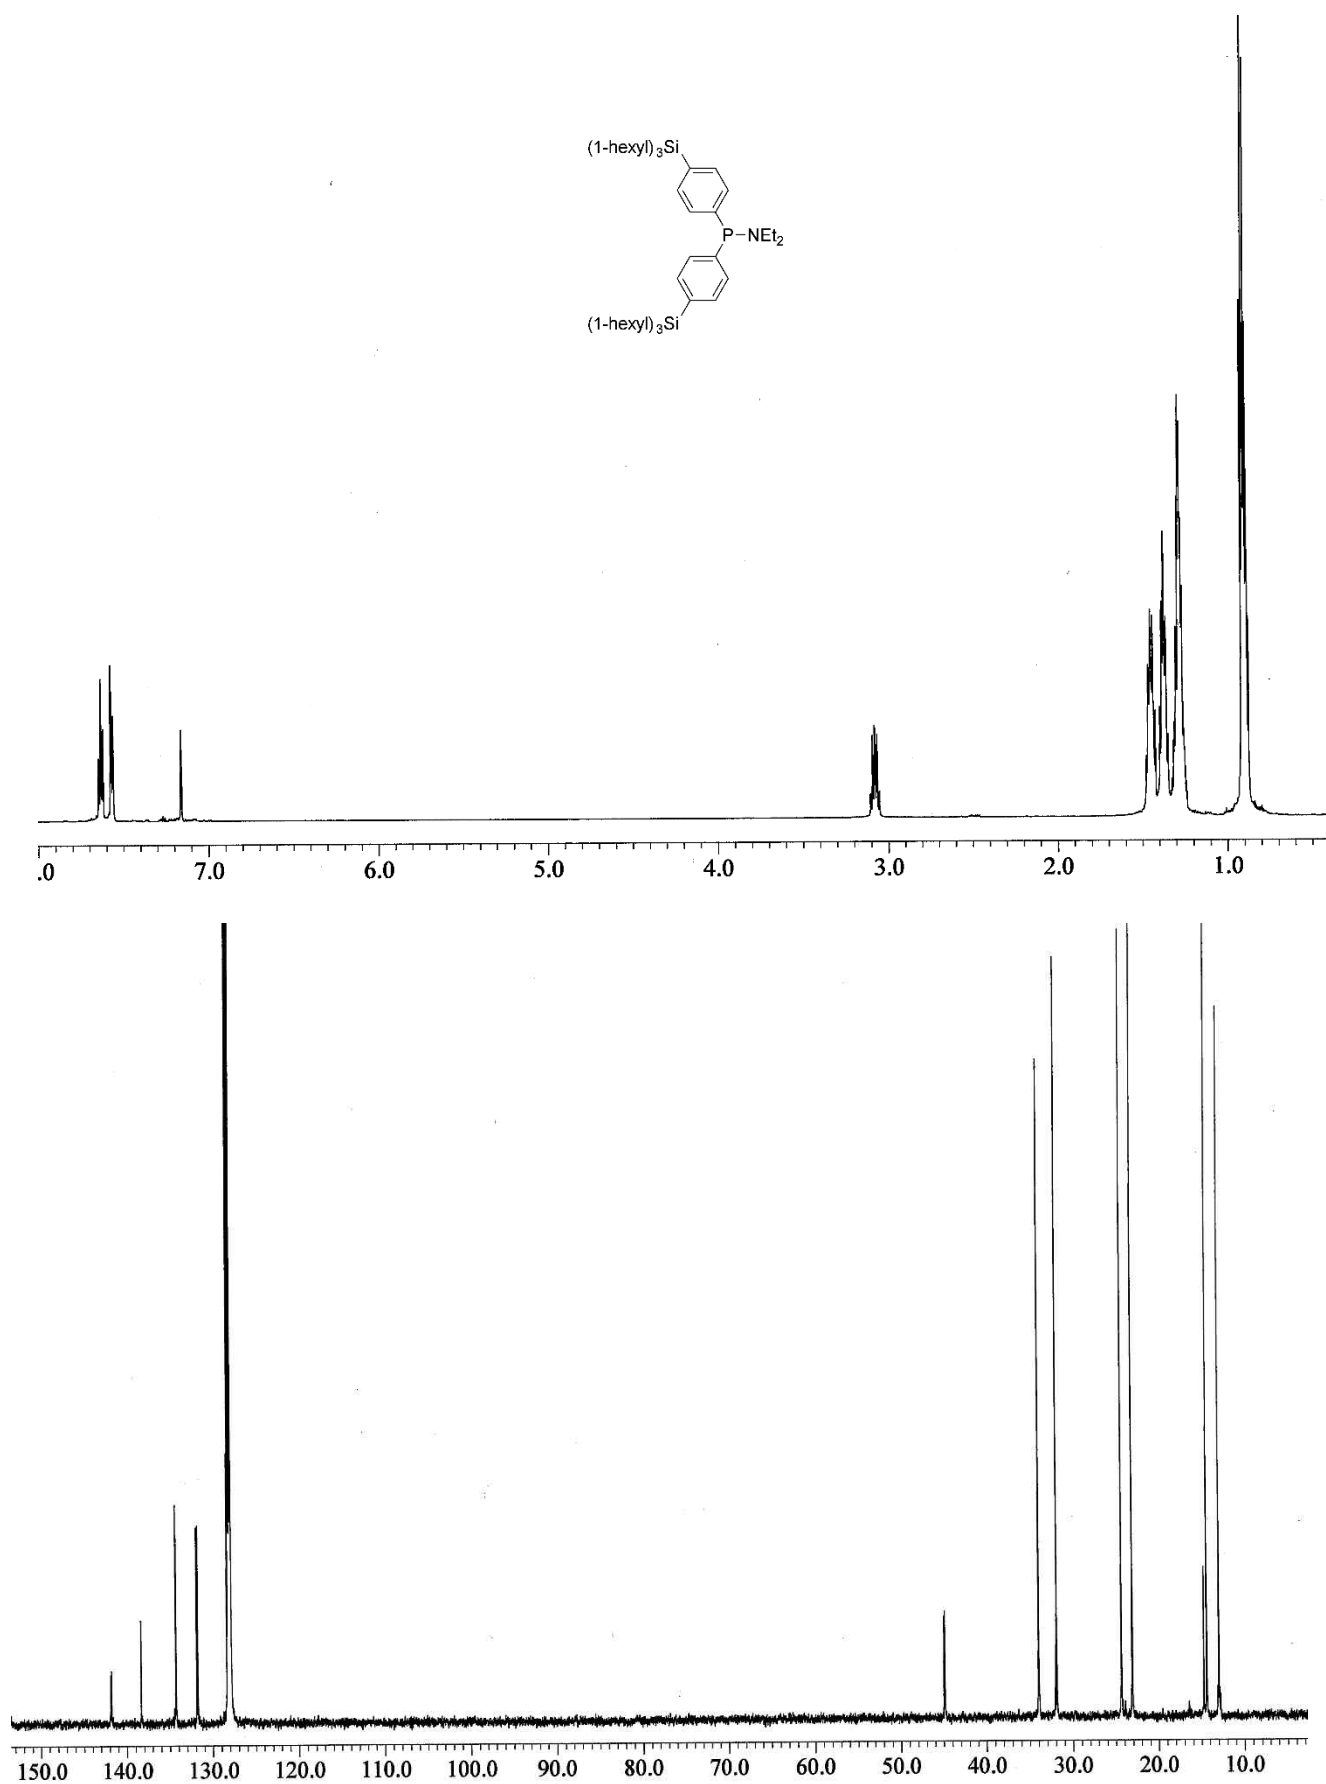

**Figure S14.**  $^1\text{H}$  and  $^{13}\text{C}$  NMR spectra of  $\text{Et}_2\text{NP}(\text{C}_6\text{H}_4\text{-}p\text{-Si}(\text{1-octyl})_3)_2$  in  $\text{C}_6\text{D}_6$ .

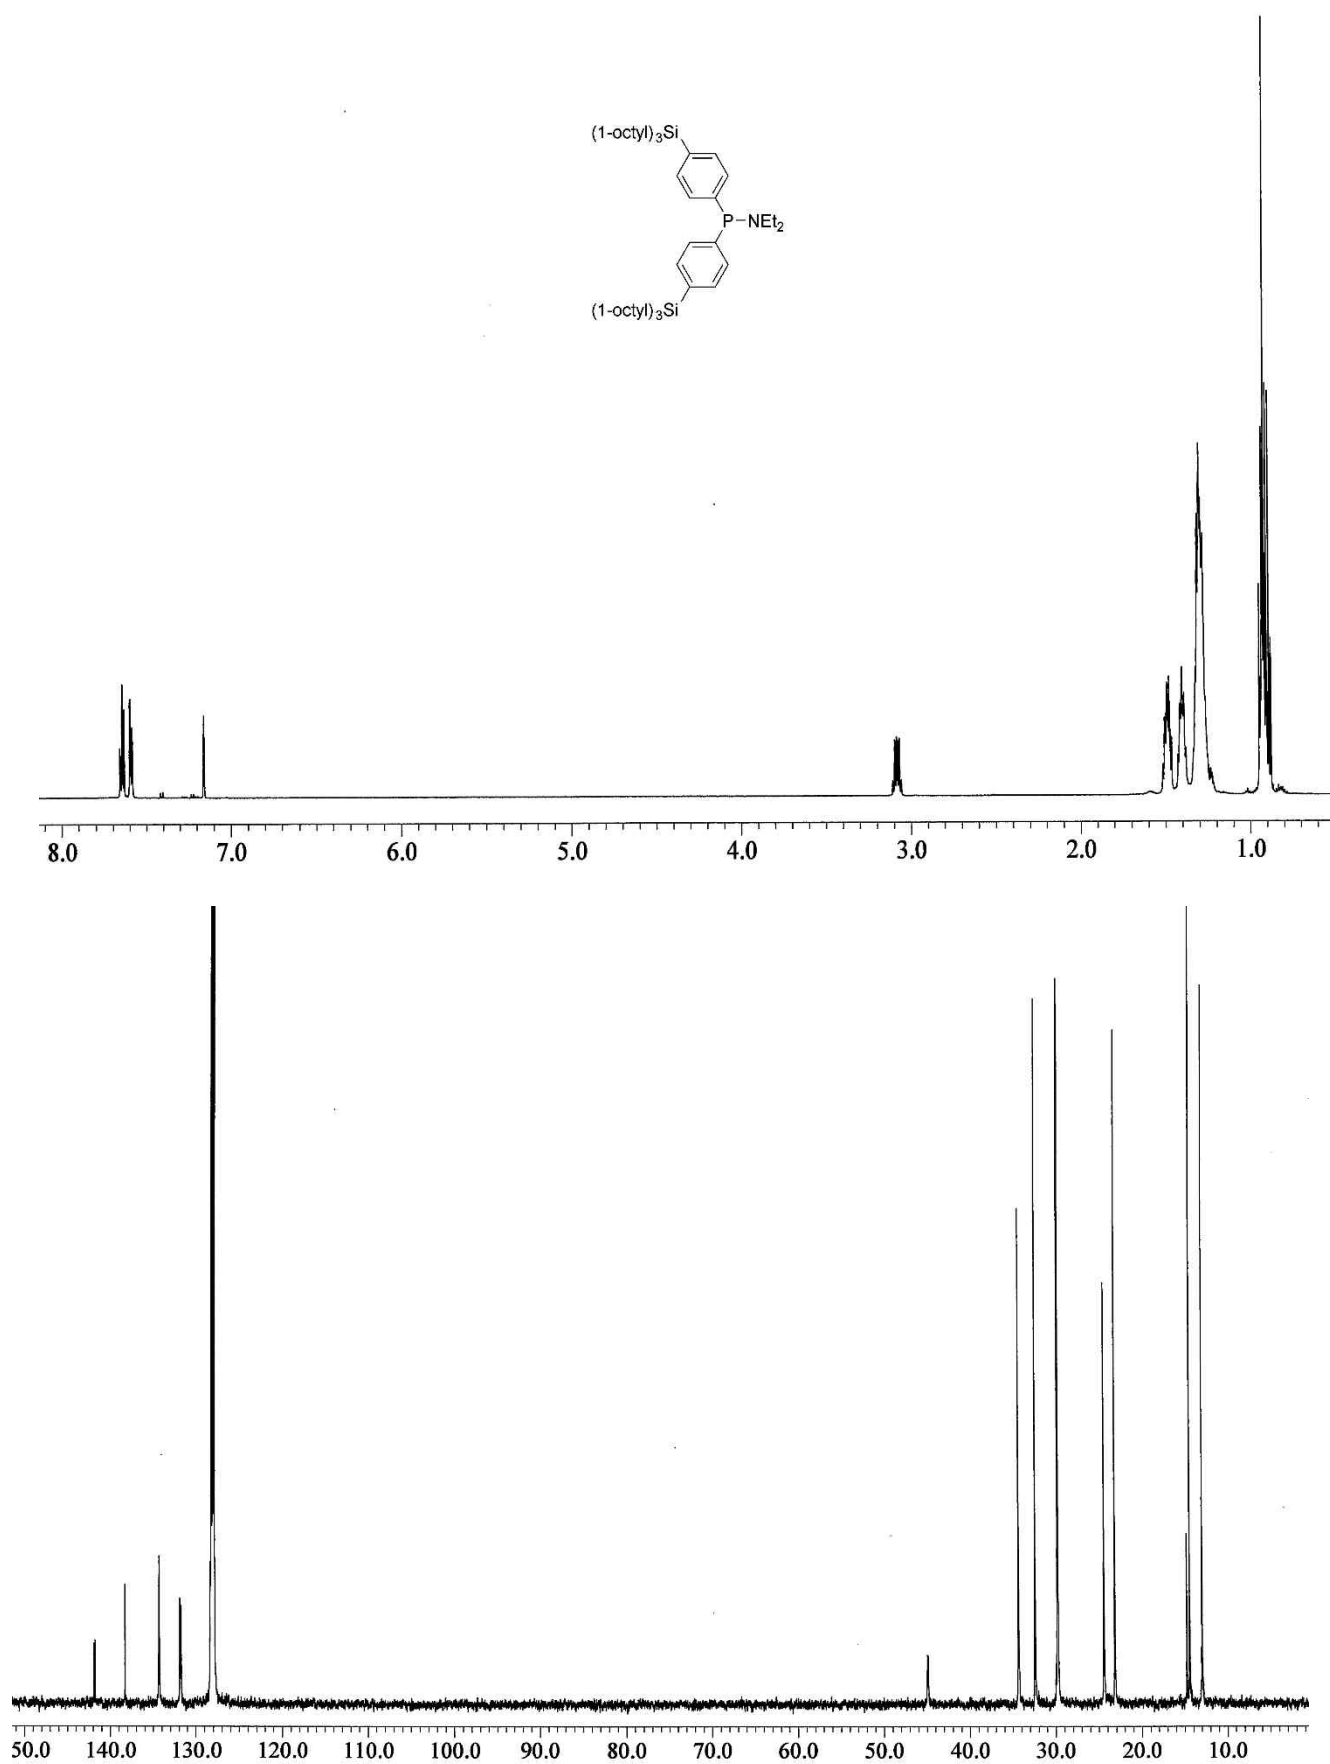

**Figure S15.**  $^1\text{H}$  and  $^{13}\text{C}$  NMR spectra of  $\text{Et}_2\text{NP}(\text{C}_6\text{H}_4\text{-}p\text{-Si(2-ethylhexyl)}_3)_2$  in  $\text{C}_6\text{D}_6$ .

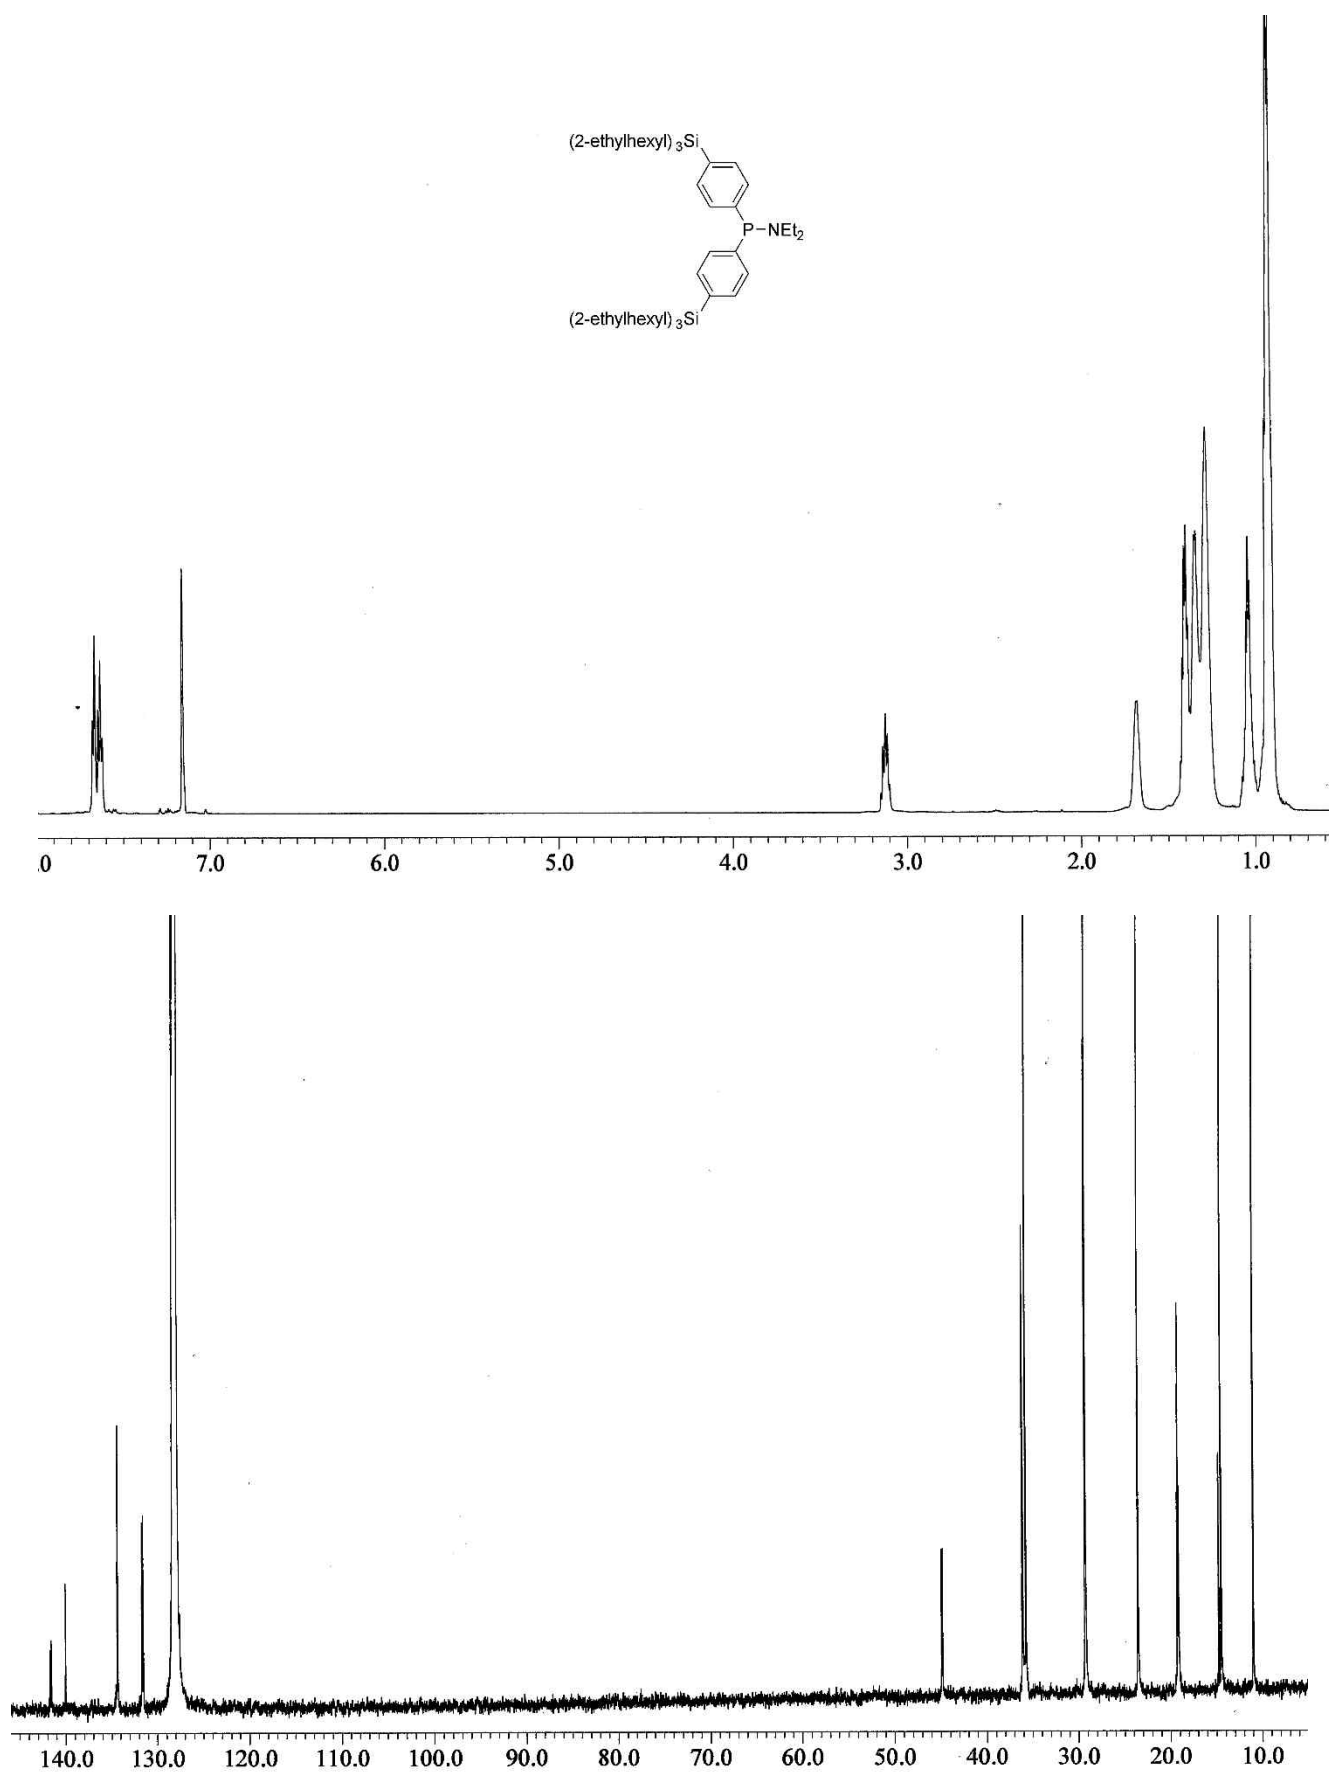

**Figure S16.**  $^1\text{H}$  and  $^{13}\text{C}$  NMR spectra of  $\text{Et}_2\text{NP}(\text{C}_6\text{H}_4\text{-}p\text{-Si}(\text{3,7-dimethyloctyl})_3)_2$  in  $\text{C}_6\text{D}_6$ .

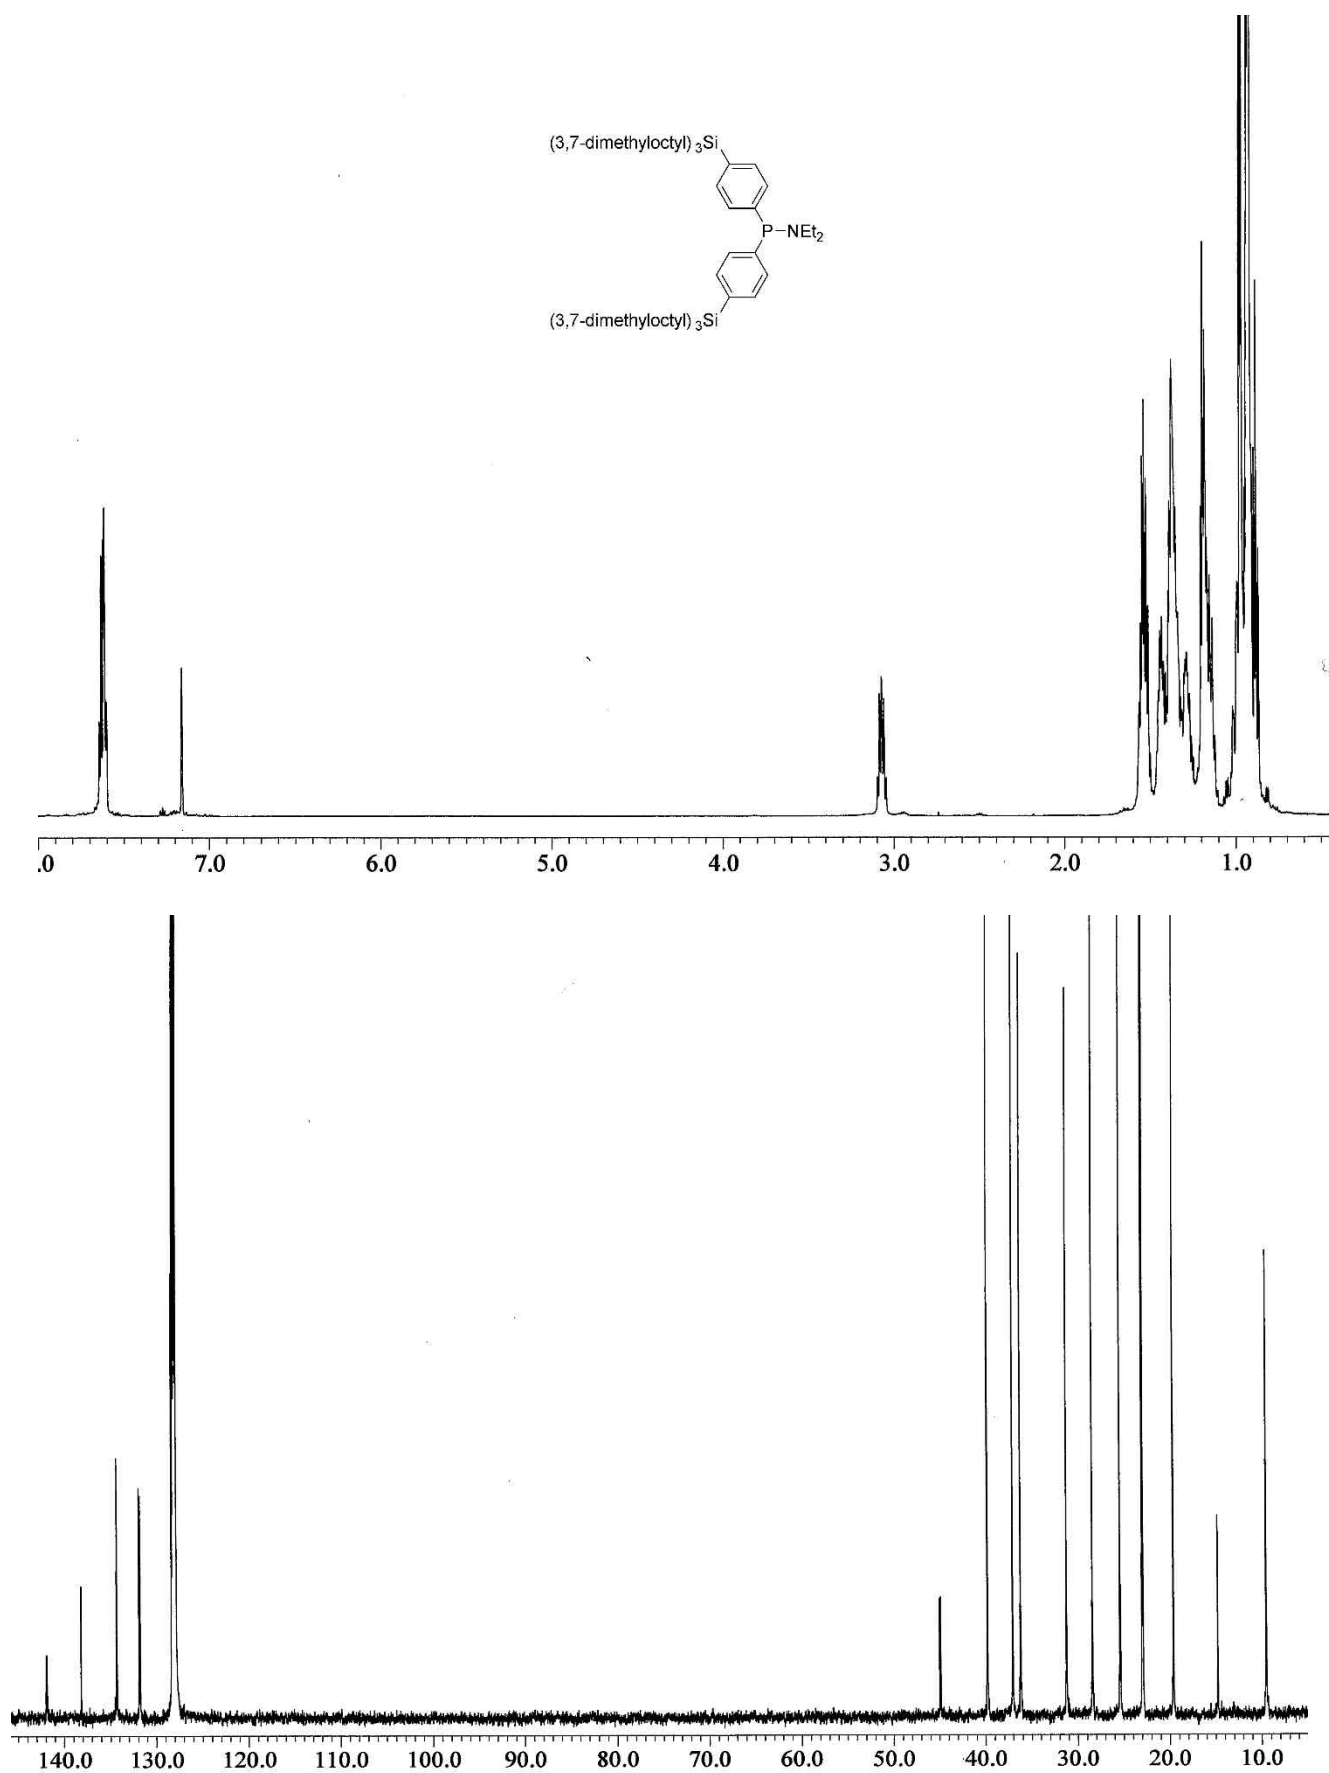

**Figure S17.**  $^1\text{H}$  and  $^{13}\text{C}$  NMR spectra of  $\text{ClP}(\text{C}_6\text{H}_4\text{-}p\text{-Si}(\text{1-hexyl})_3)_2$  in  $\text{C}_6\text{D}_6$ .

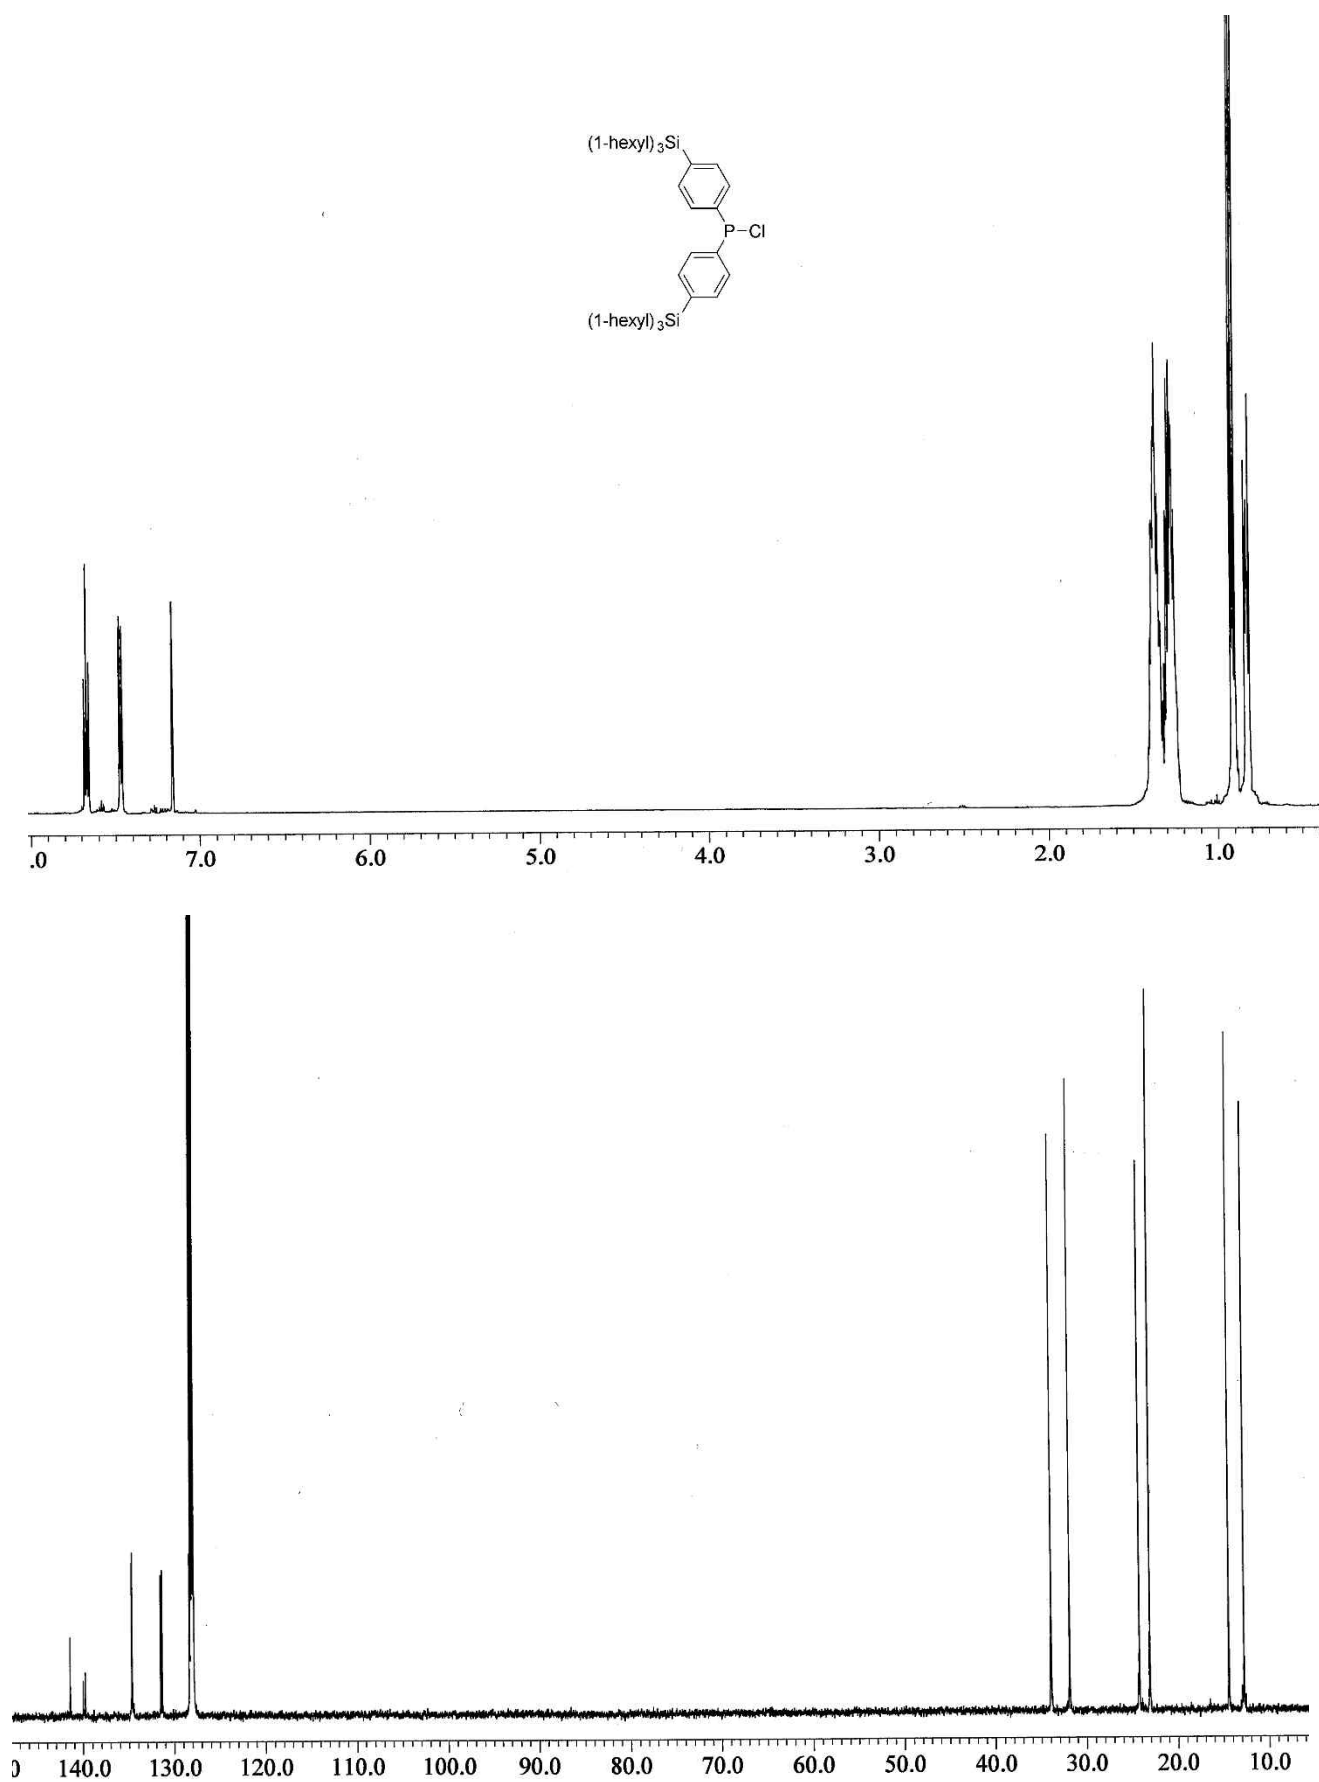

**Figure S18.**  $^1\text{H}$  and  $^{13}\text{C}$  NMR spectra of  $\text{ClP}(\text{C}_6\text{H}_4\text{-}p\text{-Si}(\text{1-octyl})_3)_2$  in  $\text{C}_6\text{D}_6$ .

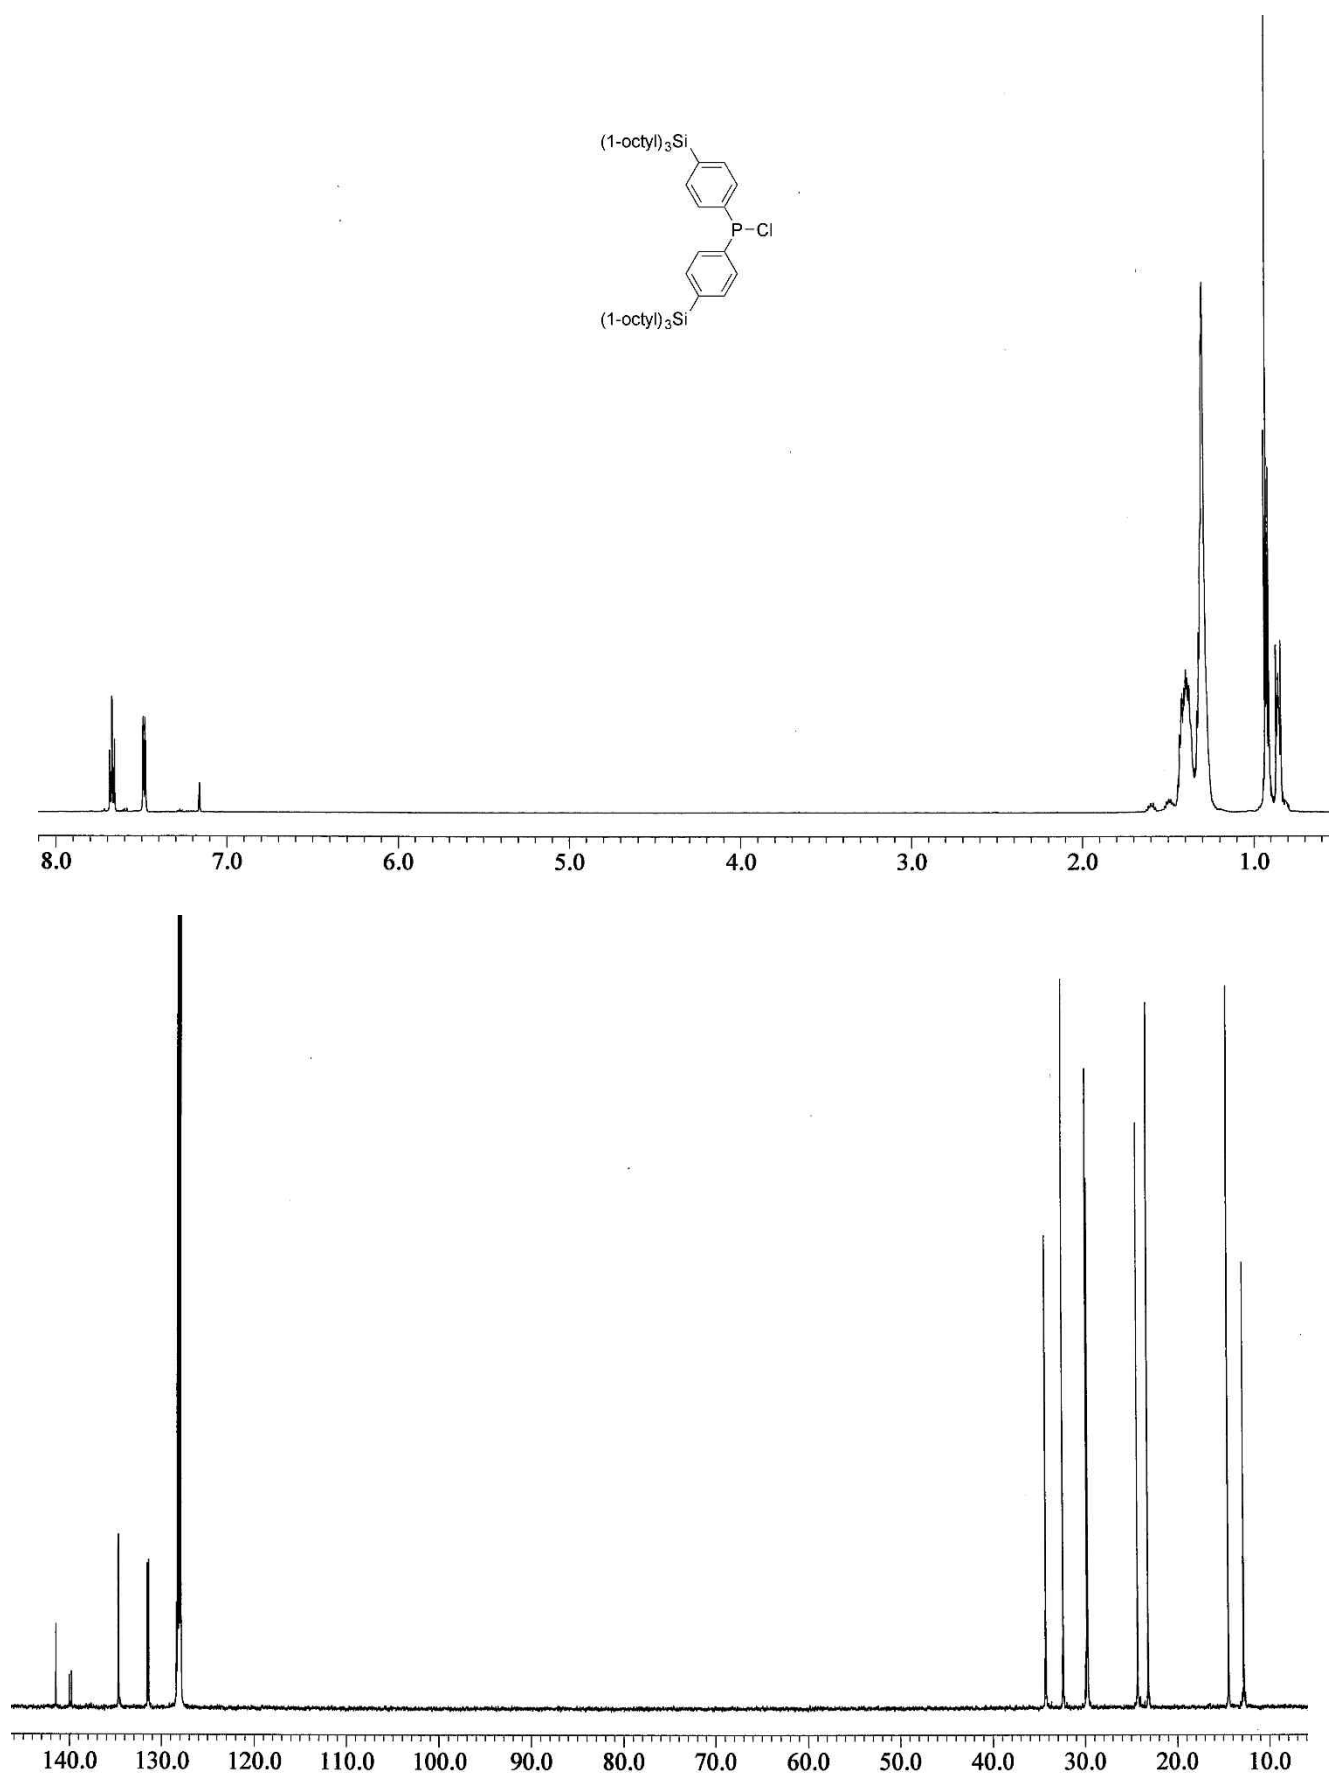

**Figure S19.**  $^1\text{H}$  and  $^{13}\text{C}$  NMR spectra of  $\text{ClP}(\text{C}_6\text{H}_4\text{-}p\text{-Si}(\text{2-ethylhexyl})_3)_2$  in  $\text{C}_6\text{D}_6$ .

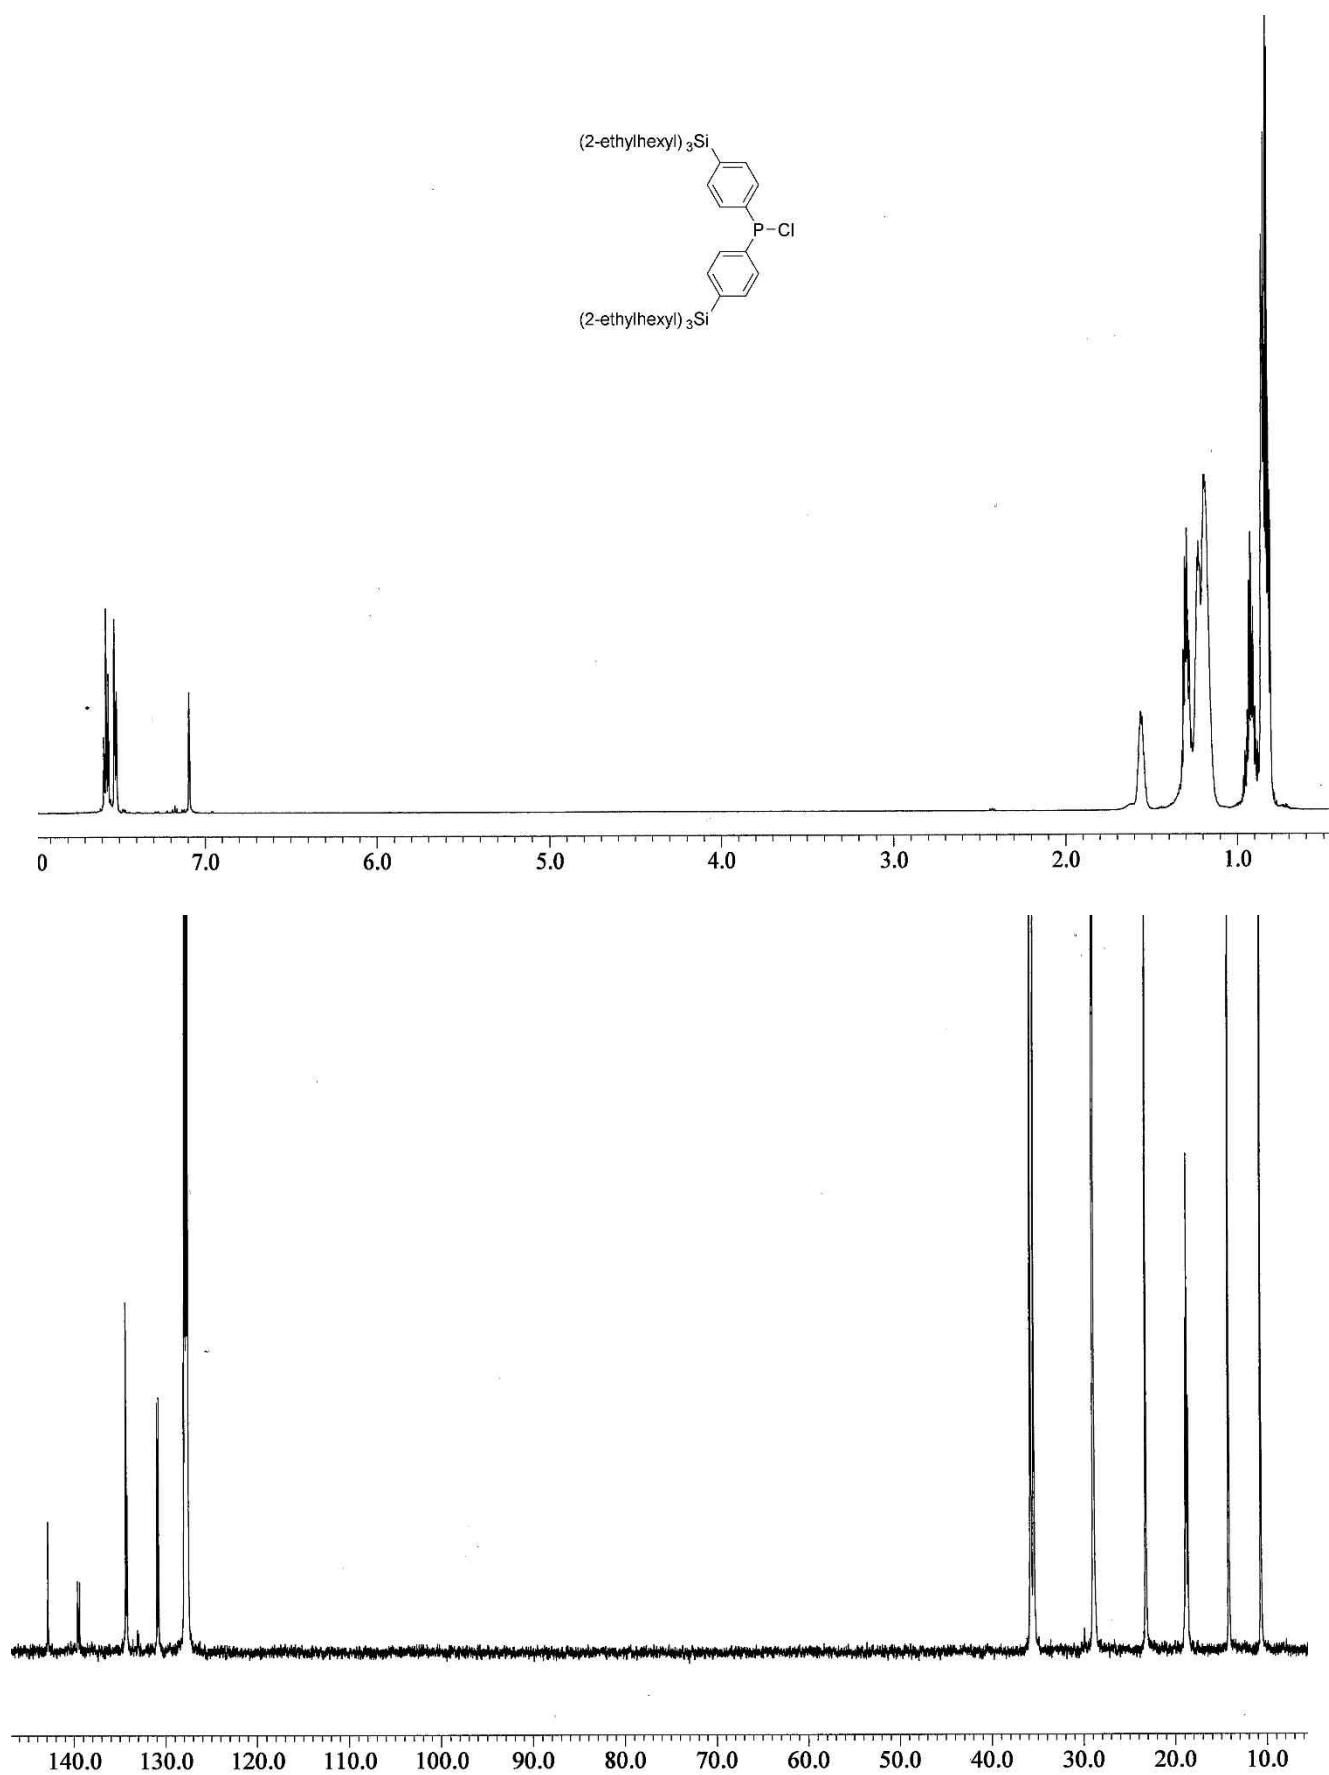

**Figure S20.**  $^1\text{H}$  and  $^{13}\text{C}$  NMR spectra of  $\text{ClP}(\text{C}_6\text{H}_4\text{-}p\text{-Si}(\text{3,7-dimethyloctyl})_3)_2$  in  $\text{C}_6\text{D}_6$ .

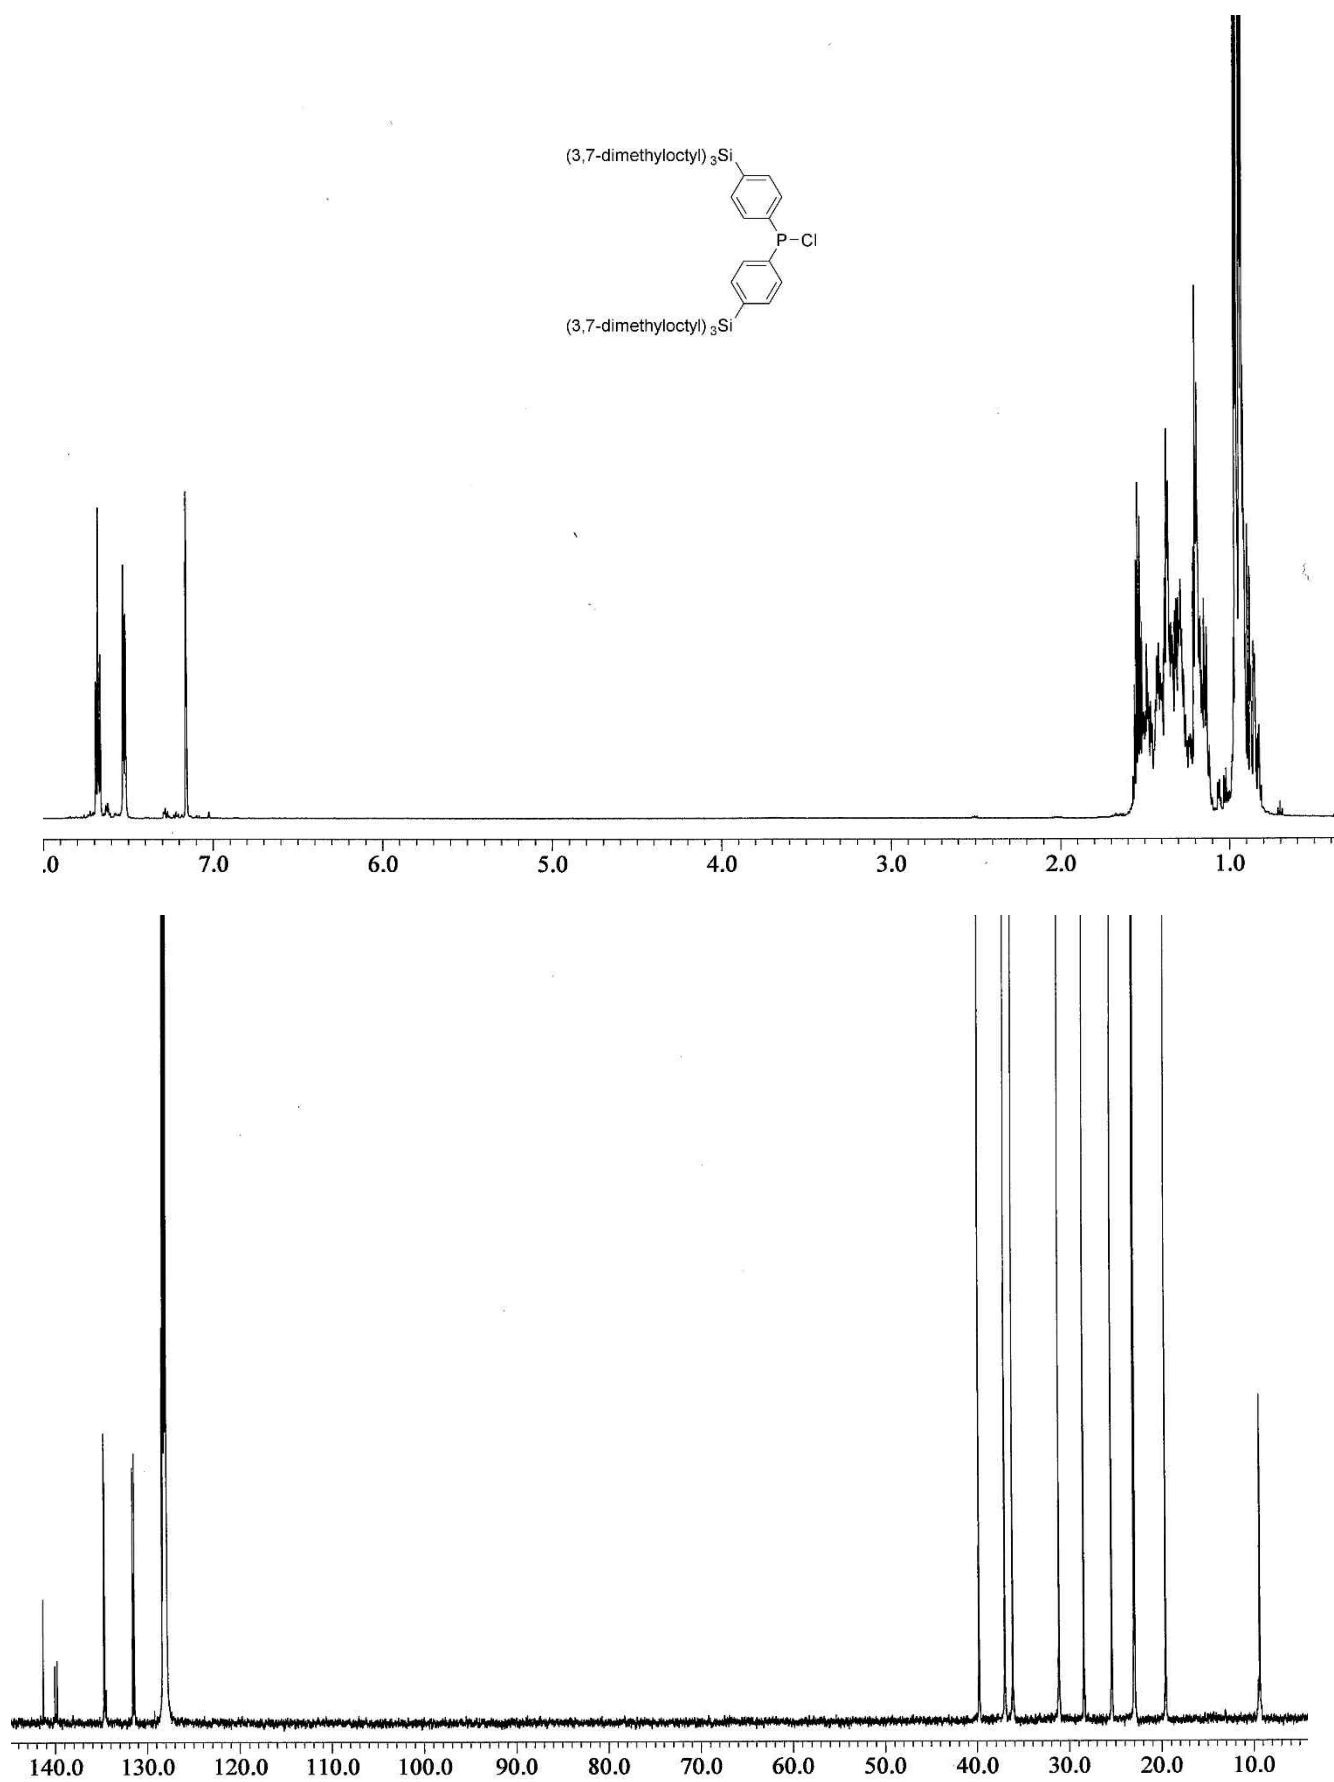

**Figure S21.**  $^1\text{H}$  and  $^{13}\text{C}$  NMR spectra of  $\text{iPrN}(\text{PAR}_2)_2$  ( $\text{Ar} = -\text{C}_6\text{H}_4\text{-}p\text{-Si(1-hexyl)}_3$ ) in  $\text{C}_6\text{D}_6$ .

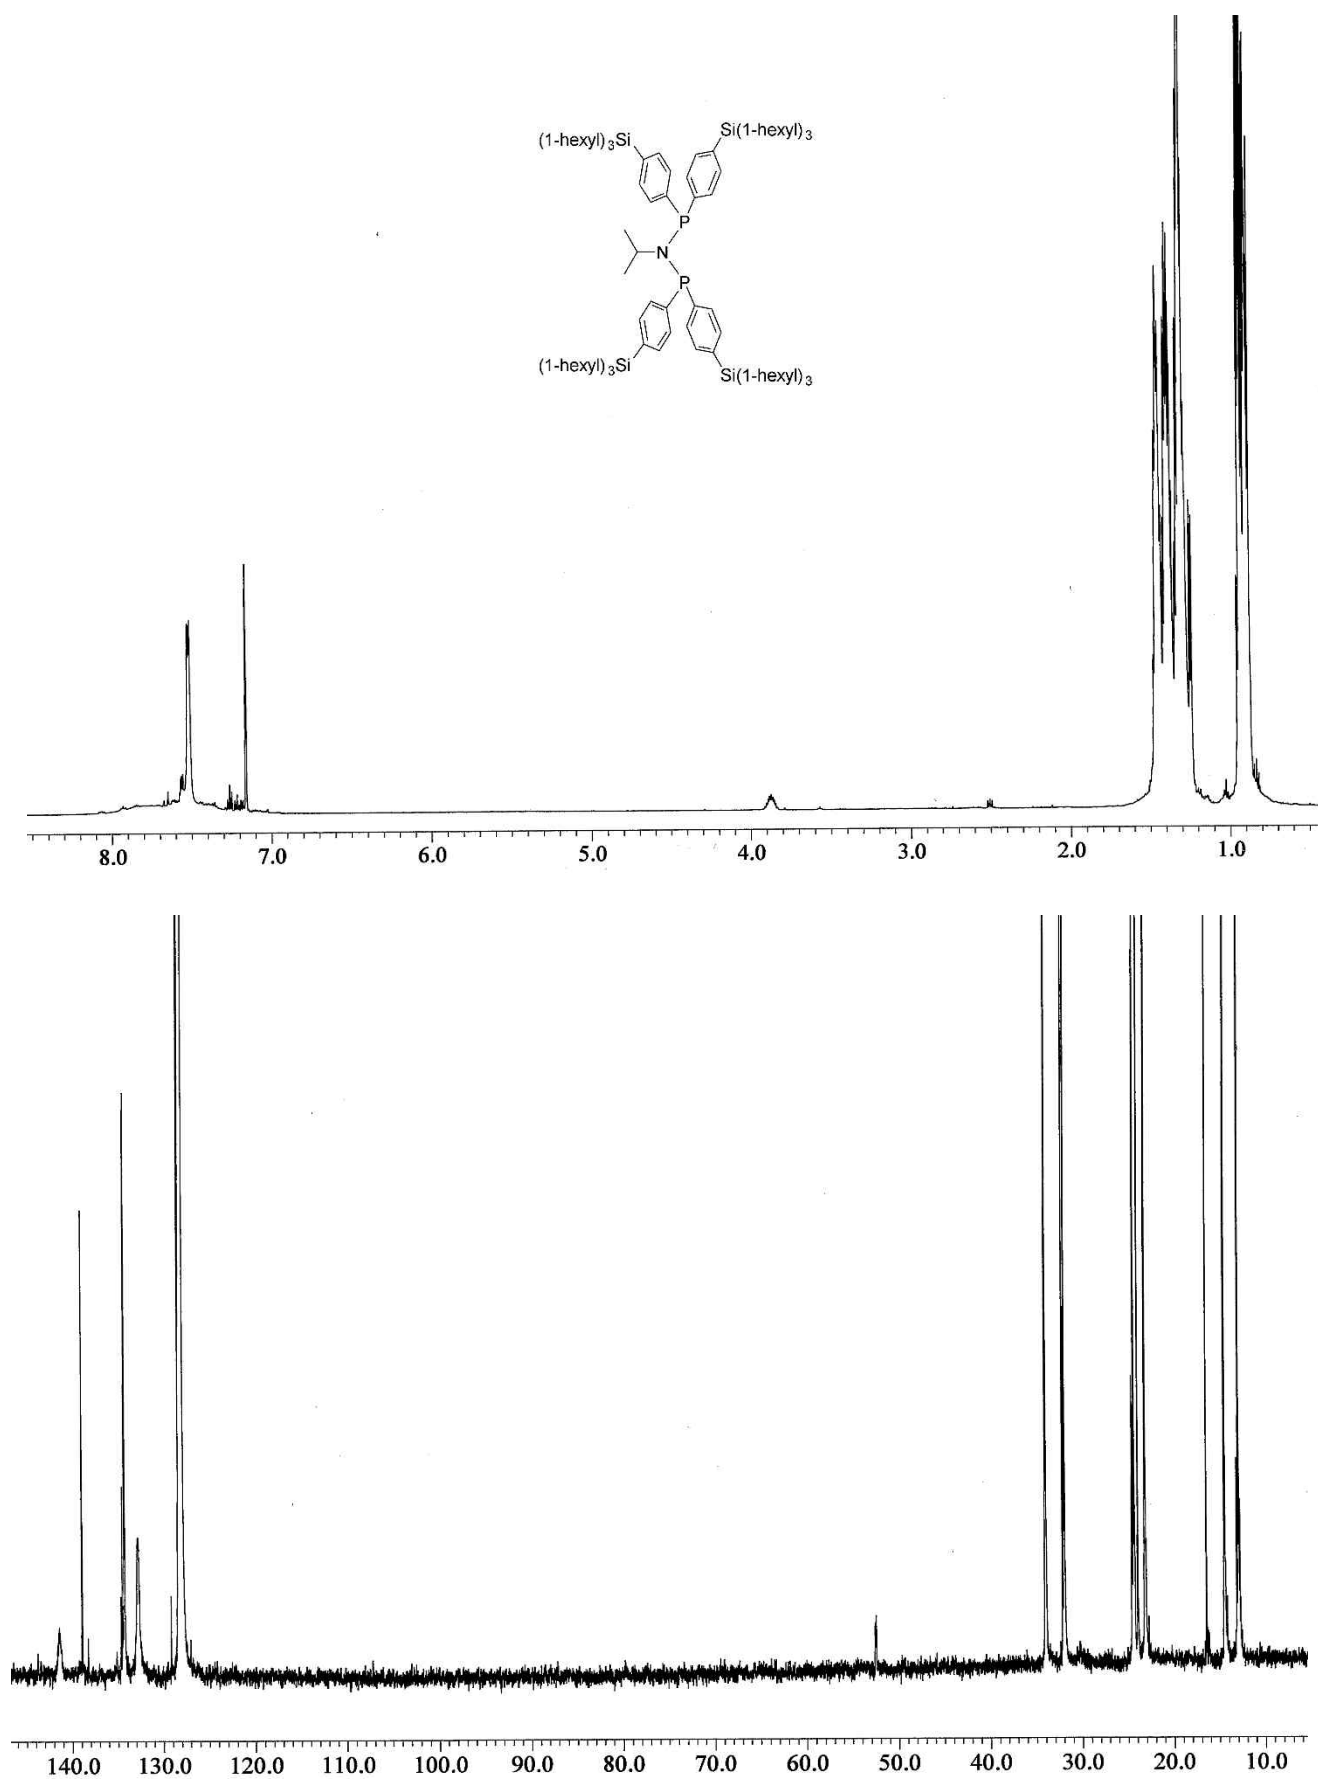

**Figure S22.**  $^1\text{H}$  and  $^{13}\text{C}$  NMR spectra of  $\text{iPrN}(\text{PAr}_2)_2$  ( $\text{Ar} = -\text{C}_6\text{H}_4\text{-}p\text{-Si}(\text{1-octyl})_3$ ) in  $\text{C}_6\text{D}_6$ .

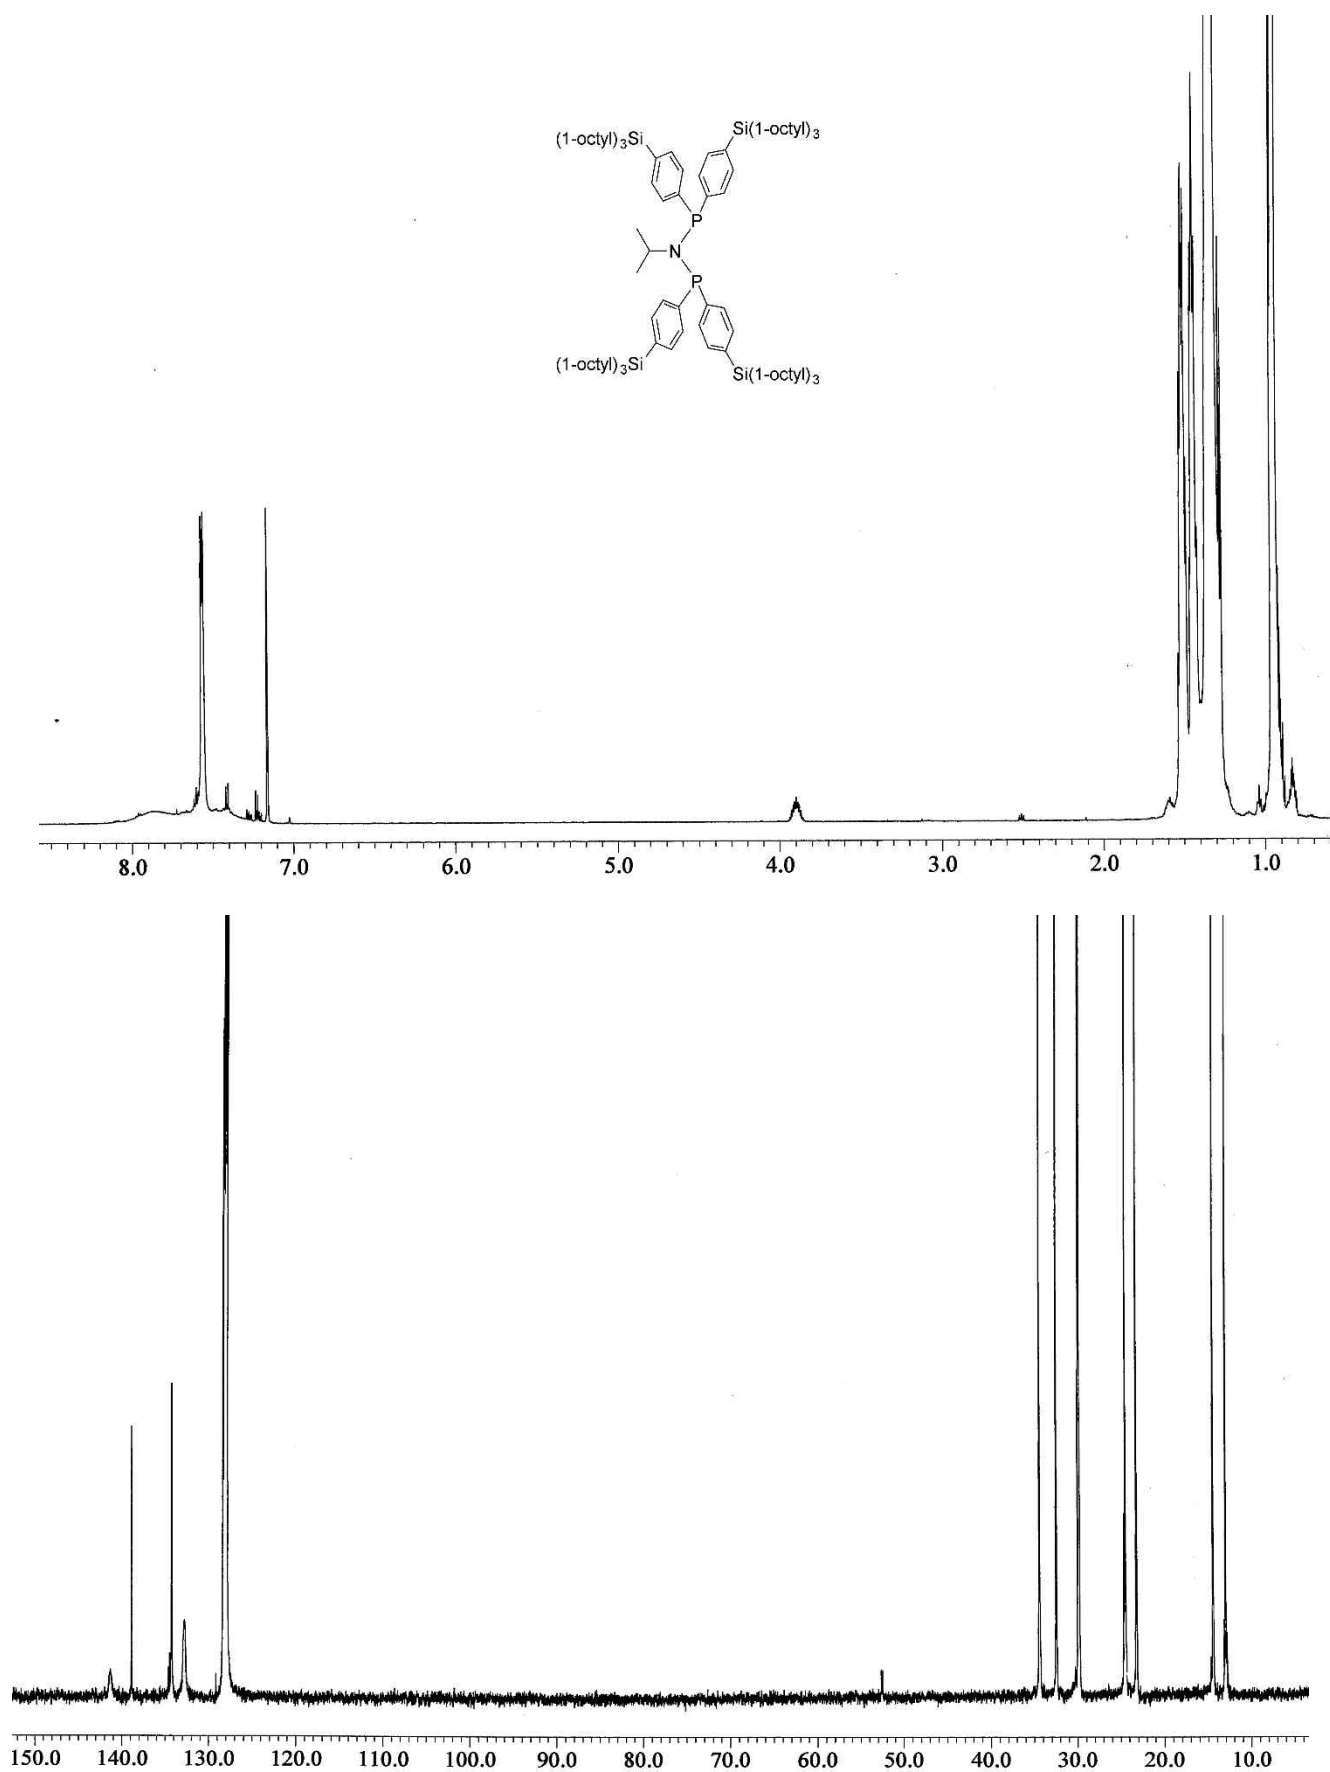

**Figure S23.**  $^1\text{H}$  and  $^{13}\text{C}$  NMR spectra of  $\text{iPrN}(\text{PAR}_2)_2$  ( $\text{Ar} = -\text{C}_6\text{H}_4\text{-}p\text{-Si}(\text{2-ethylhexyl})_3$ ) in  $\text{C}_6\text{D}_6$ .

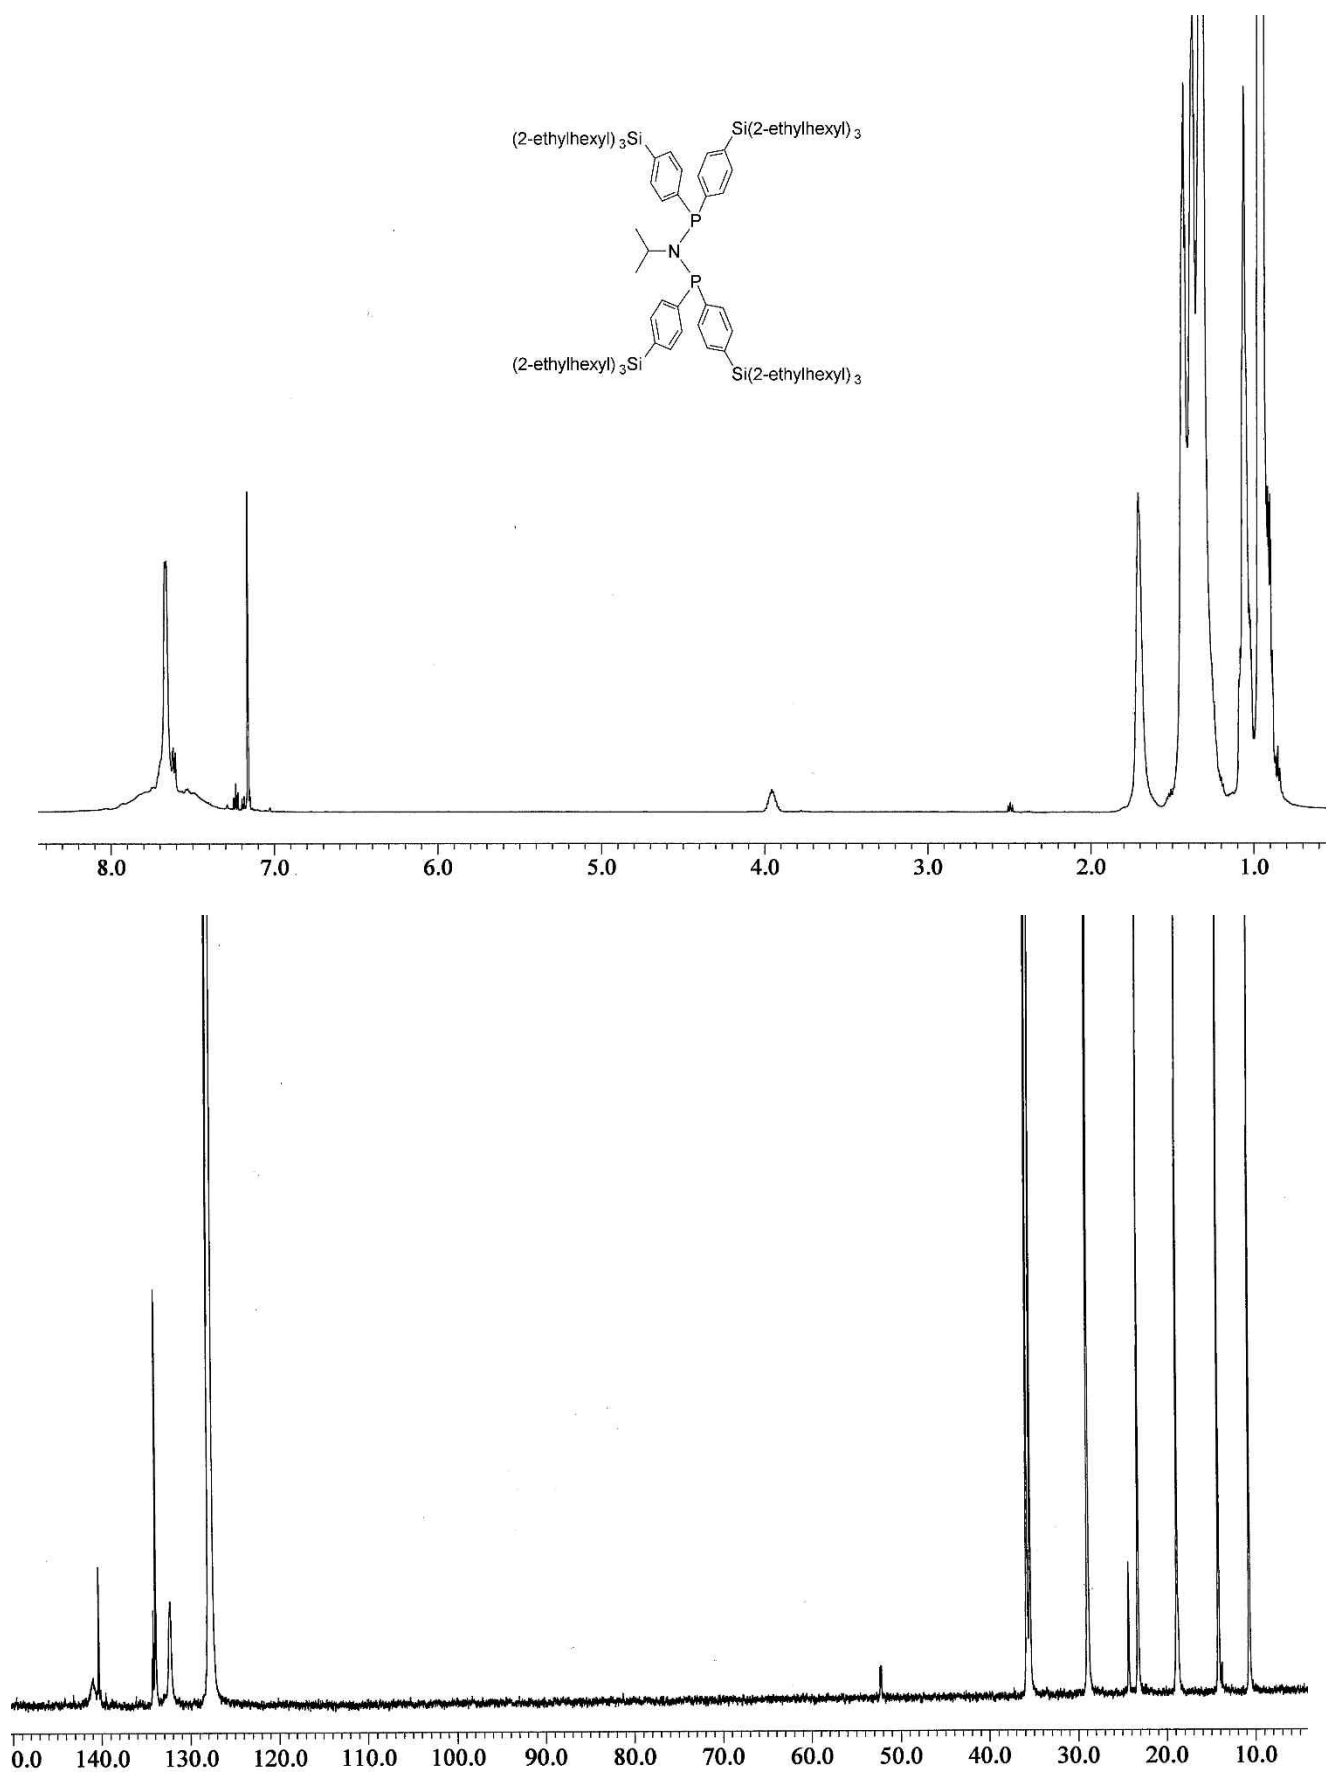

**Figure S24.**  $^1\text{H}$  and  $^{13}\text{C}$  NMR spectra of  $\text{iPrN}(\text{PAR}_2)_2$  ( $\text{Ar} = -\text{C}_6\text{H}_4\text{-}p\text{-Si(3,7-dimethyloctyl)}_3$ ) in  $\text{C}_6\text{D}_6$ .

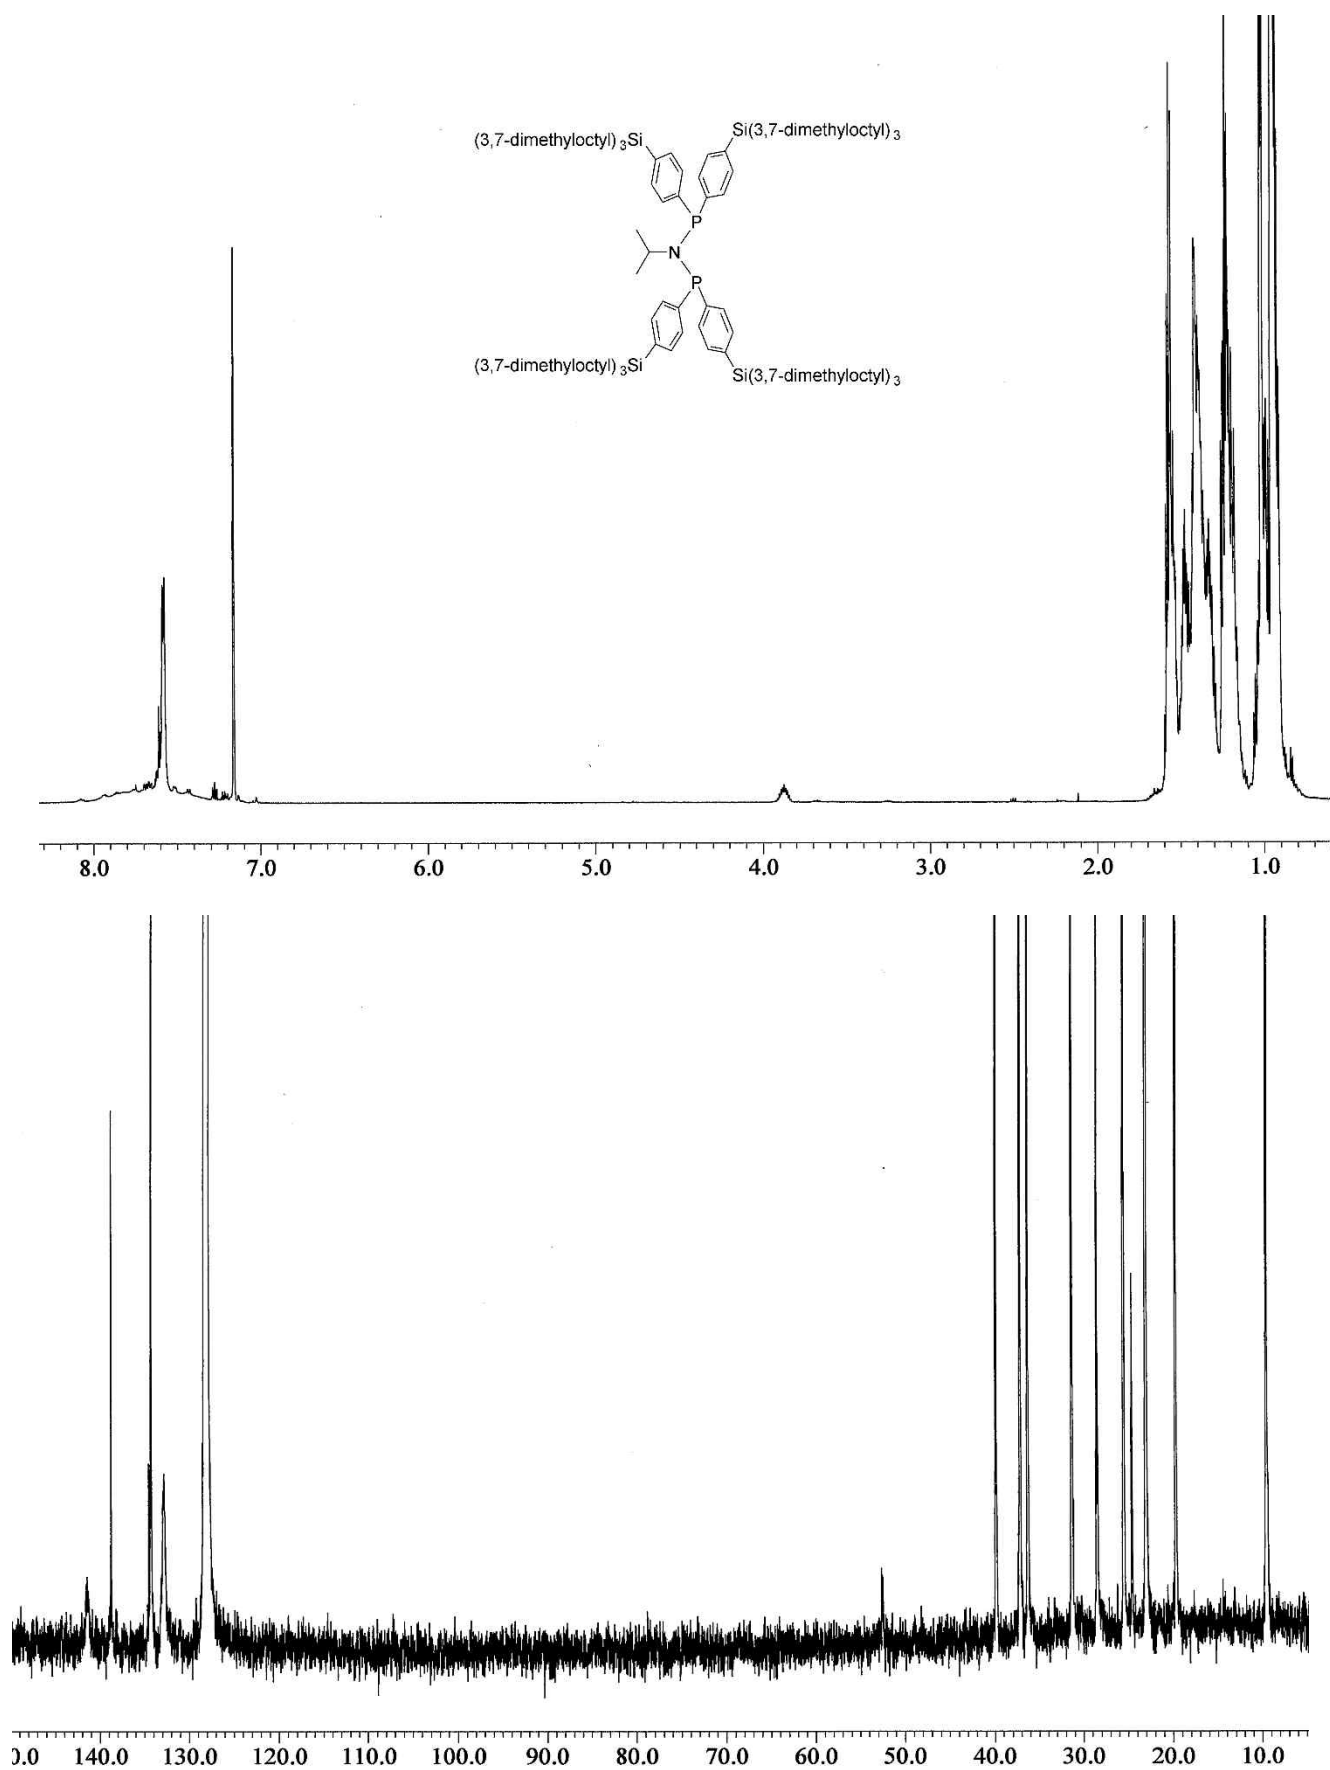

**Figure S25.**  $^1\text{H}$  and  $^{13}\text{C}$  NMR spectra  $\text{C}_6\text{H}_{11}\text{N}(\text{PAr}_2)_2$  ( $\text{Ar} = -\text{C}_6\text{H}_4\text{-}p\text{-Si(1-octyl)}_3$ ) in  $\text{C}_6\text{D}_6$ .

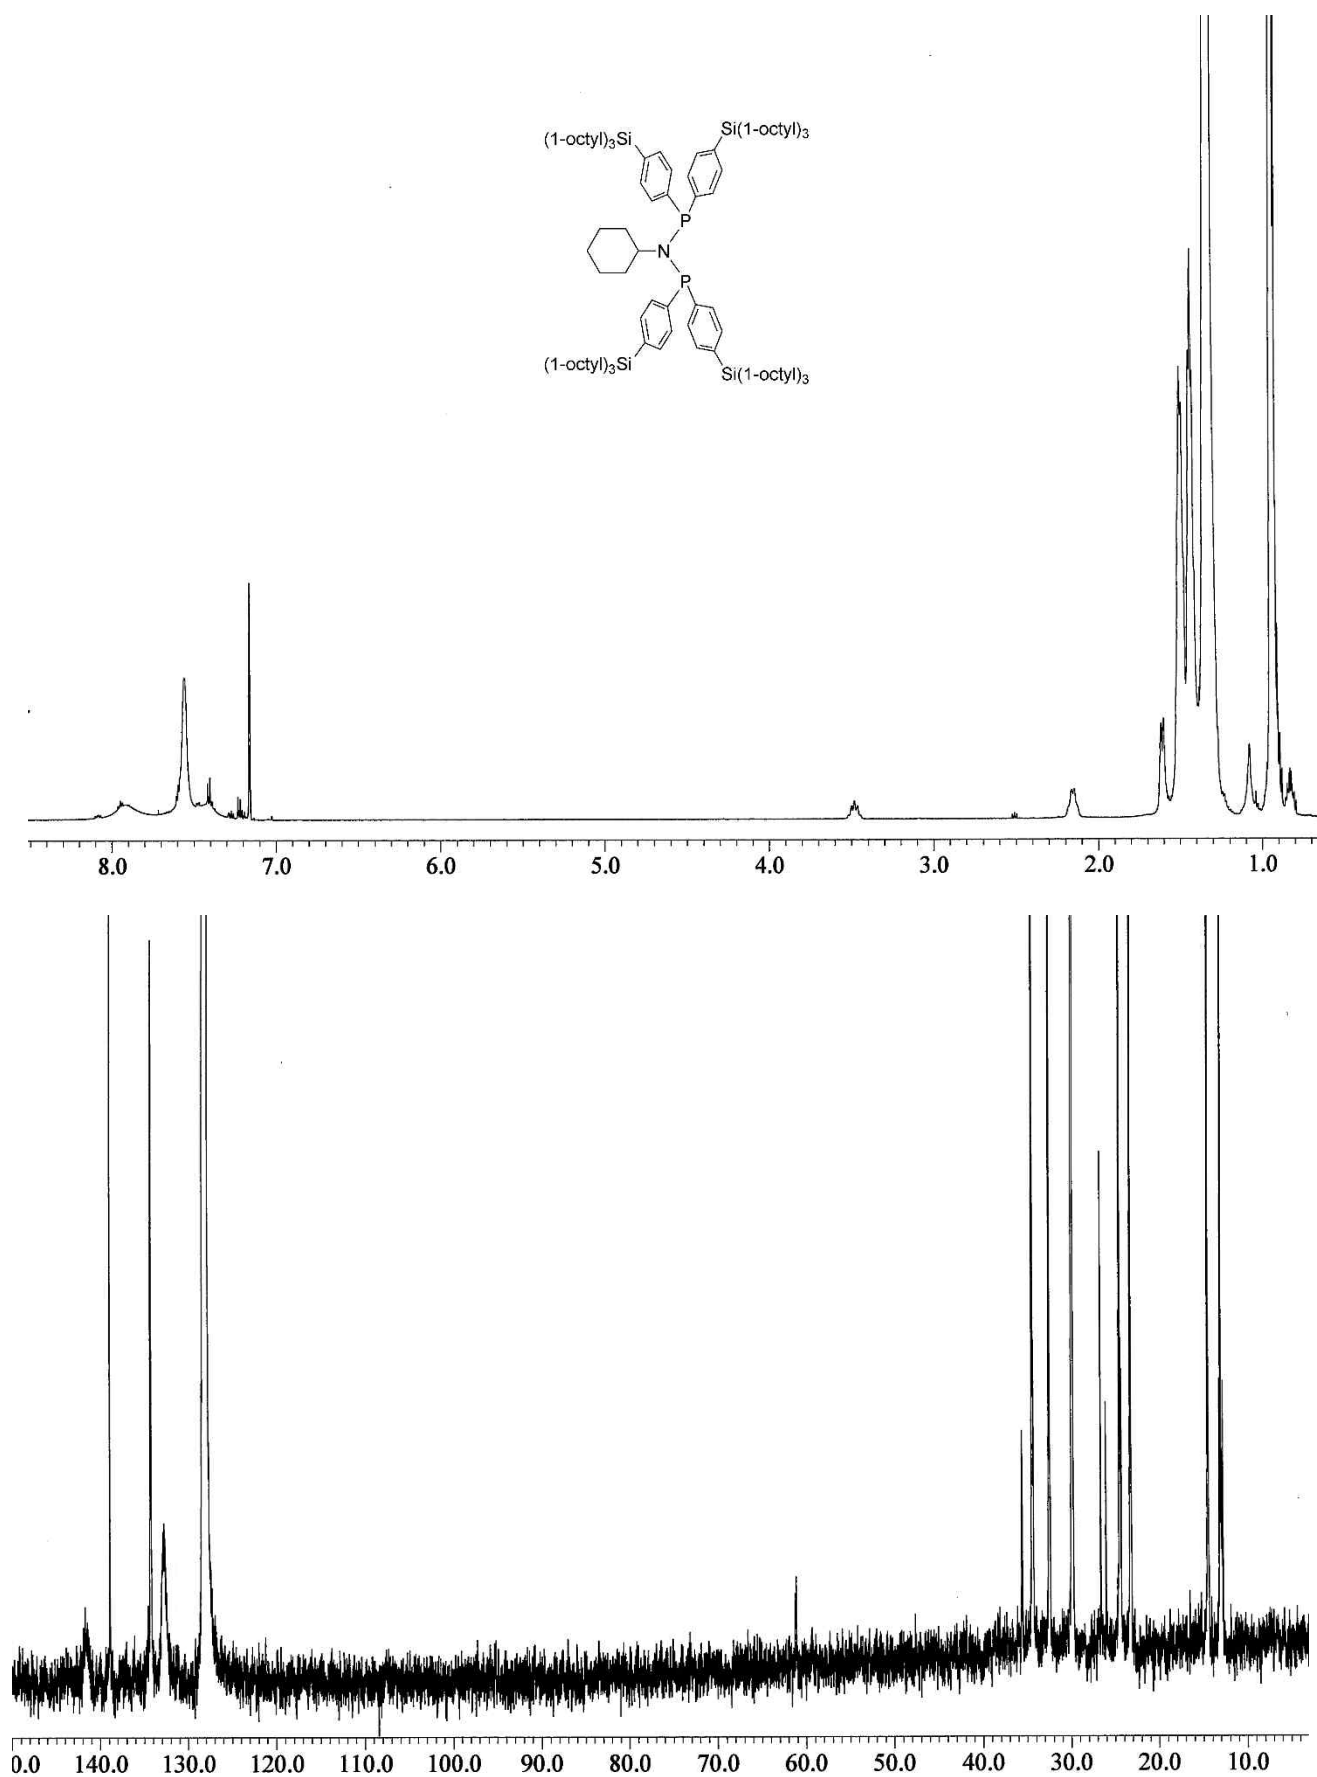

**Figure S26.**  $^1\text{H}$  and  $^{13}\text{C}$  NMR spectra of 2-Et-6-Me- $\text{C}_6\text{H}_3\text{N}(\text{PAr}_2)_2$  ( $\text{Ar} = -\text{C}_6\text{H}_4-p\text{-Si}(\text{nBu})_3$ ) in  $\text{C}_6\text{D}_6$ .

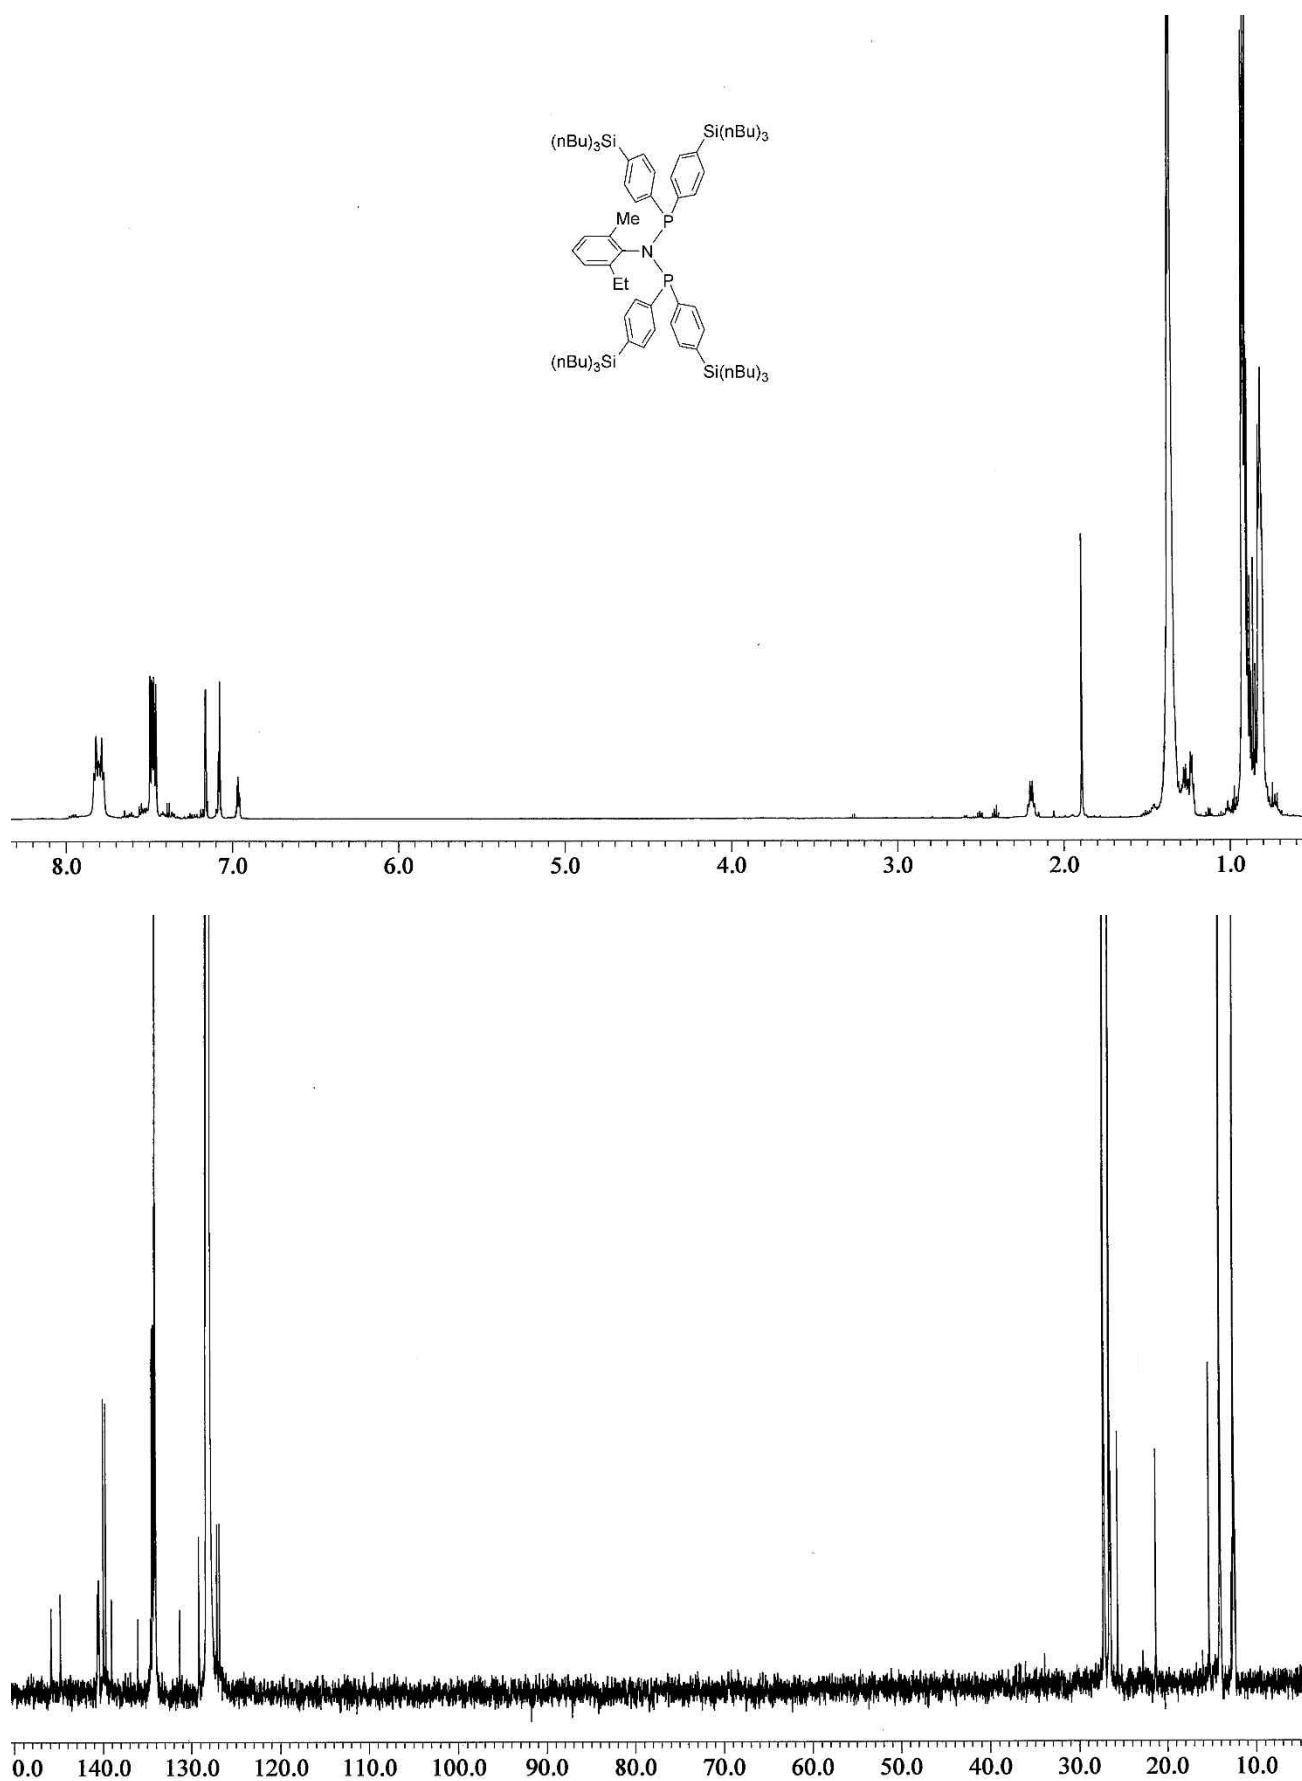

**Figure S27.**  $^1\text{H}$  and  $^{13}\text{C}$  NMR spectra of  $\text{iPrN(H)PAr}_2$  ( $\text{Ar} = -\text{C}_6\text{H}_4\text{-}p\text{-Si(1-decyl)}_3$ ) in  $\text{C}_6\text{D}_6$ .

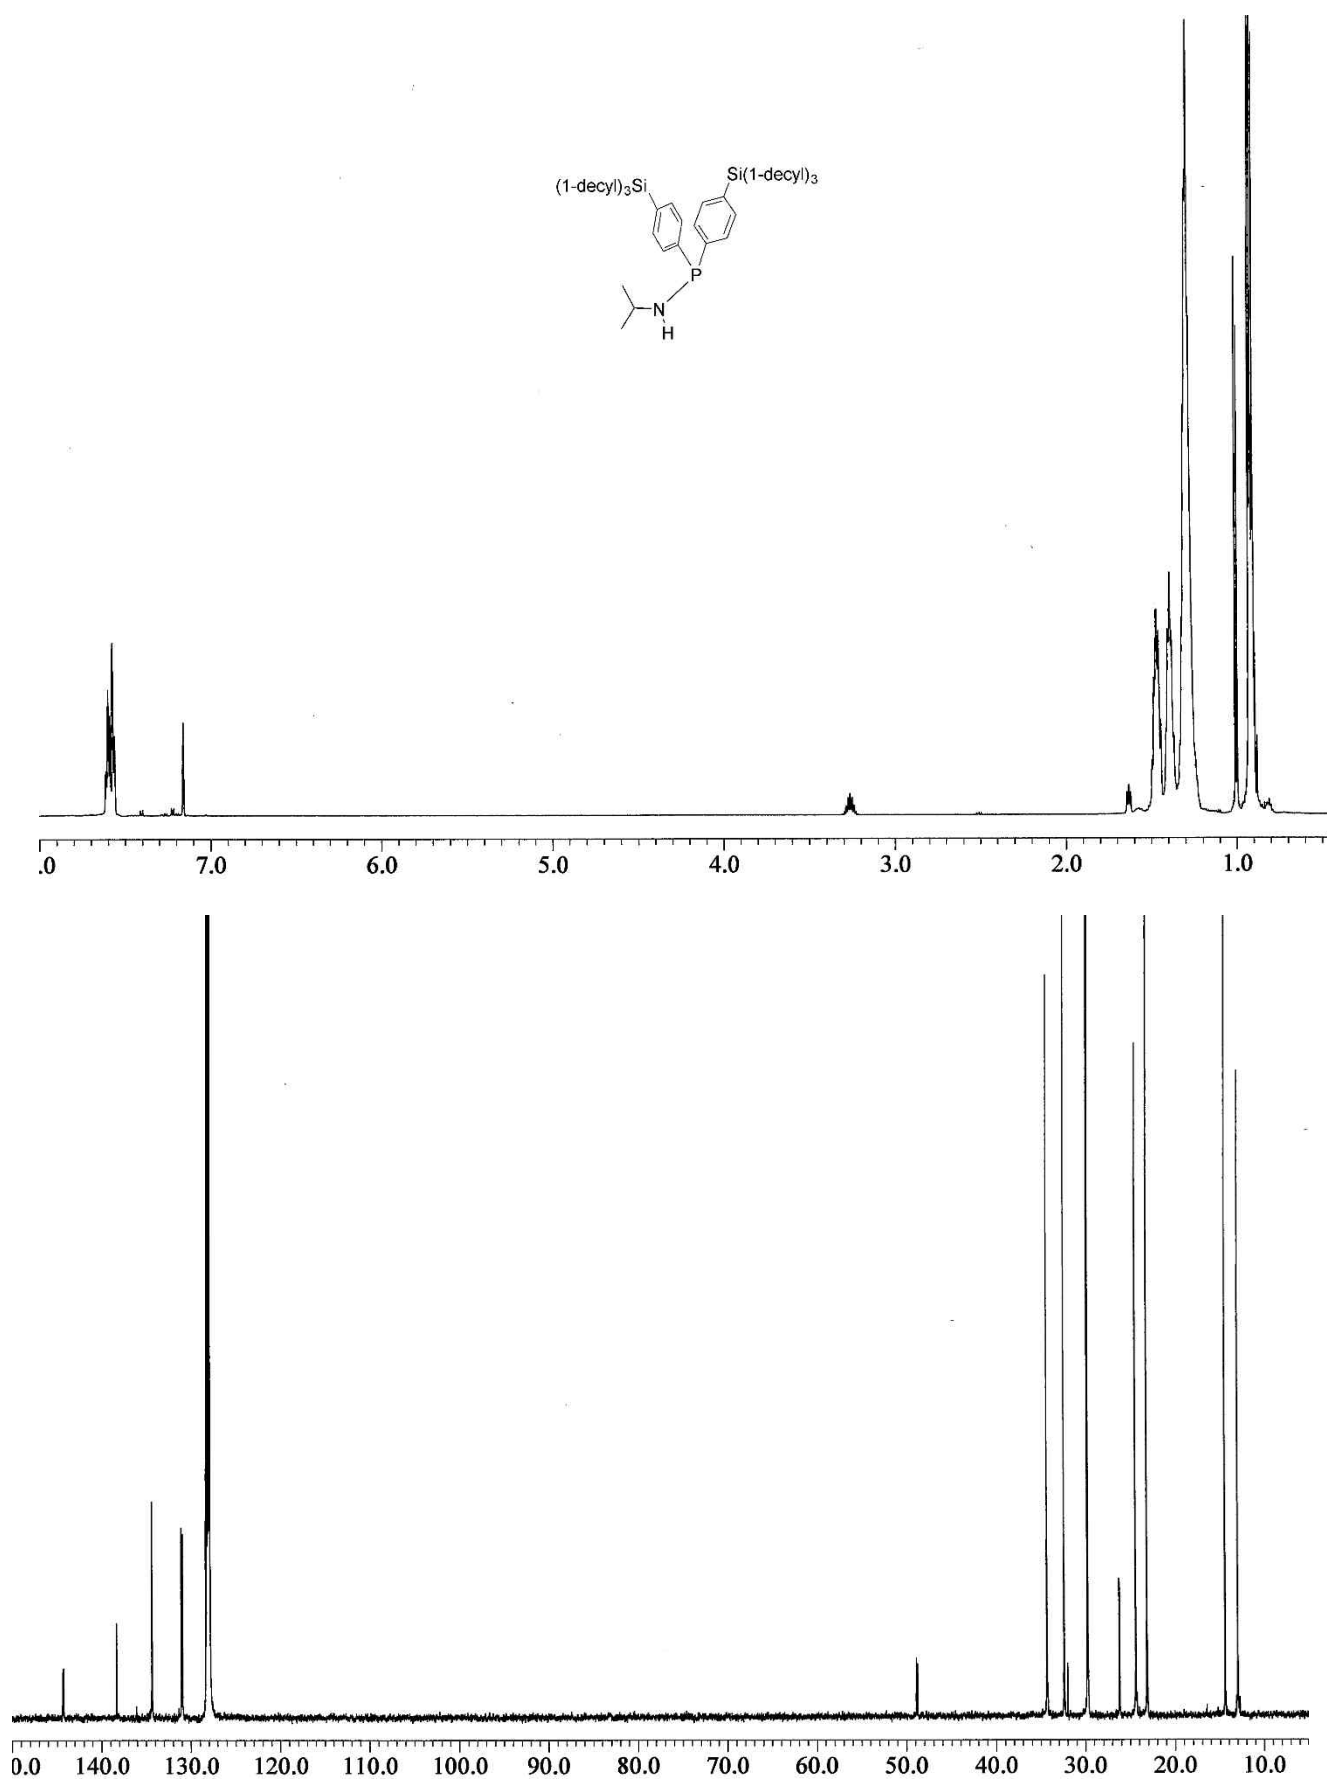

**Figure S28.**  $^1\text{H}$  and  $^{13}\text{C}$  NMR spectra of  $\text{iPrN}(\text{PPh}_2)(\text{PAR}_2)$  ( $\text{Ar} = -\text{C}_6\text{H}_4\text{-}p\text{-Si}(\text{1-decyl})_3$ ) in  $\text{C}_6\text{D}_6$ .

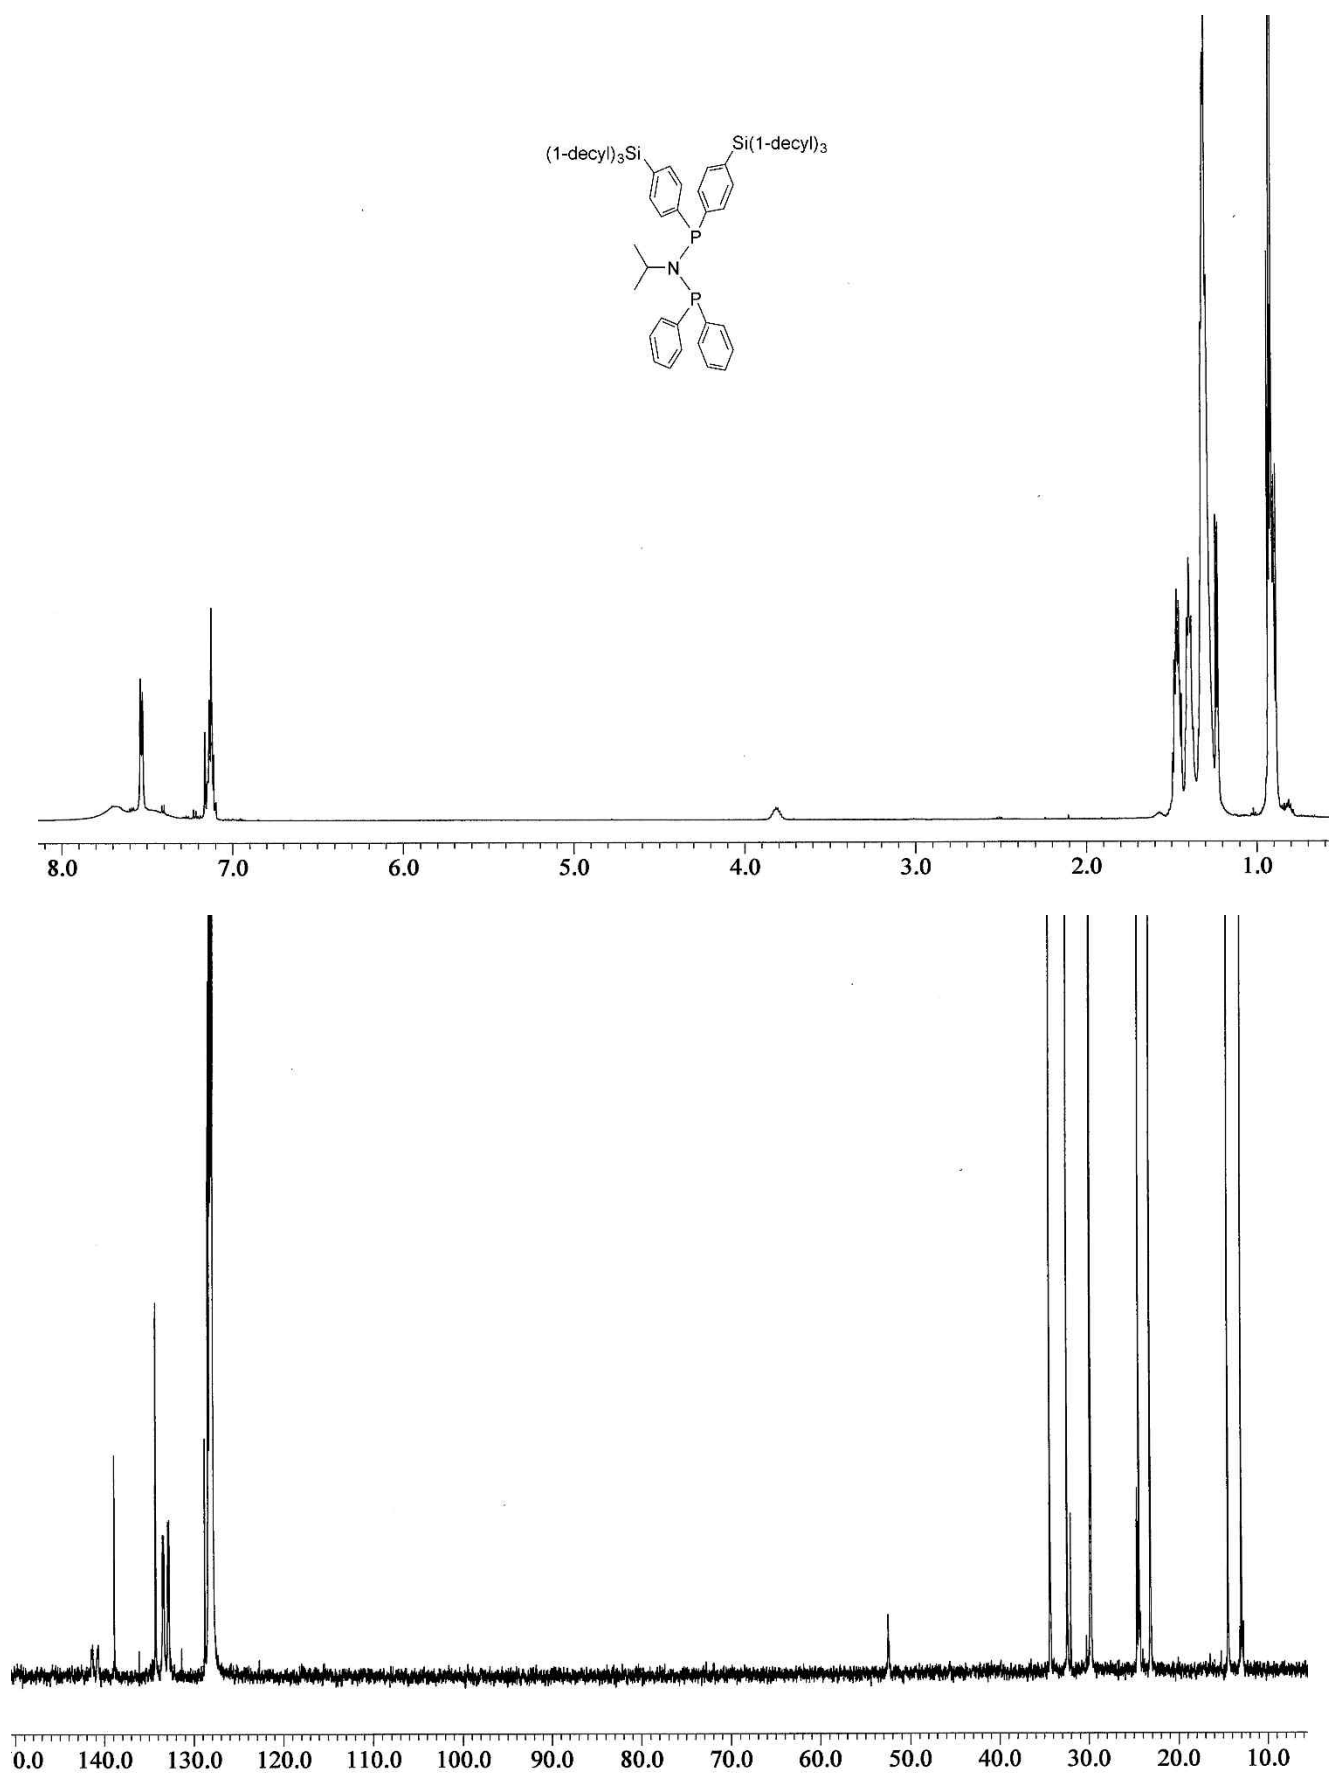

**Figure S29.**  $^1\text{H}$  and  $^{13}\text{C}$  NMR spectra of *ortho*- $\text{C}_6\text{H}_4\text{N}(\text{PPh}_2)(\text{PAr}_2)$  ( $\text{Ar} = -\text{C}_6\text{H}_4\text{-}p\text{-Si}(\text{1-octyl})_3$ ) in  $\text{C}_6\text{D}_6$ .

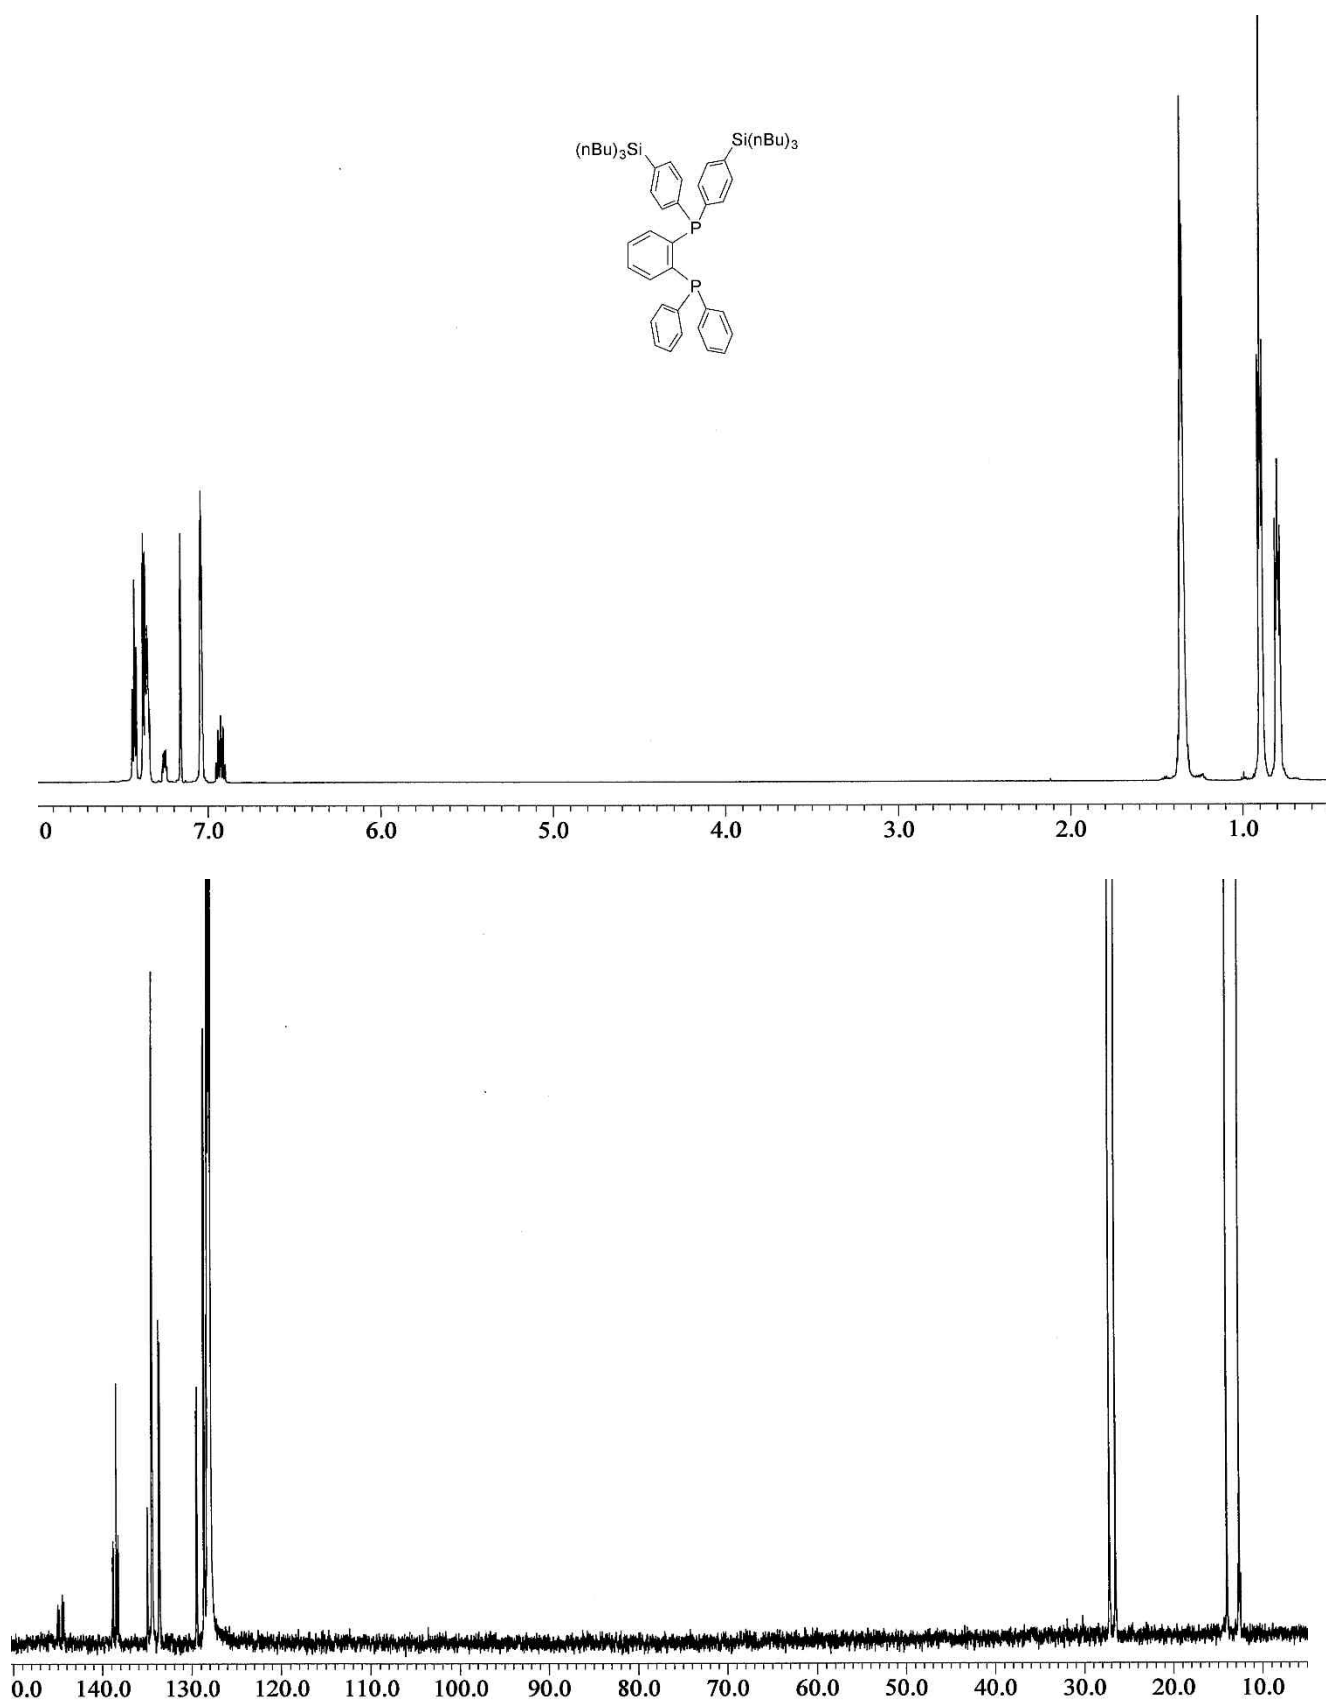

Supplement: s1 [file s1]
