# Supplementary material for: Preparation of Extremely Active Ethylene Tetramerization Catalyst [iPrN(PAr2)2−CrCl2]+[B(C6F5)4]– (Ar = −C6H4-p-SiR3)
Source: MDPI journal article supplement (doi:10.3390/catal11091122), 2021-09-18
Supplement: s1 [file s1]

Archive with 1 entries (1 files):
- catalysts-1369440-supplementary.pdf
